# Supplementary material for: Plant proximity perception dynamically modulates hormone levels and sensitivity in Arabidopsis
Source: PubMed Central journal article supplement (PMC4056540; doi:10.1093/jxb/eru083), 2014-03-08
Supplement: supp_eru083_jexbot108530_file001.pdf [file supp_eru083_jexbot108530_file001.pdf]

## SUPPLEMENTAL INFORMATION

### Plant proximity perception dynamically modulates hormone levels and sensitivity in *Arabidopsis*

Jordi Bou-Torrent, Anahit Galstyan, Marçal Gallemí, Nicolás Cifuentes-Esquivel, María José Molina-Contreras, Mercè Salla-Martret, Yusuke Jikumaru, Shinjiro Yamaguchi, Yuji Kamiya and Jaime F Martínez-García

#### SUPPLEMENTAL DATA

**Figure S1.** Analysis of hormone levels in wild-type seedlings treated with simulated shade. Seedlings were germinated and grown for 5 days under W and then either kept in W or transferred to W+FR for 4 h. Data represent the mean  $\pm$  SE of three experiments; FW, fresh weight. Different letters denote significant differences ( $P < 0.01$  for IAA levels;  $P < 0.05$  for CS levels; and  $P < 0.1$  for GA<sub>4</sub> levels) among means.

**Figure S2.** Merging of microarray data from shade-regulated and BL- and GA-regulated genes. **(A)** Venn diagrams illustrating the overlap between the class SD (left), class SU (right), class of BL up- (top) and down-regulated (bottom) genes. The comparison between the different groups of genes defines the class S+B, listed in Table S3. **(B)** Venn diagrams illustrating the overlap between the class SD (left), class SU (right), class of GA up- (top) and down-regulated (bottom) genes. The comparison between the different groups of genes defines the class S+G, listed in Table S3.

**Figure S3.** Cartoon depicting the different truncated HFR1 derivatives overexpressed in transgenic plants. Transgenes were expressed under the control of the 35S promoter (P<sub>35S</sub>) and fused to the GFP reporter protein. The name of the corresponding transgenic plants and their response to W+FR (Galstyan *et al.*, 2011) is summarized in the right.

**Figure S4.** Effect of PAR1 and PAR2 on BR-induced gene expression. **(A)** Seven-day-old W-grown seedlings were treated with 1  $\mu$ M EBL for the indicated times (in hours). **(B)** RNA blot analysis of *SAUR15*, *SAUR68* and *At5g45670* expression in wt and transgenic seedlings overexpressing PAR1-GG (line 13) and PAR2-G (line 03). Plant material for RNA extraction was harvested at the time points indicated. 25S rRNA levels are shown as a loading control of the corresponding (upper) membranes.

**Figure S5.** Venn diagrams illustrating the subgroup of shade-responding genes in wild-type, *sav1* and *sav3* mutant seedlings. Merging of microarray data from rapidly down- (left) and up-regulated (right) group of genes in wild-type (Col-0), *sav1* and *sav3* mutant seedlings in response to 1h of W+FR (Tao *et al.*, 2008). The total number of genes in each group, indicated in parenthesis, is listed in Table S2. The numbers of genes in each sector is indicated.

**Table S1.** ANOVA table for experiments shown in Figure 2.

**Table S2.** List of regulated genes identified in response to 1h of W+FR in, wild-type, *sav1* and *sav3* mutant seedlings.

**Table S3.** List of shade- regulated and IAA-, BL- and GA-regulated genes.

**Table S4.** ANOVA table for experiments shown in Figure 4.

**Table S5.** ANOVA table for experiments shown in Figure 5.

**Table S6.** ANOVA table for experiments shown in Figure 6.

**Table S7.** Changes in the expression of genes reported as involved in some aspects of BR **(A)** or GA **(B)** metabolism or inactivation in response to short (1 h) or long treatments (24 h) with simulated shade.

## **SUPPLEMENTAL EXPERIMENTAL PROCEDURES**

### **CS levels quantification**

At the head of extraction, approximately 500 pg/g fresh weight of  $[^2\text{H}]_4\text{-CS}$  was added as an internal standard. Neutral extracts containing BRs were prepared by sequential extraction with hydrophobic, cation-exchange and anion-exchange cartridges, as described (Yoshimoto *et al.*, 2009). Extracts were dried, suspended in 1 ml of  $\text{CHCl}_3$  and loaded onto normal phase extraction cartridge (Waters, SepPak Silica). BRs were eluted with 2 ml of  $\text{CHCl}_3\text{:MeOH}$  (9:1, v/v) after washing with 1 ml of  $\text{CHCl}_3$ . Extracts were dried and dissolved into 100  $\mu\text{l}$  of 50% MeOH and subjected to HPLC equipped with ODS column (SHISEIDO, CAPCELL PAK C18, 4.6x250 mm). Separation was performed using a gradient of increasing acetonitrile to water (flow rate of 1 ml/min). 10% acetonitrile was eluted over 10 min and increased to 40% over 11 min. Then concentration of acetonitrile was increased to 60% over 30 min. After washing with 90% acetonitrile over 40 min, the initial condition was restored and allowed to equilibrate over 50 min. Eluents were collected for 1 tube/min. After drying up the solvent, fractions 23<sup>rd</sup> to 30<sup>th</sup> were

analyzed with liquid chromatography-electrospray ionization-tandem mass spectrometry (LC-ESI-MS/MS) (Agilent, 1200-6410). LC conditions and parameters for LC-ESI-MS/MS analysis are shown in the Table below. Ratio was calculated comparing areas of endogenous to internal standard. Concentration of endogenous CS was calculated with the average of three specific productions.

---

**LC conditions of LC-ESI-MS/MS analysis**

| Solvent A                          | Solvent B                                 | Composition of solvent<br>B |
|------------------------------------|-------------------------------------------|-----------------------------|
| Water containing 0.01%<br>pyridine | Acetonitrile containing<br>0.01% pyridine | 3 to 63% over 18 min        |

---

**MS conditions of LC-ESI-MS/MS analysis**

|                                                                                           | Retention<br>time<br>(min) | Charge | MS/MS<br>transition<br>( <i>m/z</i> ) | Collision<br>energy<br>(V) | Fragmen<br>tor (V) |
|-------------------------------------------------------------------------------------------|----------------------------|--------|---------------------------------------|----------------------------|--------------------|
| <b>Castasterone<br/>(CS)</b>                                                              | 15.5                       | -      | 463/129<br>463/411<br>463/427         | 22                         | 190                |
| <b>[<sup>2</sup>H]<sub>4</sub>-<br/>Castasterone<br/>([<sup>2</sup>H]<sub>4</sub>-CS)</b> | 15.4                       | -      | 467/129<br>467/415<br>467/431         | 22                         | 190                |

**RNA blot analysis**

Total RNA was isolated from seedlings, electrophoresed (10 µg) and blotted as described elsewhere (Roig-Villanova *et al.*, 2006). Hybridization probes for *SAUR15*, *SAUR68* and *25S* rRNA were prepared as described (Sorin *et al.*, 2009). Probe for *At5g45670* was made by amplifying Col-0 genomic DNA with specific primers B042 (5'-TAG-AAA-AAG-ATG-GCG-AGA-ATG-AGT-3') and B043 (5'-GAT-

CTT-TCT-CTC-TTT-AGA-GAG-ATG-C-3'). The resulting PCR product was subcloned into pGEMT-easy (Promega, [www.promega.com](http://www.promega.com)) to give pJB31. Inserts were sequenced for identity confirmation.

Probes for DNA inserts, isolated by restriction digestion or by PCR using specific primers, were radioactively labeled with [ $\alpha^{32}\text{P}$ ]dCTP by using a random primed DNA-labeling kit ([www.roche-applied-science.com](http://www.roche-applied-science.com)) or by PCR using one specific primer to label only the antisense strand. Labeled DNA was purified through Sephadex G-50 columns (GE Healthcare, [www1.gelifesciences.com](http://www1.gelifesciences.com)). Hybridization, washes, exposure and quantification of radioactive signals were carried out as described (Roig-Villanova *et al.*, 2006). Images were visualized by using a molecular imager FX (Bio-Rad, [www.bio-rad.com](http://www.bio-rad.com)). Expression levels were normalized with the 25S rRNA signal.

#### **SUPPLEMENTAL REFERENCES**

**Galstyan A, Cifuentes-Esquivel N, Bou-Torrent J, Martinez-Garcia JF.** 2011. The shade avoidance syndrome in Arabidopsis: a fundamental role for atypical basic helix-loop-helix proteins as transcriptional cofactors. *The Plant Journal* **66**, 258-267.

**Roig-Villanova I, Bou J, Sorin C, Devlin PF, Martinez-Garcia JF.** 2006. Identification of primary target genes of phytochrome signaling. Early transcriptional control during shade avoidance responses in Arabidopsis. *Plant Physiology* **141**, 85-96.

**Sorin C, Salla-Martret M, Bou-Torrent J, Roig-Villanova I, Martinez-Garcia JF.** 2009. ATHB4, a regulator of shade avoidance, modulates hormone response in Arabidopsis seedlings. *The Plant Journal* **59**, 266-277.

**Tao Y, Ferrer JL, Ljung K, et al.** 2008. Rapid synthesis of auxin via a new tryptophan-dependent pathway is required for shade avoidance in plants. *Cell* **133**, 164-176.

**Yoshimoto K, Jikumaru Y, Kamiya Y, Kusano M, Consonni C, Panstruga R, Ohsumi Y, Shirasu K.** 2009. Autophagy negatively regulates cell death by controlling NPR1-dependent salicylic acid signaling during senescence and the innate immune response in Arabidopsis. *The Plant Cell* **21**, 2914-2927.

**Figure S1**

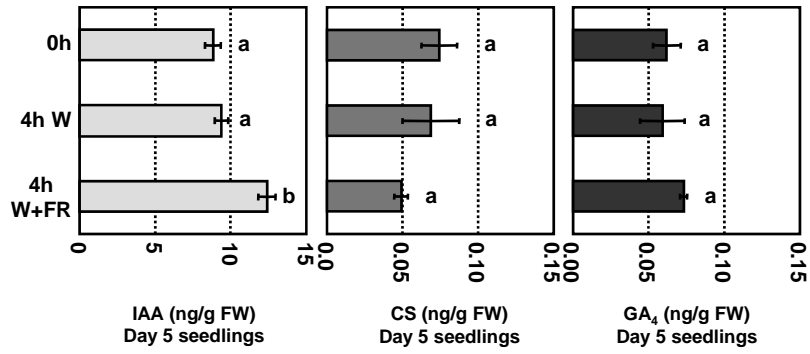

**Figure S1.** Analysis of hormone levels in wild-type seedlings treated with simulated shade. Seedlings were germinated and grown for 5 days under W and then either kept in W or transferred to W+FR for 4 h. Data represent the mean  $\pm$  SE of three experiments; FW, fresh weight. Different letters denote significant differences ( $P < 0.01$  for IAA levels;  $P < 0.05$  for CS levels; and  $P < 0.1$  for GA<sub>4</sub> levels) among means.

**Figure S2**

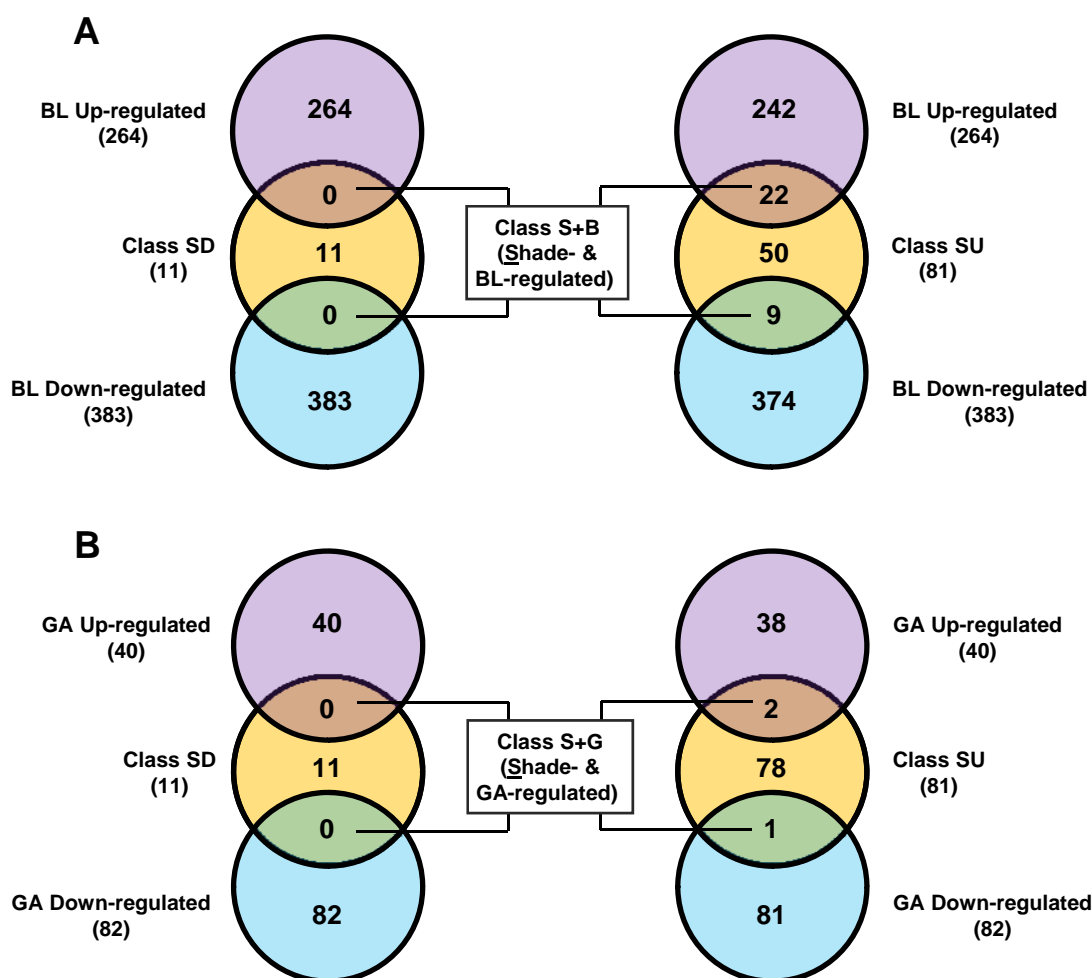

**Figure S2.** Merging of microarray data from shade-regulated and BL- and GA-regulated genes. **(A)** Venn diagrams illustrating the overlap between the class SD (left), class SU (right), class of BL up- (top) and down-regulated (bottom) genes. The comparison between the different groups of genes defines the class S+B, listed in Table S3. **(B)** Venn diagrams illustrating the overlap between the class SD (left), class SU (right), class of GA up- (top) and down-regulated (bottom) genes. The comparison between the different groups of genes defines the class S+G, listed in Table S3.

**Figure S3**

|                  |     |   |       | Response to W+FR |                |                        |                  |      |
|------------------|-----|---|-------|------------------|----------------|------------------------|------------------|------|
|                  |     |   |       | name             | HYP elongation | <i>PIL1</i> expression |                  |      |
| P <sub>35S</sub> | GFP | B | HLH+C | G-BH             | Very reduced   | Very reduced           |                  |      |
| P <sub>35S</sub> | GFP |   | HLH+C | G-H              | Abolished      | Abolished              |                  |      |
| P <sub>35S</sub> |     | N | B     | HLH+C            | H              | HFR1-HA                | Slightly reduced | N.D. |

**Figure S3.** Cartoon depicting the different truncated HFR1 derivatives overexpressed in transgenic plants. Transgenes were expressed under the control of the 35S promoter (P35S) and fused to the GFP reporter protein. The name of the corresponding transgenic plants and their response to W+FR (Galstyan et al., 2011) is summarized in the right.



## Figure S4

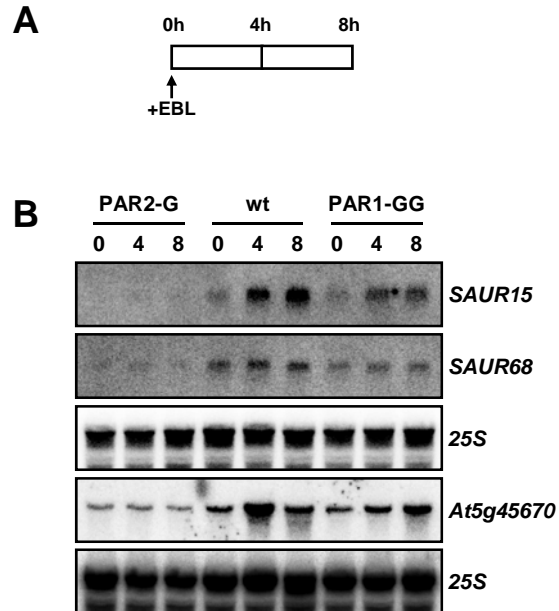

**Figure S4.** Effect of PAR1 and PAR2 on BR-induced gene expression. **(A)** Seven-day-old W-grown seedlings were treated with 1  $\mu$ M EBL for the indicated times (in hours). **(B)** RNA blot analysis of *SAUR15*, *SAUR68* and *At5g45670* expression in wt and transgenic seedlings overexpressing PAR1-GG (line 13) and PAR2-G (line 03). Plant material for RNA extraction was harvested at the time points indicated. 25S rRNA levels are shown as a loading control of the corresponding (upper) membranes.

**Figure S5**

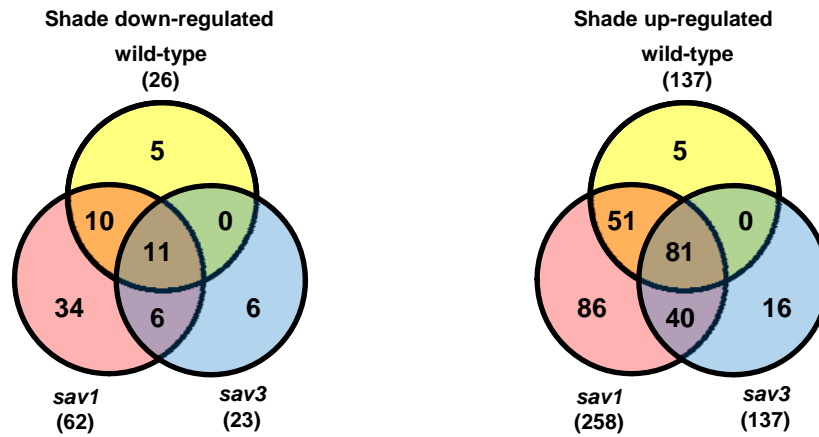

**Figure S5.** Venn diagrams illustrating the subgroup of shade-responding genes in wild-type, *sav1* and *sav3* mutant seedlings. Merging of microarray data from rapidly down- (left) and up-regulated (right) group of genes in wild-type (Col-0), *sav1* and *sav3* mutant seedlings in response to 1h of W+FR (Tao et al., 2008). The total number of genes in each group, indicated in parenthesis, is listed in Table S2. The numbers of genes in each sector is indicated.

**Table S1.** ANOVA table for experiments shown in Figures 2B and 2D. DF, Degrees of Freedom; SS, Sum of Squares; MS; Mean Square.

HYP elongation in W vs. W+FR (Figure 2B)

| Source of variation | DF  | SS    | MS     | F-value | p-value |
|---------------------|-----|-------|--------|---------|---------|
| Simulated shade     | 1   | 225.8 | 225.8  | 1162.91 | <0.0001 |
| PIC                 | 2   | 27.21 | 13.60  | 70.06   | <0.0001 |
| Interaction         | 2   | 64.28 | 32.14  | 165.52  | <0.0001 |
| Residual (error)    | 174 | 33.79 | 0.1942 | -       | -       |

HYP elongation in W vs. W+FR (Figure 2B)

| Source of variation | DF  | SS    | MS     | F-value | p-value |
|---------------------|-----|-------|--------|---------|---------|
| Simulated shade     | 1   | 182.2 | 182.2  | 604.86  | <0.0001 |
| EBL                 | 2   | 69.0  | 34.5   | 114.52  | <0.0001 |
| Interaction         | 2   | 70.74 | 35.37  | 117.39  | <0.0001 |
| Residual (error)    | 139 | 41.88 | 0.3013 | -       | -       |

HYP elongation in W vs. W+FR (Figure 2B)

| Source of variation | DF  | SS    | MS     | F-value | p-value |
|---------------------|-----|-------|--------|---------|---------|
| Simulated shade     | 1   | 652.6 | 652.6  | 2106.90 | <0.0001 |
| GA3                 | 2   | 63.35 | 31.67  | 102.25  | <0.0001 |
| Interaction         | 2   | 2.671 | 1.336  | 4.31    | 0.0155  |
| Residual (error)    | 120 | 37.17 | 0.3098 | -       | -       |

HYP elongation in W vs. W+FR (Figure 2D)

| Source of variation | DF  | SS    | MS     | F-value | p-value |
|---------------------|-----|-------|--------|---------|---------|
| Simulated shade     | 1   | 11.79 | 11.79  | 45.99   | <0.0001 |
| EBL                 | 4   | 370.2 | 92.54  | 361.05  | <0.0001 |
| Interaction         | 4   | 14.66 | 3.665  | 14.30   | <0.0001 |
| Residual (error)    | 263 | 67.41 | 0.2563 | -       | -       |

HYP elongation in W vs. W+FR (Figure 2D)

| Source of variation | DF  | SS    | MS      | F-value | p-value |
|---------------------|-----|-------|---------|---------|---------|
| Simulated shade     | 1   | 42.48 | 42.48   | 1003.52 | <0.0001 |
| GA3                 | 2   | 59.31 | 29.65   | 700.46  | <0.0001 |
| Interaction         | 2   | 19.06 | 9.530   | 225.10  | <0.0001 |
| Residual (error)    | 111 | 4.699 | 0.04234 | -       | -       |

**Table S2.** List of regulated genes identified in response to 1h of W+FR in, wild-type, *sav1* and *sav3* mutant seedlings.

| <b>Shade-regulated in Col-0 seedlings</b>                                                                                                                                                                                                                                                                                   |             |                  |                                                                                                                                                                             |             |             |         |             |          |
|-----------------------------------------------------------------------------------------------------------------------------------------------------------------------------------------------------------------------------------------------------------------------------------------------------------------------------|-------------|------------------|-----------------------------------------------------------------------------------------------------------------------------------------------------------------------------|-------------|-------------|---------|-------------|----------|
| <b>Down-regulated genes identified in response to 1h of W+FR in wild-type (Col-0) seedlings. "Down-regulated" indicates genes that have significantly (BH&lt;0.05) lower signal (Fold change &lt; 1.5) after 1h of W+FR compared to their levels at time 0 (immediately before starting the simulated shade treatment).</b> |             |                  |                                                                                                                                                                             |             |             |         |             |          |
| Sequence ID                                                                                                                                                                                                                                                                                                                 | Accession # | Sequence Name(s) | Sequence Description                                                                                                                                                        | Log (Error) | Log (Ratio) | Ratio   | Fold Change | BH       |
| 950147                                                                                                                                                                                                                                                                                                                      | At4g02410   | 255502_at        | contains similarity to a protein kinase domain (Pfam: pkinase.hmm, score: 166.20) and to legume lectins beta domain (Pfam: lectin_legB.hmm, score: 139.32)                  | 0.03521     | -0.17845    | 0.66306 | -1.50817    | 6.41E-05 |
| 952964                                                                                                                                                                                                                                                                                                                      | At3g02910   | 258609_at        | unknown protein ;supported by full-length cDNA: Ceres:269248.                                                                                                               | 0.04363     | -0.18302    | 0.65612 | -1.52412    | 0.003153 |
| 954060                                                                                                                                                                                                                                                                                                                      | At1g77760   | NIA1             | nitrate reductase 1 (NR1) identical to nitrate reductase 1 (NR1) GB:P11832 [Arabidopsis thaliana]; supported by cDNA: gi_15983498_gb_AF424624.1_AF424624                    | 0.02868     | -0.18347    | 0.65544 | -1.52569    | 4.19E-08 |
| 956953                                                                                                                                                                                                                                                                                                                      | At1g15260   | 262598_at        | unknown protein EST gb N65467 comes from this gene;supported by full-length cDNA: Ceres:30239.                                                                              | 0.02234     | -0.18414    | 0.65442 | -1.52806    | 8.76E-14 |
| 945089                                                                                                                                                                                                                                                                                                                      | At5g10030   | 250463_at        | transcription factor OBF4                                                                                                                                                   | 0.03715     | -0.18464    | 0.65367 | -1.52983    | 1.03E-04 |
| 958564                                                                                                                                                                                                                                                                                                                      | At1g54820   | 264240_at        | protein kinase, putative Simisimilar to protein kinase 2 GI:7573598 from [Populus nigra]                                                                                    | 0.04203     | -0.18738    | 0.64957 | -1.53949    | 1.05E-03 |
| 957334                                                                                                                                                                                                                                                                                                                      | At1g75710   | 262969_at        | unknown protein                                                                                                                                                             | 0.04266     | -0.18778    | 0.64896 | -1.54093    | 0.001164 |
| 955903                                                                                                                                                                                                                                                                                                                      | At1g01140   | 261581_at        | serine/threonine kinase, putative similar to serine/threonine kinase GB:CAA73067.1 GI:2632252 from [Sorghum bicolor]; supported by cDNA: gi_14423523_gb_AF386999.1_AF386999 | 0.0447      | -0.19689    | 0.63549 | -1.57359    | 0.001164 |
| 961409                                                                                                                                                                                                                                                                                                                      | At2g37710   | 267165_at        | putative receptor-like protein kinase same as GB:X95909 (polymorphism exists at a GA repeat. We found 6 copies in our sequence whereas only 5 copies exist in GB:X95909)    | 0.03641     | -0.2027     | 0.62705 | -1.59478    | 5.07E-06 |
| 947271                                                                                                                                                                                                                                                                                                                      | At3g45210   | 252619_at        | putative protein several hypothetical proteins - Arabidopsis thaliana; supported by cDNA: gi_15724293_gb_AF412087.1_AF412087                                                | 0.03336     | -0.21022    | 0.61629 | -1.62263    | 7.37E-08 |
| 945930                                                                                                                                                                                                                                                                                                                      | At3g61890   | ATHB-12          | homeobox-leucine zipper protein ATHB-12 ;supported by full-length cDNA: Ceres:32615.                                                                                        | 0.05186     | -0.21882    | 0.60419 | -1.6551     | 0.002152 |
| 948984                                                                                                                                                                                                                                                                                                                      | At4g21990   | APR3             | PRH26 protein ;supported by full-length cDNA: Ceres:36866.                                                                                                                  | 0.05452     | -0.22652    | 0.59358 | -1.68468    | 0.003153 |
| 948764                                                                                                                                                                                                                                                                                                                      | At4g24780   | 254119_at        | putative pectate lyase pectate lyase, Musa acuminata, PATX:E209876;supported by full-length cDNA: Ceres:36681.                                                              | 0.0408      | -0.22874    | 0.59056 | -1.69331    | 4.29E-06 |
| 949219                                                                                                                                                                                                                                                                                                                      | At4g19380   | 254572_at        | putative protein predicted protein MTCY20G9, Mycobacterium tuberculosis                                                                                                     | 0.04846     | -0.23808    | 0.57798 | -1.73015    | 1.36E-04 |

| 941671                                                                                                                                                                                                                                                                                                                   | At5g67280   | 246986_at        | receptor-like protein kinase ;supported by full-length cDNA: Ceres:110712.                                                                                                               | 0.03437     | -0.24579    | 0.56782  | -1.76114    | 3.04E-10 |
|--------------------------------------------------------------------------------------------------------------------------------------------------------------------------------------------------------------------------------------------------------------------------------------------------------------------------|-------------|------------------|------------------------------------------------------------------------------------------------------------------------------------------------------------------------------------------|-------------|-------------|----------|-------------|----------|
| 960280                                                                                                                                                                                                                                                                                                                   | At2g15050   | 265894_at        | putative lipid transfer protein                                                                                                                                                          | 0.02684     | -0.24688    | 0.56639  | -1.76556    | 2.97E-17 |
| 947259                                                                                                                                                                                                                                                                                                                   | At3g44990   | XTR8             | xyloglucan endo-transglycosylase ; supported by cDNA: gi_15810248_gb_AY056163.1_                                                                                                         | 0.03971     | -0.25758    | 0.55262  | -1.80957    | 2.46E-08 |
| 956567                                                                                                                                                                                                                                                                                                                   | At1g74940   | 262170_at        | hypothetical protein predicted by genemark.hmm;supported by full-length cDNA: Ceres:24864.                                                                                               | 0.04359     | -0.26698    | 0.54078  | -1.84917    | 2.21E-07 |
| 950790                                                                                                                                                                                                                                                                                                                   | At1g51805   | 256168_at        | receptor protein kinase, putative contains Pfam profiles: PF00069: Eukaryotic protein kinase domain, multiple PF00560: Leucine Rich Repeat                                               | 0.03422     | -0.27325    | 0.53302  | -1.87609    | 6.61E-13 |
| 947096                                                                                                                                                                                                                                                                                                                   | At3g47420   | 252414_at        | putative protein sn-glycerol-3-phosphate permease - Haemophilus influenzae,PID:g3603157; supported by cDNA: gi_13430515_gb_AF360170.1_AF360170                                           | 0.0593      | -0.27475    | 0.53119  | -1.88257    | 4.98E-04 |
| 953273                                                                                                                                                                                                                                                                                                                   | At3g10525   | 258919_at        | Expressed protein ; supported by full-length cDNA: Ceres: 2153.                                                                                                                          | 0.06237     | -0.27743    | 0.52792  | -1.89422    | 1.08E-03 |
| 954461                                                                                                                                                                                                                                                                                                                   | At1g78170   | 260081_at        | unknown protein                                                                                                                                                                          | 0.03821     | -0.29174    | 0.51081  | -1.95768    | 9.12E-12 |
| 959272                                                                                                                                                                                                                                                                                                                   | At2g17300   | 264909_at        | unknown protein                                                                                                                                                                          | 0.06929     | -0.30676    | 0.49345  | -2.02654    | 1.16E-03 |
| 943916                                                                                                                                                                                                                                                                                                                   | At5g41410   | 249309_at        | homeotic protein BEL1 homolog ; supported by cDNA: gi_15146192_gb_AY049237.1_                                                                                                            | 0.07164     | -0.3096     | 0.49023  | -2.03987    | 0.002152 |
| 954728                                                                                                                                                                                                                                                                                                                   | At1g70560   | TAA1             | putative alliinase similar to alliinase precursor GB:AAD26853 [Allium cepa]                                                                                                              | 0.05473     | -0.34887    | 0.44785  | -2.23291    | 4.77E-08 |
| 947308                                                                                                                                                                                                                                                                                                                   | At3g44450   | 252661_at        | putative protein                                                                                                                                                                         | 0.08904     | -0.44725    | 0.35707  | -2.8006     | 7.90E-05 |
| <b>Up-regulated genes identified in response to 1h of W+FR in wild-type (Col-0) seedlings. "Up-regulated" indicates genes that have significantly (BH&lt;0.05) higher signal (Fold change &gt; 1.5) after 1h of W+FR compared to their levels at time 0 (immediately before starting the simulated shade treatment).</b> |             |                  |                                                                                                                                                                                          |             |             |          |             |          |
| Sequence ID                                                                                                                                                                                                                                                                                                              | Accession # | Sequence Name(s) | Sequence Description                                                                                                                                                                     | Log (Error) | Log (Ratio) | Ratio    | Fold Change | BH       |
| 947650                                                                                                                                                                                                                                                                                                                   | At4g37770   | 253066_at        | 1-aminocyclopropane-1-carboxylate synthase - like protein 1-aminocyclopropane-1-carboxylate synthase,Arabidopsis thaliana, S71174; supported by cDNA: gi_12247996_gb_AF334712.1_AF334712 | 0.20231     | 1.3997      | 25.10124 | 25.10124    | 1.51E-09 |
| 958701                                                                                                                                                                                                                                                                                                                   | At1g04180   | YUC9             | YUCCA9 - putative dimethylaniline monooxygenase                                                                                                                                          | 0.14058     | 1.15111     | 14.16142 | 14.16142    | 1.34E-13 |
| 956171                                                                                                                                                                                                                                                                                                                   | At1g15580   | IAA5             | auxin-induced protein IAA5, putative similar to auxin-induced protein IAA5 Gi:972913 from [Arabidopsis thaliana]                                                                         | 0.06258     | 1.12505     | 13.3367  | 13.3367     | 0        |
| 963796                                                                                                                                                                                                                                                                                                                   | At4g16780   | ATHB2            | DNA-binding homeotic protein Athb-2 ; supported by cDNA: gi_166751_gb_M90394.1_ATHHOMEOA                                                                                                 | 0.07788     | 1.09344     | 12.4005  | 12.4005     | 1.74E-41 |
| 958331                                                                                                                                                                                                                                                                                                                   | At2g42870   | PAR1             | unknown protein ;supported by full-length cDNA: Ceres:102453.                                                                                                                            | 0.15188     | 1.06334     | 11.57015 | 11.57015    | 8.52E-10 |

|        |           |             |                                                                                                                                                                                             |         |         |         |         |          |
|--------|-----------|-------------|---------------------------------------------------------------------------------------------------------------------------------------------------------------------------------------------|---------|---------|---------|---------|----------|
| 948061 | At4g32280 | 253423_at   | Expressed protein ; supported by cDNA:<br>gi_14190492_gb_AF380646.1_AF380646                                                                                                                | 0.14771 | 0.942   | 8.74978 | 8.74978 | 4.72E-08 |
| 945281 | At5g07010 | 250662_at   | steroid sulfotransferase-like protein ;supported by full-length cDNA:<br>Ceres:124067.                                                                                                      | 0.13376 | 0.90095 | 7.96076 | 7.96076 | 5.02E-09 |
| 945801 | At3g63440 | 251178_at   | cytokinin oxidase -like protein cytokinin oxidase, Zea mays,<br>EMBL:ZMY18377                                                                                                               | 0.09819 | 0.89729 | 7.89395 | 7.89395 | 5.00E-17 |
| 953710 | At3g03830 | 259332_at   | putative auxin-induced protein similar to SAUR GB:BAA25434<br>[Raphanus sativus]                                                                                                            | 0.06429 | 0.87031 | 7.41833 | 7.41833 | 1.77E-38 |
| 952778 | At3g15540 | IAA19       | early auxin-induced protein, IAA19 identical to IAA19 GB:AAB84356<br>from [Arabidopsis thaliana]; supported by full-length cDNA: Ceres:<br>94231.                                           | 0.04467 | 0.85056 | 7.08858 | 7.08858 | 0        |
| 954520 | At1g52830 | IAA6        | putative IAA6 protein similar to IAA6 protein GB:S5849 from<br>[Arabidopsis thaliana];supported by full-length cDNA: Ceres:147711.                                                          | 0.04542 | 0.84959 | 7.07277 | 7.07277 | 0        |
| 955504 | At1g75450 | 261109_at   | cytokinin oxidase, putative similar to GB:CAA77151 from [Zea mays]<br>(Plant J. 17 (6), 615-626 (1999))                                                                                     | 0.15817 | 0.83952 | 6.91068 | 6.91068 | 1.99E-05 |
| 948743 | At4g25420 | 254065_at   | gibberellin 20-oxidase - Arabidopsis thaliana                                                                                                                                               | 0.13703 | 0.82959 | 6.75438 | 6.75438 | 3.35E-07 |
| 948437 | At4g28720 | YUC8        | YUCCA8 - putative protein dimethylaniline monooxygenase (N-oxide-<br>forming), Sus scrofa domestica, PIR1:A33768                                                                            | 0.08538 | 0.82652 | 6.7069  | 6.7069  | 3.48E-19 |
| 961190 | At2g22810 | ACS4        | 1-aminocyclopropane-1-carboxylate synthase (ACS4) identical to<br>GB:U23481; supported by cDNA:<br>gi_12083215_gb_AF332404.1_AF332404                                                       | 0.14501 | 0.82347 | 6.65995 | 6.65995 | 2.85E-06 |
| 953791 | At1g02340 | HFR1        | unknown protein contains similarity to phytochrome interacting factor 3<br>GI:3929586 from [Arabidopsis thaliana]; supported by cDNA:<br>gi_11870114_gb_AF324245.1_AF324245                 | 0.08816 | 0.80059 | 6.3181  | 6.3181  | 7.87E-17 |
| 961174 | At2g44910 | ATHB4       | homeodomain transcription factor (ATHB-4)                                                                                                                                                   | 0.17104 | 0.79997 | 6.3092  | 6.3092  | 4.10E-04 |
| 960166 | At2g18010 | 265806_at   | putative auxin-regulated protein                                                                                                                                                            | 0.05966 | 0.79837 | 6.28599 | 6.28599 | 1.36E-37 |
| 954228 | At1g69570 | 259834_at   | H-protein promoter binding factor-2b nearly identical to H-protein<br>promoter binding factor-2b (Arabidopsis thaliana) GI:3386548;<br>supported by cDNA: gi_3386547_gb_AF079504.1_AF079504 | 0.10033 | 0.79265 | 6.20367 | 6.20367 | 1.22E-12 |
| 963299 | At1g35140 | 245757_at   | phosphate-induced (phi-1) protein, putative similar to phi-1<br>GB:BAA33810 GI:3759184 from [Nicotiana tabacum];supported by full-<br>length cDNA: Ceres:118937.                            | 0.15839 | 0.78511 | 6.09694 | 6.09694 | 1.09E-04 |
| 942556 | At5g57560 | TCH4        | TCH4 protein (gb AAA92363.1) ; supported by cDNA:<br>gi_14194112_gb_AF367262.1_AF367262                                                                                                     | 0.08867 | 0.775   | 5.95659 | 5.95659 | 1.47E-15 |
| 964006 | At2g23170 | 245076_at   | unknown protein                                                                                                                                                                             | 0.0869  | 0.76882 | 5.87246 | 5.87246 | 6.18E-16 |
| 943399 | At5g47370 | 248801_at   | homeobox-leucine zipper protein-like ; supported by cDNA:<br>gi_15450446_gb_AY052324.1_                                                                                                     | 0.06073 | 0.76016 | 5.75653 | 5.75653 | 8.08E-33 |
| 944690 | At5g18060 | 250012_x_at | auxin-induced protein-like                                                                                                                                                                  | 0.06223 | 0.75475 | 5.68524 | 5.68524 | 8.44E-31 |

|        |           |           |                                                                                                                                                                                         |         |         |         |         |          |
|--------|-----------|-----------|-----------------------------------------------------------------------------------------------------------------------------------------------------------------------------------------|---------|---------|---------|---------|----------|
| 958225 | At2g37030 | 263890_at | putative auxin-induced protein                                                                                                                                                          | 0.10122 | 0.74558 | 5.56644 | 5.56644 | 6.80E-11 |
| 942972 | At5g52900 | 248282_at | unknown protein ;supported by full-length cDNA: Ceres:148254.                                                                                                                           | 0.04303 | 0.72489 | 5.30755 | 5.30755 | 0        |
| 948574 | At4g27280 | 253915_at | putative protein centrin, <i>Marsilea vestita</i> ;supported by full-length cDNA: Ceres:13072.                                                                                          | 0.05608 | 0.71243 | 5.15744 | 5.15744 | 8.52E-34 |
| 947778 | At4g36110 | 253103_at | putative auxin-induced protein high similarity to auxin-induced protein 15A, soybean, PIR2:JQ1096; supported by cDNA: gi_13194817_gb_AF349524.1_AF349524                                | 0.14161 | 0.71184 | 5.15038 | 5.15038 | 7.80E-05 |
| 943709 | At5g43890 | YUC5      | YUCCA5 - dimethylaniline monooxygenase-like                                                                                                                                             | 0.13663 | 0.70692 | 5.09234 | 5.09234 | 3.84E-05 |
| 945609 | At5g02760 | PP2C      | protein phosphatase - like protein phosphatase 2C homolog, <i>Mesembryanthemum crystallinum</i> , EMBL:AF097667                                                                         | 0.05733 | 0.69634 | 4.96978 | 4.96978 | 7.18E-31 |
| 953709 | At3g03840 | 259331_at | putative auxin-induced protein similar to SAUR GB:BAA25434 [ <i>Raphanus sativus</i> ]                                                                                                  | 0.03478 | 0.67238 | 4.70304 | 4.70304 | 0        |
| 949810 | At4g08040 | 255177_at | strong similarity to 1-aminocyclopropane-1-carboxylic acid synthases                                                                                                                    | 0.15087 | 0.66557 | 4.62993 | 4.62993 | 0.001164 |
| 942112 | At5g62280 | 247474_at | putative protein predicted proteins, <i>Arabidopsis thaliana</i>                                                                                                                        | 0.0901  | 0.64443 | 4.40992 | 4.40992 | 3.03E-10 |
| 943739 | At5g44260 | 249065_at | putative protein similar to unknown protein (gb AAD10689.1); supported by cDNA: gi_14334449_gb_AY034916.1_                                                                              | 0.1447  | 0.64328 | 4.39826 | 4.39826 | 1.09E-03 |
| 963695 | At4g14560 | IAA1      | auxin-responsive protein IAA1 ;supported by full-length cDNA: Ceres:33860.                                                                                                              | 0.08809 | 0.63659 | 4.33103 | 4.33103 | 1.82E-10 |
| 951396 | At3g29370 | 256743_at | Expressed protein ; supported by full-length cDNA: Ceres: 22461.                                                                                                                        | 0.09035 | 0.63487 | 4.31386 | 4.31386 | 7.22E-10 |
| 943073 | At5g51810 | 248371_at | gibberellin 20-oxidase (emb CAA58294.1)                                                                                                                                                 | 0.12541 | 0.63378 | 4.30306 | 4.30306 | 6.87E-05 |
| 949357 | At4g13790 | 254685_at | SAUR-AC - like protein (small auxin up RNA) SAUR-AC1, <i>Arabidopsis thaliana</i> , S70188;supported by full-length cDNA: Ceres:8965.                                                   | 0.14976 | 0.61787 | 4.14829 | 4.14829 | 0.004055 |
| 946880 | At3g50340 | 252204_at | putative protein predicted protein, <i>Arabidopsis thaliana</i>                                                                                                                         | 0.03754 | 0.60316 | 4.01011 | 4.01011 | 0        |
| 941705 | At5g66590 | 247074_at | putative protein contains similarity to pathogenesis-related protein;supported by full-length cDNA: Ceres:2152.                                                                         | 0.09149 | 0.59946 | 3.97617 | 3.97617 | 1.64E-08 |
| 944978 | At5g12050 | 250327_at | putative serine rich protein predicted proteins, <i>Arabidopsis thaliana</i> ;supported by full-length cDNA: Ceres:36958.                                                               | 0.10447 | 0.59404 | 3.92684 | 3.92684 | 2.77E-06 |
| 962983 | At5g25190 | 246932_at | ethylene-responsive element - like protein ethylene-responsive element binding protein homolog, <i>Stylosanthes hamata</i> , EMBL:U91857; supported by cDNA: gi_15010715_gb_AY045659.1_ | 0.08942 | 0.58561 | 3.85129 | 3.85129 | 1.65E-08 |
| 952200 | At3g28420 | 257900_at | hypothetical protein predicted by genemark.hmm                                                                                                                                          | 0.0865  | 0.57869 | 3.79041 | 3.79041 | 6.78E-09 |
| 963364 | At5g04190 | 245696_at | phytochrome kinase substrate 1 - like protein                                                                                                                                           | 0.1088  | 0.56596 | 3.68094 | 3.68094 | 3.33E-05 |
| 960217 | At2g42380 | 265877_at | unknown protein ; supported by cDNA: gi_15100052_gb_AF401299.1_AF401299                                                                                                                 | 0.07738 | 0.56486 | 3.67163 | 3.67163 | 1.09E-10 |
| 947838 | At4g34770 | 253207_at | putative protein small auxin up-regulated RNA, <i>Malus domestica</i> , gb:Z93766                                                                                                       | 0.07576 | 0.54693 | 3.52317 | 3.52317 | 1.89E-10 |
| 943130 | At5g51190 | 248448_at | putative protein contains similarity to ethylene responsive element binding factor;supported by full-length cDNA: Ceres:2347.                                                           | 0.11557 | 0.53328 | 3.41412 | 3.41412 | 5.43E-04 |

|        |           |           |                                                                                                                                                              |         |         |         |         |          |
|--------|-----------|-----------|--------------------------------------------------------------------------------------------------------------------------------------------------------------|---------|---------|---------|---------|----------|
| 943913 | At5g41400 | 249306_at | RING zinc finger protein-like ;supported by full-length cDNA: Ceres:207148.                                                                                  | 0.08209 | 0.52616 | 3.35864 | 3.35864 | 3.92E-08 |
| 943496 | At5g46240 | 248888_at | potassium channel protein KAT1 (pir S32816) ; supported by cDNA: gi_166773_gb_M86990.1_ATHKAT1                                                               | 0.07682 | 0.52378 | 3.34024 | 3.34024 | 2.91E-09 |
| 964362 | At1g29440 | 257506_at | auxin-induced protein, putative similar to SP:P33083 from [Glycine max]                                                                                      | 0.03231 | 0.52327 | 3.33631 | 3.33631 | 0        |
| 956093 | At1g18400 | BEE1      | helix-loop-helix protein homolog, putative similar to helix-loop-helix protein homolog GB:BAA87957 GI:6520231 from [Arabidopsis thaliana]                    | 0.08639 | 0.50873 | 3.22648 | 3.22648 | 8.79E-07 |
| 954133 | At1g29460 | 259787_at | auxin-induced protein, putative similar to SP:P33083 from [Glycine max];supported by full-length cDNA: Ceres:147801.                                         | 0.05454 | 0.50872 | 3.22644 | 3.22644 | 9.12E-18 |
| 945276 | At5g07000 | 250657_at | steroid sulfotransferase-like protein                                                                                                                        | 0.03815 | 0.50692 | 3.21303 | 3.21303 | 4.40E-37 |
| 950307 | At3g29575 | 255723_at | hypothetical protein                                                                                                                                         | 0.11088 | 0.49484 | 3.12494 | 3.12494 | 1.04E-03 |
| 952152 | At3g23030 | IAA2      | auxin-inducible gene (IAA2) identical to auxin-inducible gene (IAA2) GB:AF027157 [Arabidopsis thaliana] (Plant Physiol. 115, 1730 (1997))                    | 0.04626 | 0.49465 | 3.12357 | 3.12357 | 1.14E-23 |
| 957573 | At1g10550 | 263207_at | putative endoxyloglucan transferase similar to xyloglucan endotransglycosylase-related protein XTR4 (pir S71223);supported by full-length cDNA: Ceres:27813. | 0.12339 | 0.49146 | 3.10067 | 3.10067 | 0.006681 |
| 961807 | At2g26710 | 267614_at | putative cytochrome P450                                                                                                                                     | 0.05387 | 0.47311 | 2.9724  | 2.9724  | 1.04E-15 |
| 950221 | At4g01250 | 255568_at | putative DNA-binding protein ; supported by cDNA: gi_15028172_gb_AY045909.1_                                                                                 | 0.06398 | 0.46632 | 2.92628 | 2.92628 | 1.17E-10 |
| 946099 | At3g59900 | 251436_at | putative protein hypothetical protein At2g44080 - Arabidopsis thaliana, EMBL:AC004005                                                                        | 0.07039 | 0.46129 | 2.89261 | 2.89261 | 1.64E-08 |
| 955287 | At1g02660 | 260915_at | hypothetical protein similar to hypothetical protein GB:CAB83109 GI:7362739 from [Arabidopsis thaliana]; supported by cDNA: gi_15081706_gb_AY048246.1_       | 0.04862 | 0.46019 | 2.8853  | 2.8853  | 2.68E-18 |
| 955780 | At1g21050 | 261456_at | hypothetical protein predicted by genemark.hmm;supported by full-length cDNA: Ceres:3200.                                                                    | 0.05206 | 0.45312 | 2.83868 | 2.83868 | 1.97E-15 |
| 961160 | At2g30040 | 266832_at | putative protein kinase contains a protein kinase domain profile (PDOC00100)                                                                                 | 0.05333 | 0.45237 | 2.83379 | 2.83379 | 1.26E-14 |
| 954119 | At1g29500 | 259773_at | auxin-induced protein, putative similar to SP:P33083 from [Glycine max]                                                                                      | 0.03211 | 0.4521  | 2.83207 | 2.83207 | 1.28E-41 |
| 952407 | At3g19380 | 258021_at | hypothetical protein predicted genemark;supported by full-length cDNA: Ceres:255040.                                                                         | 0.0529  | 0.44908 | 2.81242 | 2.81242 | 1.22E-14 |
| 954130 | At1g29450 | 259784_at | auxin-induced protein, putative similar to SP:P33083 from [Glycine max];supported by full-length cDNA: Ceres:29931.                                          | 0.04847 | 0.42626 | 2.66845 | 2.66845 | 9.73E-16 |
| 947626 | At4g38400 | 252997_at | putative pollen allergen pollen allergen - Pinus radiata, PID:g2935527; supported by cDNA: gi_14190354_gb_AF378855.1_AF378855                                | 0.05061 | 0.41779 | 2.61692 | 2.61692 | 8.06E-14 |



|        |           |             |                                                                                                                                                                    |         |         |         |         |          |
|--------|-----------|-------------|--------------------------------------------------------------------------------------------------------------------------------------------------------------------|---------|---------|---------|---------|----------|
| 945190 | At5g08130 | BIM1        | basic helix-loop-helix (bHLH) family protein involved in brassinosteroid signaling.                                                                                | 0.09024 | 0.4148  | 2.59899 | 2.59899 | 5.87E-04 |
| 960446 | At2g18790 | PHYB        | phytochrome B Identical to GB:X17342                                                                                                                               | 0.04899 | 0.41174 | 2.5807  | 2.5807  | 2.35E-14 |
| 963761 | At4g16515 | 245336_at   | Expressed protein ; supported by full-length cDNA: Ceres: 6580.                                                                                                    | 0.04634 | 0.39192 | 2.46557 | 2.46557 | 1.51E-14 |
| 949396 | At4g13260 | YUC2        | putative protein dimethylaniline monooxygenase (N-oxide-forming) (EC1.14.13.8) -Oryctolagus cuniculus,PID:g164989                                                  | 0.05935 | 0.3908  | 2.45923 | 2.45923 | 1.34E-08 |
| 954136 | At1g29430 | 259790_s_at | auxin-induced protein, putative similar to SP:P33083 from [Glycine max];supported by full-length cDNA: Ceres:4119.                                                 | 0.03145 | 0.38811 | 2.44402 | 2.44402 | 7.07E-32 |
| 955188 | At1g21910 | 260856_at   | TINY-like protein similar to TINY GB:CAA64359 GI:1246403 from [Arabidopsis thaliana];supported by full-length cDNA: Ceres:19721.                                   | 0.088   | 0.38121 | 2.40555 | 2.40555 | 0.001164 |
| 947577 | At4g38850 | 252970_at   | small auxin up RNA (SAUR-AC1) ;supported by full-length cDNA: Ceres:14973.                                                                                         | 0.04685 | 0.378   | 2.38782 | 2.38782 | 3.45E-13 |
| 955971 | At1g33055 | 261567_at   | Expressed protein ; supported by cDNA: gi_13877526_gb_AF370464.1_AF370464                                                                                          | 0.09347 | 0.37378 | 2.3647  | 2.3647  | 0.005799 |
| 958603 | At1g09250 | 264264_at   | unknown protein ESTs gb T04610, gb N38459, gb T45174, gb R30481 and gb N64971 come from this gene;supported by full-length cDNA: Ceres:9228.                       | 0.06287 | 0.37008 | 2.34468 | 2.34468 | 8.83E-07 |
| 956054 | At1g50040 | 261658_at   | hypothetical protein predicted by genemark.hmm                                                                                                                     | 0.0703  | 0.36172 | 2.29994 | 2.29994 | 4.38E-05 |
| 948728 | At4g25260 | 254110_at   | putative protein pectinesterase - Citrus sinensis, PID:g2098705                                                                                                    | 0.05064 | 0.35825 | 2.28166 | 2.28166 | 5.22E-10 |
| 949514 | At4g11280 | ACS6        | ACC synthase (AtACS-6) ; supported by cDNA: gi_16226285_gb_AF428292.1_AF428292                                                                                     | 0.06876 | 0.35412 | 2.26006 | 2.26006 | 4.30E-05 |
| 947298 | At3g44260 | 252679_at   | CCR4-associated factor 1-like protein CAF1_MOUSE CCR4-ASSOCIATED FACTOR 1 - Mus musculus, SWISSPROT:CAF1_MOUSE; supported by cDNA: gi_15292828_gb_AY050848.1_      | 0.07738 | 0.35127 | 2.24529 | 2.24529 | 7.47E-04 |
| 946241 | At3g58120 | 251575_at   | putative protein basic leucine zipper transcription activator shoot-forming PKSF1 - Paulownia kawakamii, EMBL:AF046934;supported by full-length cDNA: Ceres:34553. | 0.01933 | 0.34899 | 2.23354 | 2.23354 | 0        |
| 963768 | At4g16770 | 245307_at   | gibberellin oxidase-like protein non-consensus GG acceptor splice site at exon 8; supported by cDNA: gi_13265536_gb_AF324704.2_AF324704                            | 0.07082 | 0.34677 | 2.22212 | 2.22212 | 1.45E-04 |
| 963720 | At4g17460 | 245362_at   | homeobox-leucine zipper protein HAT1 (hd-zip protein 1) ;supported by full-length cDNA: Ceres:34167.                                                               | 0.07806 | 0.34431 | 2.20959 | 2.20959 | 0.001164 |
| 957566 | At1g54120 | 263151_at   | hypothetical protein predicted by genemark.hmm;supported by full-length cDNA: Ceres:94743.                                                                         | 0.07426 | 0.34039 | 2.18971 | 2.18971 | 6.19E-04 |
| 951685 | At3g19680 | 257076_at   | unknown protein                                                                                                                                                    | 0.02304 | 0.33662 | 2.1708  | 2.1708  | 0        |
| 950403 | At4g10150 | 255802_s_at | putative protein RING-H2 finger protein RHA1a, Arabidopsis thaliana,AF078683                                                                                       | 0.06542 | 0.33172 | 2.14643 | 2.14643 | 6.38E-05 |
| 947379 | At3g42800 | 252765_at   | putative protein hypothetical proteins - Arabidopsis thaliana                                                                                                      | 0.07067 | 0.3303  | 2.13945 | 2.13945 | 4.14E-04 |

|        |           |           |                                                                                                                                                                           |         |         |         |         |          |
|--------|-----------|-----------|---------------------------------------------------------------------------------------------------------------------------------------------------------------------------|---------|---------|---------|---------|----------|
| 961547 | At2g39870 | 267339_at | unknown protein ; supported by cDNA:<br>gi_13877742_gb_AF370134.1_AF370134                                                                                                | 0.04022 | 0.32683 | 2.1224  | 2.1224  | 2.19E-13 |
| 949688 | At4g08950 | 255064_at | putative phi-1-like phosphate-induced protein ;supported by full-length<br>cDNA: Ceres:3552.                                                                              | 0.07644 | 0.32665 | 2.12154 | 2.12154 | 0.002152 |
| 955401 | At1g01260 | 261050_at | transcription factor MYC7E, putative similar to transcription factor<br>MYC7E GB:AAD15818 GI:4321762 from [Zea mays]                                                      | 0.0483  | 0.32079 | 2.09312 | 2.09312 | 9.33E-09 |
| 948567 | At4g27260 | 253908_at | GH3 like protein GH3 protein, Glycine max., PIR2:S17433                                                                                                                   | 0.05077 | 0.32058 | 2.09207 | 2.09207 | 6.89E-08 |
| 961537 | At2g40000 | 267357_at | putative nematode-resistance protein ;supported by full-length cDNA:<br>Ceres:35056.                                                                                      | 0.07848 | 0.31771 | 2.07829 | 2.07829 | 0.004959 |
| 956885 | At1g21820 | 262488_at | unknown protein EST gb AA586241 comes from this gene                                                                                                                      | 0.04625 | 0.31679 | 2.07391 | 2.07391 | 2.42E-09 |
| 954129 | At1g29510 | 259783_at | auxin-induced protein, putative similar to SP:P33083 from [Glycine<br>max];supported by full-length cDNA: Ceres:9311.                                                     | 0.02612 | 0.31526 | 2.06663 | 2.06663 | 1.63E-30 |
| 947325 | At3g44610 | 252646_at | protein kinase-like protein protein kinase - Solanum berthaultii,<br>EMBL:X97980                                                                                          | 0.06134 | 0.3112  | 2.04736 | 2.04736 | 6.33E-05 |
| 947827 | At4g34760 | 253255_at | putative auxin-regulated protein auxin-induced protein X15, Glycine<br>max, PIR2:JQ1097;supported by full-length cDNA: Ceres:10510.                                       | 0.03856 | 0.30785 | 2.03167 | 2.03167 | 6.61E-13 |
| 946167 | At3g58640 | 251526_at | putative protein several serine/threonine-specific protein kinases                                                                                                        | 0.02417 | 0.30465 | 2.01672 | 2.01672 | 2.77E-33 |
| 960973 | At2g46310 | 266606_at | putative AP2 domain transcription factor                                                                                                                                  | 0.06966 | 0.30343 | 2.01106 | 2.01106 | 0.001164 |
| 956638 | At1g70940 | 262263_at | auxin transport protein REH1, putative similar to auxin transport protein<br>REH1 GI:3377509 from [Oryza sativa]; supported by cDNA:<br>gi_5817300_gb_AF087818.1_AF087818 | 0.0471  | 0.30221 | 2.00542 | 2.00542 | 3.80E-08 |
| 957228 | At1g14920 | 262850_at | signal response protein (GAI) identical to GAI GB:CAA75492<br>GI:2569938 [Arabidopsis thaliana] (Genes Dev. In press); supported by<br>cDNA: gi_16648833_gb_AY058194.1_   | 0.05094 | 0.29496 | 1.97224 | 1.97224 | 1.54E-06 |
| 958046 | At1g04240 | IAA3      | putative auxin-induced protein AUX2-11 Match to Arabidopsis IAA3<br>(gb U18406). EST gb T04296 comes from this gene; supported by<br>cDNA: gi_972910_gb_U18406.1_ATU18406 | 0.03288 | 0.29462 | 1.97069 | 1.97069 | 2.30E-16 |
| 957387 | At1g54200 | 263002_at | hypothetical protein predicted by genemark.hmm                                                                                                                            | 0.07456 | 0.29301 | 1.96341 | 1.96341 | 0.008483 |
| 957360 | At1g23340 | 263042_at | conserved hypothetical protein protein predicted by genemark.hmm                                                                                                          | 0.05072 | 0.28283 | 1.91792 | 1.91792 | 4.82E-06 |
| 955579 | At1g32920 | 261193_at | unknown protein ; supported by cDNA: gi_15450636_gb_AY052686.1_                                                                                                           | 0.06104 | 0.27498 | 1.88358 | 1.88358 | 8.63E-04 |
| 946869 | At3g50060 | 252193_at | R2R3-MYB transcription factor ; supported by cDNA:<br>gi_15983427_gb_AF424588.1_AF424588                                                                                  | 0.058   | 0.27429 | 1.88056 | 1.88056 | 3.23E-04 |
| 963920 | At2g47440 | 245176_at | unknown protein similar to GP 2104534 AF001308 (T10M13.11)                                                                                                                | 0.05325 | 0.27313 | 1.87554 | 1.87554 | 4.74E-05 |
| 946462 | At3g54810 | 251861_at | putative protein GATA transcription factor 3, Arabidopsis thaliana,<br>Y13650; supported by cDNA: gi_15724333_gb_AF412107.1_AF412107                                      | 0.06327 | 0.26995 | 1.86186 | 1.86186 | 0.002152 |
| 959567 | At2g43060 | 265245_at | unknown protein                                                                                                                                                           | 0.06195 | 0.26928 | 1.85902 | 1.85902 | 0.001164 |

|        |           |           |                                                                                                                                                        |         |         |         |         |          |
|--------|-----------|-----------|--------------------------------------------------------------------------------------------------------------------------------------------------------|---------|---------|---------|---------|----------|
| 952279 | At3g17100 | 257894_at | unknown protein ; supported by cDNA: gi_15010765_gb_AY045684.1_                                                                                        | 0.05872 | 0.25471 | 1.79768 | 1.79768 | 0.001164 |
| 948483 | At4g28240 | 253812_at | putative wound induced protein wound-induced protein - tomato (fragment), PIR2:S19773;supported by full-length cDNA: Ceres:20161.                      | 0.04443 | 0.24836 | 1.77159 | 1.77159 | 4.54E-06 |
| 953480 | At3g02170 | 259104_at | unknown protein ;supported by full-length cDNA: Ceres:22225.                                                                                           | 0.03201 | 0.24753 | 1.76819 | 1.76819 | 4.31E-12 |
| 948053 | At4g32290 | 253475_at | putative protein predicted protein, Arabidopsis thaliana, PATCHX:G2252634                                                                              | 0.04429 | 0.24711 | 1.76649 | 1.76649 | 4.78E-06 |
| 946283 | At3g57795 | 251601_at | Expressed protein ; supported by full-length cDNA: Ceres: 19033.                                                                                       | 0.04887 | 0.24668 | 1.76473 | 1.76473 | 7.02E-05 |
| 951749 | At3g15210 | AtERF4    | ethylene responsive element binding factor 4 (AtERF4) identical to GB:BAA32421 from [Arabidopsis thaliana];supported by full-length cDNA: Ceres:22775. | 0.04528 | 0.24103 | 1.74195 | 1.74195 | 1.86E-05 |
| 951954 | At3g25710 | 257642_at | putative HLH DNA-binding protein contains Pfam profile: PF00010 helix-loop-helix DNA-binding domain;supported by full-length cDNA: Ceres:247881.       | 0.04072 | 0.24024 | 1.73875 | 1.73875 | 8.28E-07 |
| 943327 | At5g48900 | 248681_at | pectate lyase non-consensus AG donor splice site at exon 2; supported by full-length cDNA: Ceres: 21311.                                               | 0.0583  | 0.23831 | 1.73107 | 1.73107 | 0.004055 |
| 963750 | At4g14130 | XTR7      | xyloglucan endotransglycosylase-related protein XTR-7 ;supported by full-length cDNA: Ceres:33554.                                                     | 0.04516 | 0.23671 | 1.72469 | 1.72469 | 2.79E-05 |
| 962639 | At5g15580 | 246562_at | putative protein unknown protein F14P3.18 - Arabidopsis thaliana, EMBL:AC009755                                                                        | 0.04365 | 0.22843 | 1.69211 | 1.69211 | 2.85E-05 |
| 946377 | At3g55740 | ProT2     | proline transporter 2                                                                                                                                  | 0.03343 | 0.22805 | 1.69064 | 1.69064 | 2.87E-09 |
| 947805 | At4g35470 | 253136_at | putative protein leucine-rich protein - Helianthus annuus (common sunflower),PIR:T12704                                                                | 0.02854 | 0.22332 | 1.67232 | 1.67232 | 2.17E-12 |
| 963319 | At1g73540 | 245777_at | unknown protein contains similarity to diphosphoinositol polyphosphate phosphohydrolase GI:3978224 from [Homo sapiens]                                 | 0.05001 | 0.22306 | 1.6713  | 1.6713  | 1.04E-03 |
| 945272 | At5g06930 | 250653_at | putative protein strong similarity to unknown protein (gb AAD23715.1)                                                                                  | 0.02756 | 0.21896 | 1.65562 | 1.65562 | 8.85E-13 |
| 958273 | At2g36220 | 263931_at | unknown protein ;supported by full-length cDNA: Ceres:12251.                                                                                           | 0.04803 | 0.21795 | 1.65178 | 1.65178 | 7.50E-04 |
| 950055 | At4g03190 | FBL18     | F-box protein GRR1-like protein 1, AtFBL18 almost identical to GRR1-like protein 1 GI:12658970 from [Arabidopsis thaliana]                             | 0.0376  | 0.21538 | 1.64202 | 1.64202 | 2.19E-06 |
| 961495 | At2g23760 | 267298_at | putative homeodomain transcription factor ; supported by cDNA: gi_13877512_gb_AF353092.1_AF353092                                                      | 0.05426 | 0.2135  | 1.63492 | 1.63492 | 0.007572 |
| 952545 | At3g13980 | 258196_at | hypothetical protein predicted by genemark.hmm                                                                                                         | 0.05211 | 0.21311 | 1.63346 | 1.63346 | 0.004055 |
| 952225 | At3g12920 | 257858_at | hypothetical protein predicted by genefinder;supported by full-length cDNA: Ceres:924.                                                                 | 0.03374 | 0.21143 | 1.62717 | 1.62717 | 9.15E-08 |
| 944270 | At5g37770 | 249583_at | CALMODULIN-RELATED PROTEIN 2, TOUCH-INDUCED (TCH2) ;supported by full-length cDNA: Ceres:25475.                                                        | 0.04975 | 0.20846 | 1.61609 | 1.61609 | 0.003153 |
| 950517 | At1g67050 | 255854_at | unknown protein ;supported by full-length cDNA: Ceres:12461.                                                                                           | 0.0415  | 0.20798 | 1.61427 | 1.61427 | 8.31E-05 |
| 943790 | At5g43700 | IAA4      | auxin-induced protein AUX2-11 (sp P33077)                                                                                                              | 0.03556 | 0.19893 | 1.58098 | 1.58098 | 4.50E-06 |

| 947535                                                                                                                                                                                                                                                                                                    | At4g39400   | BRI1             | brassinosteroid insensitive 1 gene (BRI1)                                                                                                      | 0.04839     | 0.19809     | 1.57793 | 1.57793     | 0.004055 |
|-----------------------------------------------------------------------------------------------------------------------------------------------------------------------------------------------------------------------------------------------------------------------------------------------------------|-------------|------------------|------------------------------------------------------------------------------------------------------------------------------------------------|-------------|-------------|---------|-------------|----------|
| 946165                                                                                                                                                                                                                                                                                                    | At3g58620   | 251584_at        | putative protein At2g42580 - Arabidopsis thaliana, EMBL:AC007087                                                                               | 0.0364      | 0.19636     | 1.57167 | 1.57167     | 1.26E-05 |
| 953043                                                                                                                                                                                                                                                                                                    | At3g08640   | 258692_at        | unknown protein                                                                                                                                | 0.03224     | 0.1952      | 1.56746 | 1.56746     | 3.35E-07 |
| 954598                                                                                                                                                                                                                                                                                                    | At1g68550   | 260209_at        | putative AP2 domain transcription factor contains Pfam profile: PF00847 AP2 domain; supported by cDNA: gi_16604674_gb_AY059782.1_              | 0.04292     | 0.19388     | 1.56271 | 1.56271     | 8.21E-04 |
| 949665                                                                                                                                                                                                                                                                                                    | At4g09890   | 255028_at        | putative protein Arabidopsis thaliana chromosome II BAC T30B22 genomic sequence, gene T30B22.22, PID:g2529679                                  | 0.02389     | 0.18674     | 1.53723 | 1.53723     | 2.31E-12 |
| 948730                                                                                                                                                                                                                                                                                                    | At4g25280   | 254052_at        | UMP/CMP kinase like protein UMP/CMP kinase - Arabidopsis thaliana,PID:g2121275                                                                 | 0.04414     | 0.18244     | 1.52208 | 1.52208     | 0.004055 |
| 960621                                                                                                                                                                                                                                                                                                    | At2g46660   | 266321_at        | putative cytochrome P450                                                                                                                       | 0.03504     | 0.18235     | 1.52179 | 1.52179     | 3.30E-05 |
| 942108                                                                                                                                                                                                                                                                                                    | At5g62220   | 247470_at        | putative protein various predicted proteins, Arabidopsis thaliana                                                                              | 0.02099     | 0.17867     | 1.50894 | 1.50894     | 1.01E-14 |
| <b>Shade-regulated in sav3 seedlings.</b>                                                                                                                                                                                                                                                                 |             |                  |                                                                                                                                                |             |             |         |             |          |
| <b>Down-regulated genes identified in response to 1h of W+FR in sav3 mutant seedlings. "Down-regulated" indicates genes that have significantly (BH&lt;0.05) lower signal (Fold change &lt; 1.5) after 1h of W+FR compared to their levels at time 0 (before starting the simulated shade treatment).</b> |             |                  |                                                                                                                                                |             |             |         |             |          |
| Sequence ID                                                                                                                                                                                                                                                                                               | Accession # | Sequence Name(s) | Sequence Description                                                                                                                           | Log (Error) | Log (Ratio) | Ratio   | Fold Change | BH       |
| 956329                                                                                                                                                                                                                                                                                                    | At1g22550   | 261924_at        | peptide transporter, putative similar to peptide transporter GI:9757725 from [Arabidopsis thaliana]                                            | 0.03081     | 0.17726     | 1.50404 | -1.50404    | 2.94E-06 |
| 947096                                                                                                                                                                                                                                                                                                    | At3g47420   | 252414_at        | putative protein sn-glycerol-3-phosphate permease - Haemophilus influenzae,PID:g3603157; supported by cDNA: gi_13430515_gb_AF360170.1_AF360170 | 0.0375      | 0.1785      | 1.50833 | -1.50833    | 3.81E-04 |
| 943816                                                                                                                                                                                                                                                                                                    | At5g42760   | 249191_at        | putative protein similar to unknown protein (pir  F70811);supported by full-length cDNA: Ceres:111265.                                         | 0.05677     | 0.19494     | 1.56654 | -1.56654    | 0.04836  |
| 963765                                                                                                                                                                                                                                                                                                    | At4g15630   | 245304_at        | hypothetical protein ; supported by full-length cDNA: Ceres: 933.                                                                              | 0.02644     | 0.19543     | 1.56829 | -1.56829    | 1.22E-10 |
| 961524                                                                                                                                                                                                                                                                                                    | At2g44230   | 267344_at        | hypothetical protein predicted by genefinder; supported by cDNA: gi_15450386_gb_AY052294.1_                                                    | 0.04947     | 0.19557     | 1.56882 | -1.56882    | 0.00931  |
| 960729                                                                                                                                                                                                                                                                                                    | At2g38750   | ANNAT4           | putative annexin ;supported by full-length cDNA: Ceres:32721.                                                                                  | 0.04785     | 0.19597     | 1.57026 | -1.57026    | 0.005431 |
| 948764                                                                                                                                                                                                                                                                                                    | At4g24780   | 254119_at        | putative pectate lyase pectate lyase, Musa acuminata, PATX:E209876;supported by full-length cDNA: Ceres:36681.                                 | 0.05104     | 0.19733     | 1.57517 | -1.57517    | 0.012005 |
| 944788                                                                                                                                                                                                                                                                                                    | At5g15310   | ATMYB16          | myb-related protein - like myb-related protein 1, garden petunia, PIR:S26605                                                                   | 0.04831     | 0.20476     | 1.60237 | -1.60237    | 0.002982 |
| 956611                                                                                                                                                                                                                                                                                                    | At1g53870   | 262259_s_at      | hypothetical protein predicted by genemark.hmm;supported by full-length cDNA: Ceres:1094.                                                      | 0.05499     | 0.21536     | 1.64194 | -1.64194    | 0.010113 |
| 957334                                                                                                                                                                                                                                                                                                    | At1g75710   | 262969_at        | unknown protein                                                                                                                                | 0.04499     | 0.22126     | 1.66439 | -1.66439    | 1.89E-04 |

|        |           |           |                                                                                                                                                       |         |         |         |          |          |
|--------|-----------|-----------|-------------------------------------------------------------------------------------------------------------------------------------------------------|---------|---------|---------|----------|----------|
| 942870 | At5g54130 | 248191_at | putative protein similar to unknown protein (gb AAC24386.1)                                                                                           | 0.06654 | 0.23573 | 1.7208  | -1.7208  | 0.035641 |
| 950807 | At1g51700 | ADOF1     | dof zinc finger protein identical to dof zinc finger protein [Arabidopsis thaliana] GI:3608261; supported by cDNA: gi_3608260_dbj_AB017564.1_AB017564 | 0.06485 | 0.23804 | 1.72996 | -1.72996 | 0.023295 |
| 960280 | At2g15050 | LTP       | putative lipid transfer protein                                                                                                                       | 0.0145  | 0.24179 | 1.74498 | -1.74498 | 0        |
| 956567 | At1g74940 | 262170_at | hypothetical protein predicted by genemark.hmm;supported by full-length cDNA: Ceres:24864.                                                            | 0.03982 | 0.2447  | 1.75671 | -1.75671 | 3.64E-07 |
| 947259 | At3g44990 | XTR8      | xyloglucan endo-transglycosylase ; supported by cDNA: gi_15810248_gb_AY056163.1_                                                                      | 0.05357 | 0.25558 | 1.80129 | -1.80129 | 3.63E-04 |
| 948984 | At4g21990 | APR3      | PRH26 protein ;supported by full-length cDNA: Ceres:36866.                                                                                            | 0.0516  | 0.26186 | 1.82752 | -1.82752 | 8.94E-05 |
| 950790 | At1g51805 | 256168_at | receptor protein kinase, putative contains Pfam profiles: PF00069: Eukaryotic protein kinase domain, multiple PF00560: Leucine Rich Repeat            | 0.03642 | 0.26445 | 1.83843 | -1.83843 | 3.03E-10 |
| 954728 | At1g70560 | TAA1      | putative alliinase similar to alliinase precursor GB:AAD26853 [Allium cepa]                                                                           | 0.05813 | 0.28296 | 1.91851 | -1.91851 | 2.36E-04 |
| 946631 | At3g52740 | 252010_at | hypothetical protein ; supported by cDNA: gi_15450654_gb_AY052695.1_                                                                                  | 0.08907 | 0.31302 | 2.05599 | -2.05599 | 0.038602 |
| 943916 | At5g41410 | BEL1      | homeotic protein BEL1 homolog ; supported by cDNA: gi_15146192_gb_AY049237.1_                                                                         | 0.06728 | 0.31851 | 2.08214 | -2.08214 | 4.25E-04 |
| 941833 | At5g64770 | 247252_at | unknown protein                                                                                                                                       | 0.06519 | 0.33131 | 2.14443 | -2.14443 | 8.71E-05 |
| 961331 | At2g23550 | MES6      | putative acetone-cyanohydrin lyase                                                                                                                    | 0.10345 | 0.36006 | 2.29121 | -2.29121 | 0.04193  |
| 947308 | At3g44450 | 252661_at | putative protein                                                                                                                                      | 0.08385 | 0.38364 | 2.419   | -2.419   | 8.33E-04 |

**Up-regulated genes identified in response to 1h of W+FR in sav3 mutant seedlings. "Up-regulated" indicates genes that have significantly (BH<0.05) higher signal (Fold change > 1.5) after 1h of W+FR compared to their levels at time 0 (before starting the simulated shade treatment).**

| Sequence ID | Accession # | Sequence Name(s) | Sequence Description                                                                                                                                                                     | Log (Error) | Log (Ratio) | Ratio   | Fold Change | BH       |
|-------------|-------------|------------------|------------------------------------------------------------------------------------------------------------------------------------------------------------------------------------------|-------------|-------------|---------|-------------|----------|
| 947650      | At4g37770   | ACS8             | 1-aminocyclopropane-1-carboxylate synthase - like protein 1-aminocyclopropane-1-carboxylate synthase,Arabidopsis thaliana, S71174; supported by cDNA: gi_12247996_gb_AF334712.1_AF334712 | 0.29205     | -1.42291    | 0.03776 | 26.47975    | 2.32E-04 |
| 958701      | At1g04180   | 264323_at        | putative dimethylaniline monooxygenase                                                                                                                                                   | 0.08978     | -1.40553    | 0.03931 | 25.4407     | 0        |
| 958331      | At2g42870   | PAR1             | unknown protein ;supported by full-length cDNA: Ceres:102453.                                                                                                                            | 0.13641     | -1.34676    | 0.045   | 22.22088    | 9.60E-20 |
| 963796      | At4g16780   | ATHB2            | DNA-binding homeotic protein Athb-2 ; supported by cDNA: gi_166751_gb_M90394.1_ATHHOMEOA                                                                                                 | 0.08795     | -1.25624    | 0.05543 | 18.04007    | 0        |
| 948061      | At4g32280   | IAA29            | Expressed protein ; supported by cDNA: gi_14190492_gb_AF380646.1_AF380646                                                                                                                | 0.11686     | -1.16054    | 0.0691  | 14.47241    | 6.35E-20 |

|        |           |             |                                                                                                                                                                       |         |          |         |         |          |
|--------|-----------|-------------|-----------------------------------------------------------------------------------------------------------------------------------------------------------------------|---------|----------|---------|---------|----------|
| 945281 | At5g07010 | ST2A        | steroid sulfotransferase-like protein ;supported by full-length cDNA: Ceres:124067.                                                                                   | 0.09732 | -0.92573 | 0.11865 | 8.42812 | 2.90E-18 |
| 953791 | At1g02340 | HFR1        | unknown protein contains similarity to phytochrome interacting factor 3 GI:3929586 from [Arabidopsis thaliana]; supported by cDNA: gi_11870114_gb_AF324245.1_AF324245 | 0.09933 | -0.92268 | 0.11949 | 8.36919 | 2.08E-17 |
| 948437 | At4g28720 | 253794_at   | putative protein dimethylaniline monooxygenase (N-oxide-forming), Sus scrofa domestica, PIR1:A33768                                                                   | 0.08462 | -0.8688  | 0.13527 | 7.39272 | 2.27E-21 |
| 955504 | At1g75450 | CKX5        | cytokinin oxidase, putative similar to GB:CAA77151 from [Zea mays] (Plant J. 17 (6), 615-626 (1999))                                                                  | 0.18871 | -0.84481 | 0.14295 | 6.99537 | 1.27E-03 |
| 943739 | At5g44260 | 249065_at   | putative protein similar to unknown protein (gb AAD10689.1); supported by cDNA: gi_14334449_gb_AY034916.1_                                                            | 0.13879 | -0.82669 | 0.14904 | 6.70957 | 1.01E-06 |
| 943709 | At5g43890 | YUC5        | dimethylaniline monooxygenase-like                                                                                                                                    | 0.09013 | -0.78651 | 0.16349 | 6.11655 | 2.72E-15 |
| 944978 | At5g12050 | 250327_at   | putative serine rich protein predicted proteins, Arabidopsis thaliana;supported by full-length cDNA: Ceres:36958.                                                     | 0.0598  | -0.77865 | 0.16648 | 6.00689 | 2.63E-35 |
| 945604 | At5g02580 | 251012_at   | putative protein ;supported by full-length cDNA: Ceres:16476.                                                                                                         | 0.12656 | -0.7767  | 0.16722 | 5.98    | 3.76E-07 |
| 961174 | At2g44910 | ATHB4       | homeodomain transcription factor (ATHB-4)                                                                                                                             | 0.13383 | -0.74727 | 0.17895 | 5.58824 | 6.99E-06 |
| 944690 | At5g18060 | 250012_x_at | auxin-induced protein-like                                                                                                                                            | 0.0795  | -0.73807 | 0.18278 | 5.4711  | 2.08E-17 |
| 959648 | At2g28400 | 265276_at   | hypothetical protein predicted by genscan and genefinder                                                                                                              | 0.13297 | -0.71918 | 0.19091 | 5.23815 | 1.77E-05 |
| 945605 | At5g02540 | 251013_at   | putative protein various predicted proteins, Brassica rapa, Arabidopsis thaliana;supported by full-length cDNA: Ceres:26538.                                          | 0.06424 | -0.68175 | 0.20809 | 4.80567 | 6.64E-23 |
| 943496 | At5g46240 | KAT1        | potassium channel protein KAT1 (pir  S32816) ; supported by cDNA: gi_166773_gb_M86990.1_ATHKAT1                                                                       | 0.03508 | -0.6808  | 0.20855 | 4.7951  | 0        |
| 945276 | At5g07000 | ST2B        | steroid sulfotransferase-like protein                                                                                                                                 | 0.04414 | -0.67353 | 0.21206 | 4.71558 | 0        |
| 942556 | At5g57560 | TCH4        | TCH4 protein (gb AAA92363.1) ; supported by cDNA: gi_14194112_gb_AF367262.1_AF367262                                                                                  | 0.03546 | -0.60069 | 0.25079 | 3.98737 | 0        |
| 957650 | At1g10560 | PUB18       | putative zinc-binding protein similar to zinc-binding protein (gij 3249068)                                                                                           | 0.1583  | -0.59902 | 0.25176 | 3.97211 | 0.015552 |
| 950307 | At3g29575 | AFP3        | hypothetical protein                                                                                                                                                  | 0.10041 | -0.58633 | 0.25922 | 3.85768 | 1.93E-06 |
| 944084 | At5g39860 | PRE1        | putative protein putative DNA-binding protein - Arabidopsis thaliana, EMBL:AC011765;supported by full-length cDNA: Ceres:4734.                                        | 0.1432  | -0.56592 | 0.2717  | 3.68059 | 0.00931  |
| 945642 | At5g02200 | FHL         | hypothetical protein                                                                                                                                                  | 0.11099 | -0.55862 | 0.2763  | 3.6193  | 1.08E-04 |
| 953710 | At3g03830 | 259332_at   | putative auxin-induced protein similar to SAUR GB:BAA25434 [Raphanus sativus]                                                                                         | 0.13098 | -0.55837 | 0.27646 | 3.61719 | 0.002982 |
| 963299 | At1g35140 | PHI-1       | phosphate-induced (phi-1) protein, putative similar to phi-1 GB:BAA33810 GI:3759184 from [Nicotiana tabacum];supported by full-length cDNA: Ceres:118937.             | 0.08111 | -0.53654 | 0.29071 | 3.43987 | 2.12E-08 |
| 955137 | At1g15045 | 260741_at   | hypothetical protein contains Pfam profile: PF00117 Glutamine amidotransferase class-I                                                                                | 0.1362  | -0.53453 | 0.29206 | 3.42395 | 0.010113 |

|        |           |           |                                                                                                                                                                                       |         |          |         |         |          |
|--------|-----------|-----------|---------------------------------------------------------------------------------------------------------------------------------------------------------------------------------------|---------|----------|---------|---------|----------|
| 960217 | At2g42380 | BZIP34    | unknown protein ; supported by cDNA:<br>gi_15100052_gb_AF401299.1_AF401299                                                                                                            | 0.09419 | -0.53044 | 0.29482 | 3.3919  | 5.41E-06 |
| 950221 | At4g01250 | WRKY22    | putative DNA-binding protein ; supported by cDNA:<br>gi_15028172_gb_AY045909.1_                                                                                                       | 0.07528 | -0.52418 | 0.2991  | 3.34332 | 2.17E-09 |
| 941754 | At5g66080 | PP2C      | protein phosphatase 2C-like protein                                                                                                                                                   | 0.10667 | -0.49591 | 0.31922 | 3.13266 | 6.13E-04 |
| 953709 | At3g03840 | 259331_at | putative auxin-induced protein similar to SAUR GB:BAA25434<br>[Raphanus sativus]                                                                                                      | 0.09502 | -0.48356 | 0.32843 | 3.04483 | 8.55E-05 |
| 962983 | At5g25190 | 246932_at | ethylene-responsive element - like protein ethylene-responsive element<br>binding protein homolog, Stylosanthes hamata, EMBL:U91857;<br>supported by cDNA: gi_15010715_gb_AY045659.1_ | 0.12101 | -0.48279 | 0.32901 | 3.03944 | 0.008448 |
| 942112 | At5g62280 | 247474_at | putative protein predicted proteins, Arabidopsis thaliana                                                                                                                             | 0.09067 | -0.48138 | 0.33008 | 3.02955 | 2.92E-05 |
| 941705 | At5g66590 | 247074_at | putative protein contains similarity to pathogenesis-related<br>protein;supported by full-length cDNA: Ceres:2152.                                                                    | 0.12407 | -0.47516 | 0.33484 | 2.98647 | 0.013922 |
| 945190 | At5g08130 | BIM1      | basic helix-loop-helix (bHLH) family protein involved in brassinosteroid<br>signaling.                                                                                                | 0.07762 | -0.47384 | 0.33586 | 2.97742 | 4.52E-07 |
| 952152 | At3g23030 | IAA2      | auxin-inducible gene (IAA2) identical to auxin-inducible gene (IAA2)<br>GB:AF027157 [Arabidopsis thaliana] (Plant Physiol. 115, 1730 (1997))                                          | 0.06012 | -0.46221 | 0.34497 | 2.89878 | 1.37E-11 |
| 952778 | At3g15540 | IAA19     | early auxin-induced protein, IAA19 identical to IAA19 GB:AAB84356<br>from [Arabidopsis thaliana]; supported by full-length cDNA: Ceres:<br>94231.                                     | 0.0926  | -0.44818 | 0.3563  | 2.80659 | 2.67E-04 |
| 947838 | At4g34770 | 253207_at | putative protein small auxin up-regulated RNA, Malus domestica,<br>gb:Z93766                                                                                                          | 0.06761 | -0.44791 | 0.35653 | 2.80485 | 2.02E-08 |
| 945609 | At5g02760 | PP2C      | protein phosphatase - like protein protein phosphatase 2C homolog,<br>Mesembryanthemum crystallinum, EMBL:AF097667                                                                    | 0.06129 | -0.44363 | 0.36006 | 2.77734 | 3.46E-10 |
| 949396 | At4g13260 | YUC2      | putative protein dimethylaniline monooxygenase (N-oxide-forming)<br>(EC1.14.13.8) -Oryctolagus cuniculus,PID:g164989                                                                  | 0.04911 | -0.44093 | 0.3623  | 2.76011 | 3.12E-16 |
| 960446 | At2g18790 | PHYB      | phytochrome B Identical to GB:X17342                                                                                                                                                  | 0.04763 | -0.43579 | 0.36662 | 2.72764 | 6.89E-17 |
| 953394 | At3g07350 | 259015_at | unknown protein similar to hypothetical protein GB:AAC17612<br>[Arabidopsis thaliana];supported by full-length cDNA: Ceres:251012.                                                    | 0.10825 | -0.42895 | 0.37243 | 2.68504 | 0.008448 |
| 943399 | At5g47370 | HAT2      | homeobox-leucine zipper protein-like ; supported by cDNA:<br>gi_15450446_gb_AY052324.1_                                                                                               | 0.12414 | -0.42671 | 0.37436 | 2.67124 | 0.047893 |
| 963768 | At4g16770 | 245307_at | gibberellin oxidase-like protein non-consensus GG acceptor splice site<br>at exon 8; supported by cDNA:<br>gi_13265536_gb_AF324704.2_AF324704                                         | 0.07728 | -0.42224 | 0.37823 | 2.64386 | 1.32E-05 |
| 943327 | At5g48900 | 248681_at | pectate lyase non-consensus AG donor splice site at exon 2; supported<br>by full-length cDNA: Ceres: 21311.                                                                           | 0.04619 | -0.41236 | 0.38694 | 2.58438 | 4.78E-16 |
| 946167 | At3g58640 | 251526_at | putative protein several serine/threonine-specific protein kinases                                                                                                                    | 0.02437 | -0.39814 | 0.39982 | 2.50113 | 0        |
| 963761 | At4g16515 | 245336_at | Expressed protein ; supported by full-length cDNA: Ceres: 6580.                                                                                                                       | 0.05552 | -0.38705 | 0.41016 | 2.43809 | 2.11E-09 |

|        |           |           |                                                                                                                                              |         |          |         |         |          |
|--------|-----------|-----------|----------------------------------------------------------------------------------------------------------------------------------------------|---------|----------|---------|---------|----------|
| 948728 | At4g25260 | 254110_at | putative protein pectinesterase - Citrus sinensis, PID:g2098705                                                                              | 0.03984 | -0.3726  | 0.42403 | 2.3583  | 1.23E-17 |
| 942972 | At5g52900 | 248282_at | unknown protein ;supported by full-length cDNA: Ceres:148254.                                                                                | 0.06324 | -0.36708 | 0.42945 | 2.32854 | 2.23E-06 |
| 943130 | At5g51190 | 248448_at | putative protein contains similarity to ethylene responsive element binding factor;supported by full-length cDNA: Ceres:2347.                | 0.08874 | -0.36331 | 0.4332  | 2.30842 | 0.005431 |
| 948574 | At4g27280 | 253915_at | putative protein centrin, Marsilea vestita;supported by full-length cDNA: Ceres:13072.                                                       | 0.03668 | -0.36307 | 0.43344 | 2.3071  | 8.14E-20 |
| 946283 | At3g57795 | 251601_at | Expressed protein ; supported by full-length cDNA: Ceres: 19033.                                                                             | 0.04349 | -0.36284 | 0.43367 | 2.3059  | 7.17E-14 |
| 947153 | At3g45970 | ATEXLA1   | putative protein cim1 induced allergen, Glycine max, EMBL:U03860;supported by full-length cDNA: Ceres:27534.                                 | 0.05056 | -0.35777 | 0.43877 | 2.27911 | 1.02E-09 |
| 954133 | At1g29460 | 259787_at | auxin-induced protein, putative similar to SP:P33083 from [Glycine max];supported by full-length cDNA: Ceres:147801.                         | 0.09027 | -0.35594 | 0.44062 | 2.26954 | 0.00931  |
| 961679 | At2g45600 | 267503_at | unknown protein ; supported by full-length cDNA: Ceres:36855.                                                                                | 0.06492 | -0.34842 | 0.44831 | 2.23058 | 2.17E-05 |
| 964362 | At1g29440 | 257506_at | auxin-induced protein, putative similar to SP:P33083 from [Glycine max]                                                                      | 0.06708 | -0.34747 | 0.44929 | 2.22571 | 5.63E-05 |
| 942803 | At5g54490 | PBP1      | putative protein similar to unknown protein (pir T05752);supported by full-length cDNA: Ceres:109272.                                        | 0.08667 | -0.34378 | 0.45313 | 2.20688 | 0.008448 |
| 942241 | At5g60860 | AtRABA1f  | GTP-binding protein - like GTP-binding protein, garden pea, PIR:T06447                                                                       | 0.08209 | -0.34172 | 0.45528 | 2.19643 | 0.004224 |
| 955188 | At1g21910 | 260856_at | TINY-like protein similar to TINY GB:CAA64359 GI:1246403 from [Arabidopsis thaliana];supported by full-length cDNA: Ceres:19721.             | 0.08445 | -0.34051 | 0.45655 | 2.19032 | 0.007479 |
| 959156 | At1g03610 | 264836_at | unknown protein similar to hypothetical protein GB:AAD11584;supported by full-length cDNA: Ceres:123030.                                     | 0.05309 | -0.33213 | 0.46544 | 2.14849 | 1.96E-07 |
| 954130 | At1g29450 | 259784_at | auxin-induced protein, putative similar to SP:P33083 from [Glycine max];supported by full-length cDNA: Ceres:29931.                          | 0.08714 | -0.32902 | 0.46879 | 2.13316 | 0.016293 |
| 958603 | At1g09250 | 264264_at | unknown protein ESTs gb T04610, gb N38459, gb T45174, gb R30481 and gb N64971 come from this gene;supported by full-length cDNA: Ceres:9228. | 0.04342 | -0.32889 | 0.46893 | 2.13252 | 3.18E-11 |
| 955780 | At1g21050 | 261456_at | hypothetical protein predicted by genemark.hmm;supported by full-length cDNA: Ceres:3200.                                                    | 0.05752 | -0.32479 | 0.47338 | 2.11248 | 5.12E-06 |
| 960973 | At2g46310 | CRF5      | putative AP2 domain transcription factor                                                                                                     | 0.05675 | -0.32368 | 0.4746  | 2.10705 | 3.81E-06 |
| 954119 | At1g29500 | 259773_at | auxin-induced protein, putative similar to SP:P33083 from [Glycine max]                                                                      | 0.06061 | -0.32311 | 0.47522 | 2.10429 | 2.62E-05 |
| 948483 | At4g28240 | 253812_at | putative wound induced protein wound-induced protein - tomato (fragment), PIR2:S19773;supported by full-length cDNA: Ceres:20161.            | 0.03378 | -0.32122 | 0.47729 | 2.09517 | 2.90E-18 |
| 954868 | At1g68190 | 260431_at | putative zinc finger protein similar to zinc finger protein GB:BAA33206 from [Oryza sativa]                                                  | 0.08224 | -0.31761 | 0.48127 | 2.07782 | 0.012005 |
| 961547 | At2g39870 | 267339_at | unknown protein ; supported by cDNA: gi_13877742_gb_AF370134.1_AF370134                                                                      | 0.04657 | -0.31715 | 0.48178 | 2.07562 | 5.87E-09 |



|        |           |           |                                                                                                                                                                                                         |         |          |         |         |          |
|--------|-----------|-----------|---------------------------------------------------------------------------------------------------------------------------------------------------------------------------------------------------------|---------|----------|---------|---------|----------|
| 951211 | At3g30180 | BR6OX2    | cytochrome P450 homolog, putative similar to cytochrome P450 homolog GB:U54770 GI:1421740 from [ <i>Lycopersicon esculentum</i> ];supported by full-length cDNA: Ceres:11278.                           | 0.05398 | -0.31566 | 0.48344 | 2.06852 | 1.87E-06 |
| 945559 | At5g03230 | 250937_at | putative protein various predicted proteins, <i>Arabidopsis thaliana</i> ; supported by cDNA: gi_13878024_gb_AF370275.1_AF370275                                                                        | 0.07756 | -0.31082 | 0.48885 | 2.04561 | 0.007479 |
| 946241 | At3g58120 | BZIP61    | putative protein basic leucine zipper transcription activator shoot-forming PKSF1 - <i>Paulownia kawakamii</i> , EMBL:AF046934;supported by full-length cDNA: Ceres:34553.                              | 0.05373 | -0.30278 | 0.49799 | 2.00808 | 5.36E-06 |
| 958046 | At1g04240 | SHY2      | putative auxin-induced protein AUX2-11 Match to <i>Arabidopsis</i> IAA3 (gb U18406). EST gb T04296 comes from this gene; supported by cDNA: gi_972910_gb_U18406.1_ATU18406                              | 0.05866 | -0.30235 | 0.49848 | 2.00611 | 6.37E-05 |
| 955662 | At1g36940 | 261292_at | hypothetical protein predicted by genemark.hmm                                                                                                                                                          | 0.08412 | -0.30146 | 0.49951 | 2.00197 | 0.031784 |
| 948765 | At4g24570 | dic-02    | putative mitochondrial uncoupling protein mitochondrial uncoupling protein, <i>Arabidopsis thaliana</i> (thale cress), PATX:E1316826;supported by full-length cDNA: Ceres:119476.                       | 0.05329 | -0.30144 | 0.49952 | 2.00191 | 4.91E-06 |
| 961537 | At2g40000 | HSPRO2    | putative nematode-resistance protein ;supported by full-length cDNA: Ceres:35056.                                                                                                                       | 0.07204 | -0.29911 | 0.50221 | 1.99119 | 0.004224 |
| 963920 | At2g47440 | 245176_at | unknown protein similar to GP 2104534 AF001308 (T10M13.11)                                                                                                                                              | 0.04151 | -0.2956  | 0.50629 | 1.97516 | 7.63E-10 |
| 947626 | At4g38400 | ATEXLA2   | putative pollen allergen pollen allergen - <i>Pinus radiata</i> , PID:g2935527; supported by cDNA: gi_14190354_gb_AF378855.1_AF378855                                                                   | 0.06437 | -0.29474 | 0.50729 | 1.97125 | 8.26E-04 |
| 952525 | At3g24500 | MBF1C     | ethylene-responsive transcriptional coactivator, putative similar to GB:AAD46402 from [ <i>Lycopersicon esculentum</i> ] (Plant J. 18 (6), 589-600 (1999));supported by full-length cDNA: Ceres:158734. | 0.06992 | -0.29066 | 0.51208 | 1.95281 | 0.004224 |
| 953242 | At3g05640 | 258901_at | putative protein phosphatase-2C similar to protein phosphatase-2C GB:AAC36699 from [ <i>Mesembryanthemum crystallinum</i> ]; supported by cDNA: gi_15215718_gb_AY050388.1_                              | 0.07043 | -0.28683 | 0.51662 | 1.93567 | 0.006555 |
| 954129 | At1g29510 | SAUR68    | auxin-induced protein, putative similar to SP:P33083 from [ <i>Glycine max</i> ];supported by full-length cDNA: Ceres:9311.                                                                             | 0.07133 | -0.27027 | 0.5367  | 1.86323 | 0.015552 |
| 956024 | At1g18330 | EPR1      | hypothetical protein similar to hypothetical protein GB:AAF25987 GI:6714291 from [ <i>Arabidopsis thaliana</i> ]                                                                                        | 0.06876 | -0.26726 | 0.54043 | 1.85039 | 0.011127 |
| 945983 | At3g60390 | HAT3      | homeobox-leucine zipper protein HAT3 ; supported by cDNA: gi_527632_gb_U09338.1_ATU09338                                                                                                                | 0.06441 | -0.26658 | 0.54127 | 1.8475  | 0.004224 |
| 962572 | At5g15830 | AtbZIP3   | bZIP DNA-binding protein-like putative bZIP DNA-binding protein - <i>Capsicum chinense</i> , EMBL:AF127797                                                                                              | 0.07396 | -0.26362 | 0.54497 | 1.83495 | 0.032846 |
| 948053 | At4g32290 | 253475_at | putative protein predicted protein, <i>Arabidopsis thaliana</i> , PATCHX:G2252634                                                                                                                       | 0.05145 | -0.26019 | 0.5493  | 1.8205  | 9.74E-05 |
| 962317 | At4g36780 | 246284_at | putative protein                                                                                                                                                                                        | 0.05653 | -0.25485 | 0.5561  | 1.79824 | 1.11E-03 |

|        |           |           |                                                                                                                                                                   |         |          |         |         |          |
|--------|-----------|-----------|-------------------------------------------------------------------------------------------------------------------------------------------------------------------|---------|----------|---------|---------|----------|
| 951962 | At3g16800 | 257650_at | protein phosphatase, putative similar to protein phosphatase-2C GB:AAC36699 from [Mesembryanthemum crystallinum];supported by full-length cDNA: Ceres:6305.       | 0.06536 | -0.25216 | 0.55955 | 1.78714 | 0.012005 |
| 957387 | At1g54200 | 263002_at | hypothetical protein predicted by genemark.hmm                                                                                                                    | 0.05375 | -0.25044 | 0.56177 | 1.78009 | 5.88E-04 |
| 956885 | At1g21820 | 262488_at | unknown protein EST gb AA586241 comes from this gene                                                                                                              | 0.0401  | -0.24876 | 0.56395 | 1.77321 | 2.64E-07 |
| 942245 | At5g60850 | OBP4      | zinc finger protein OBP4 - like zinc finger protein OBP4, Arabidopsis thaliana, EMBL:AF155817;supported by full-length cDNA: Ceres:19080.                         | 0.05049 | -0.24826 | 0.5646  | 1.77116 | 1.89E-04 |
| 946660 | At3g53180 | 251973_at | nodulin / glutamate-ammonia ligase - like protein MtN6 - nodulin 6, Medicago truncatula, EMBL:MET133118                                                           | 0.04078 | -0.24453 | 0.56947 | 1.75603 | 8.16E-07 |
| 951685 | At3g19680 | 257076_at | unknown protein                                                                                                                                                   | 0.04173 | -0.2433  | 0.57109 | 1.75104 | 2.00E-06 |
| 952586 | At3g15760 | 258275_at | unknown protein ;supported by full-length cDNA: Ceres:8259.                                                                                                       | 0.04158 | -0.24152 | 0.57343 | 1.74388 | 2.20E-06 |
| 955579 | At1g32920 | 261193_at | unknown protein ; supported by cDNA: gi_15450636_gb_AY052686.1_                                                                                                   | 0.05088 | -0.24132 | 0.57369 | 1.7431  | 4.11E-04 |
| 952545 | At3g13980 | 258196_at | hypothetical protein predicted by genemark.hmm                                                                                                                    | 0.05391 | -0.23956 | 0.57602 | 1.73605 | 1.44E-03 |
| 955287 | At1g02660 | 260915_at | hypothetical protein similar to hypothetical protein GB:CAB83109 G1:7362739 from [Arabidopsis thaliana]; supported by cDNA: gi_15081706_gb_AY048246.1_            | 0.0691  | -0.23698 | 0.57945 | 1.72578 | 0.04836  |
| 952654 | At3g15770 | 258262_at | hypothetical protein                                                                                                                                              | 0.05011 | -0.23583 | 0.581   | 1.72118 | 4.79E-04 |
| 954598 | At1g68550 | CPuORF53  | putative AP2 domain transcription factor contains Pfam profile: PF00847 AP2 domain; supported by cDNA: gi_16604674_gb_AY059782.1_                                 | 0.03712 | -0.23367 | 0.58389 | 1.71264 | 1.64E-07 |
| 949688 | At4g08950 | EXO       | putative phi-1-like phosphate-induced protein ;supported by full-length cDNA: Ceres:3552.                                                                         | 0.04854 | -0.23314 | 0.5846  | 1.71056 | 3.18E-04 |
| 954610 | At1g74670 | 260221_at | GAST1-like protein similar to GAST1 protein precursor GB:P27057 [Lycopersicon esculentum] (induced by gibberellins, inhibited by ABA Plant J 1992 Mar;2(2):153-9) | 0.04671 | -0.23056 | 0.58808 | 1.70045 | 1.75E-04 |
| 950668 | At1g07135 | 256046_at | unknown protein                                                                                                                                                   | 0.06275 | -0.22982 | 0.58909 | 1.69752 | 0.02396  |
| 953627 | At3g11490 | 259287_at | putative rac GTPase activating protein similar to rac GTPase activating protein 1 GB:AAC62624 [Lotus japonicus]                                                   | 0.04526 | -0.22861 | 0.59074 | 1.6928  | 9.89E-05 |
| 946880 | At3g50340 | 252204_at | putative protein predicted protein, Arabidopsis thaliana                                                                                                          | 0.04543 | -0.22678 | 0.59323 | 1.68569 | 1.33E-04 |
| 945272 | At5g06930 | 250653_at | putative protein strong similarity to unknown protein (gb AAD23715.1)                                                                                             | 0.04324 | -0.22612 | 0.59413 | 1.68312 | 4.36E-05 |
| 952781 | At3g15450 | 258402_at | unknown protein very similar to unknown protein GB:AAC39468 from [Arabidopsis thaliana]; supported by cDNA: gi_14335087_gb_AY037223.1_                            | 0.06419 | -0.2239  | 0.59717 | 1.67456 | 0.04155  |
| 957228 | At1g14920 | GAI       | signal response protein (GAI) identical to GAI GB:CAA75492 G1:2569938 [Arabidopsis thaliana] (Genes Dev. In press); supported by cDNA: gi_16648833_gb_AY058194.1_ | 0.02743 | -0.22204 | 0.59973 | 1.66741 | 5.44E-13 |

|        |           |             |                                                                                                                                                                                     |         |          |         |         |          |
|--------|-----------|-------------|-------------------------------------------------------------------------------------------------------------------------------------------------------------------------------------|---------|----------|---------|---------|----------|
| 958670 | At1g78700 | 264248_at   | hypothetical protein predicted by genscan+; supported by cDNA: gi_15215801_gb_AY050430.1_                                                                                           | 0.05914 | -0.22186 | 0.59999 | 1.6667  | 0.018087 |
| 954493 | At1g66400 | 260135_at   | calmodulin-related protein similar to GB:P25070 from [Arabidopsis thaliana], contains Pfam profile: PF00036 EF hand (4 copies);supported by full-length cDNA: Ceres:95959.          | 0.06104 | -0.22169 | 0.60023 | 1.66604 | 0.026501 |
| 952279 | At3g17100 | 257894_at   | unknown protein ; supported by cDNA: gi_15010765_gb_AY045684.1_                                                                                                                     | 0.05358 | -0.22015 | 0.60236 | 1.66014 | 0.005431 |
| 943481 | At5g47380 | 248784_at   | putative protein similar to unknown protein (pir  T02421)                                                                                                                           | 0.05313 | -0.21758 | 0.60592 | 1.65038 | 0.005431 |
| 958782 | At1g11960 | 264389_at   | unknown protein similar to hypothetical protein HYP1 gb Z97338 from A. thaliana                                                                                                     | 0.04697 | -0.21736 | 0.60624 | 1.64952 | 6.72E-04 |
| 954136 | At1g29430 | 259790_s_at | auxin-induced protein, putative similar to SP:P33083 from [Glycine max];supported by full-length cDNA: Ceres:4119.                                                                  | 0.06228 | -0.2169  | 0.60687 | 1.64779 | 0.04193  |
| 954001 | At1g69010 | BIM2        | putative DNA-binding protein predicted by genscan, multiple est matches; Pfam HMM hit: helix-loop-helix DNA-binding domain;supported by full-length cDNA: Ceres:27793.              | 0.05332 | -0.21443 | 0.61033 | 1.63845 | 0.007479 |
| 947483 | At4g39800 | MIPS1       | myo-inositol-1-phosphate synthase ;supported by full-length cDNA: Ceres:1978.                                                                                                       | 0.03888 | -0.21391 | 0.61107 | 1.63648 | 1.09E-05 |
| 956638 | At1g70940 | PIN3        | auxin transport protein REH1, putative similar to auxin transport protein REH1 GI:3377509 from [Oryza sativa]; supported by cDNA: gi_5817300_gb_AF087818.1_AF087818                 | 0.05056 | -0.21298 | 0.61237 | 1.63299 | 0.004224 |
| 953484 | At3g02140 | TMAC2       | hypothetical protein predicted by genscan; supported by cDNA: gi_14334515_gb_AY034949.1_                                                                                            | 0.05788 | -0.2119  | 0.6139  | 1.62893 | 0.02396  |
| 942391 | At5g58650 | PSY1        | putative protein ; supported by cDNA: gi_15529263_gb_AY052256.1_                                                                                                                    | 0.0531  | -0.21178 | 0.61408 | 1.62845 | 0.008448 |
| 946828 | At3g50660 | DWF4        | steroid 22-alpha-hydroxylase (DWF4) ; supported by cDNA: gi_15724347_gb_AF412114.1_AF412114                                                                                         | 0.06033 | -0.21027 | 0.61621 | 1.62282 | 0.04155  |
| 955401 | At1g01260 | 261050_at   | transcription factor MYC7E, putative similar to transcription factor MYC7E GB:AAD15818 GI:4321762 from [Zea mays]                                                                   | 0.05387 | -0.21003 | 0.61655 | 1.62193 | 0.011127 |
| 946462 | At3g54810 | BME3        | putative protein GATA transcription factor 3, Arabidopsis thaliana, Y13650; supported by cDNA: gi_15724333_gb_AF412107.1_AF412107                                                   | 0.03643 | -0.20245 | 0.6274  | 1.59387 | 7.98E-06 |
| 942229 | At5g60680 | 247585_at   | putative protein predicted proteins, Arabidopsis thaliana;supported by full-length cDNA: Ceres:16638.                                                                               | 0.02781 | -0.19959 | 0.63156 | 1.58339 | 5.29E-10 |
| 942603 | At5g56980 | 247933_at   | putative protein non-consensus CG donor splice site at exon 1, GA donor splice site at exon 3, similar to unknown protein (pir  T04268);supported by full-length cDNA: Ceres:32257. | 0.03849 | -0.1982  | 0.63358 | 1.57834 | 6.50E-05 |
| 944984 | At5g11970 | 250301_at   | putative protein predicted proteins, Arabidopsis thaliana; supported by full-length cDNA: Ceres: 13625.                                                                             | 0.03599 | -0.19762 | 0.63442 | 1.57624 | 1.14E-05 |
| 948997 | At4g22190 | 254356_at   | hypothetical protein ;supported by full-length cDNA: Ceres:6848.                                                                                                                    | 0.04448 | -0.19728 | 0.63491 | 1.57502 | 1.49E-03 |

|        |           |           |                                                                                                                                                                      |         |          |         |         |          |
|--------|-----------|-----------|----------------------------------------------------------------------------------------------------------------------------------------------------------------------|---------|----------|---------|---------|----------|
| 946165 | At3g58620 | TTL4      | putative protein At2g42580 - Arabidopsis thaliana, EMBL:AC007087                                                                                                     | 0.03403 | -0.19681 | 0.63561 | 1.57329 | 2.50E-06 |
| 949514 | At4g11280 | ACS6      | ACC synthase (AtACS-6) ; supported by cDNA: gi_16226285_gb_AF428292.1_AF428292                                                                                       | 0.05015 | -0.19599 | 0.63681 | 1.57034 | 0.010113 |
| 947827 | At4g34760 | 253255_at | putative auxin-regulated protein auxin-induced protein X15, Glycine max, PIR2:JQ1097;supported by full-length cDNA: Ceres:10510.                                     | 0.05159 | -0.19355 | 0.6404  | 1.56153 | 0.018087 |
| 956582 | At1g68560 | XYL1      | alpha-xylosidase precursor identical to alpha-xylosidase precursor GB:AAD05539 GI:4163997 from [Arabidopsis thaliana]; supported by cDNA: gi_15982750_gb_AY057482.1_ | 0.02615 | -0.19313 | 0.64101 | 1.56003 | 1.25E-10 |
| 945912 | At3g61830 | ARF18     | auxin response factor-like protein auxin response factor 9 - Arabidopsis thaliana, PIR:T08917; supported by cDNA: gi_16604602_gb_AY059746.1_                         | 0.05482 | -0.19205 | 0.64261 | 1.55615 | 0.039896 |
| 955859 | At1g21060 | 261451_at | unknown protein                                                                                                                                                      | 0.05251 | -0.18749 | 0.64939 | 1.5399  | 0.032846 |
| 960949 | At2g14900 | 266613_at | similar to gibberellin-regulated proteins                                                                                                                            | 0.04667 | -0.18738 | 0.64956 | 1.53949 | 0.007479 |
| 948567 | At4g27260 | WES1      | GH3 like protein GH3 protein, Glycine max., PIR2:S17433                                                                                                              | 0.03459 | -0.18621 | 0.65132 | 1.53535 | 2.00E-05 |
| 948150 | At4g31390 | 253517_at | predicted protein hypothetical protein slr1919, Synechocystis sp., PIR2:S75233                                                                                       | 0.03991 | -0.18371 | 0.65508 | 1.52653 | 7.41E-04 |
| 954685 | At1g80280 | 260297_at | unknown protein contains Pfam profile: PF00561 alpha/beta hydrolase fold                                                                                             | 0.02881 | -0.1807  | 0.65964 | 1.51599 | 1.82E-07 |
| 953480 | At3g02170 | LNG2      | unknown protein ;supported by full-length cDNA: Ceres:22225.                                                                                                         | 0.0287  | -0.18007 | 0.66059 | 1.5138  | 1.82E-07 |
| 955218 | At1g06850 | AtbZIP52  | b-Zip DNA binding protein, putative similar to b-Zip DNA binding protein GB:CAB06697 GI:2246376 from [Arabidopsis thaliana]                                          | 0.04299 | -0.17873 | 0.66263 | 1.50915 | 0.004224 |
| 953667 | At3g05120 | GID1A     | unknown protein                                                                                                                                                      | 0.03654 | -0.17771 | 0.66419 | 1.50559 | 2.41E-04 |
| 961901 | At5g28300 | 245861_at | GTL1 - like protein GTL1, Arabidopsis thaliana, EMBL:ATAJ3215; supported by cDNA: gi_14423451_gb_AF386963.1_AF386963                                                 | 0.05079 | -0.17694 | 0.66536 | 1.50295 | 0.04155  |

### Shade-regulated in sav1 seedlings.

Down-regulated genes identified in response to 1h of W+FR in sav1 mutant seedlings. "Down-regulated" indicates genes that have significantly (BH<0.05) lower signal (Fold change < 1.5) after 1h of W+FR compared to their levels at time 0 (before starting the simulated shade treatment).

| Sequence ID | Accession # | Sequence Name(s) | Sequence Description                                                                                                        | Log (Error) | Log (Ratio) | Ratio   | Fold Change | BH       |
|-------------|-------------|------------------|-----------------------------------------------------------------------------------------------------------------------------|-------------|-------------|---------|-------------|----------|
| 961502      | At2g30070   | ATKT1            | high affinity K+ transporter (AtKUP1/AtKT1p) identical to GB:AF029876; supported by cDNA: gi_2654087_gb_AF033118.1_AF033118 | 0.04334     | 0.17748     | 1.50482 | -1.50482    | 0.002549 |
| 942203      | At5g61420   | MYB28            | putative transcription factor MYB28 ; supported by cDNA: gi_5823328_gb_AF175998.1_AF175998                                  | 0.04209     | 0.17765     | 1.50539 | -1.50539    | 0.001358 |
| 959591      | At2g36630   | 265203_at        | unknown protein                                                                                                             | 0.05103     | 0.1787      | 1.50902 | -1.50902    | 0.021905 |

|        |           |           |                                                                                                                                                                                                                                                          |         |         |         |          |          |
|--------|-----------|-----------|----------------------------------------------------------------------------------------------------------------------------------------------------------------------------------------------------------------------------------------------------------|---------|---------|---------|----------|----------|
| 953084 | At3g05800 | 258742_at | hypothetical protein predicted by genscan+;supported by full-length cDNA: Ceres:21672.                                                                                                                                                                   | 0.0499  | 0.17909 | 1.51039 | -1.51039 | 0.016617 |
| 955473 | At1g19700 | BEL10     | homeodomain protein, putative similar to homeodomain protein GI:7239157 from ( <i>Malus domestica</i> )                                                                                                                                                  | 0.03679 | 0.17973 | 1.51261 | -1.51261 | 9.72E-05 |
| 961969 | At5g11060 | KNAT4     | HOMEODOMAIN PROTEIN KNOTTED-1 LIKE 4 (KNAT4)                                                                                                                                                                                                             | 0.04187 | 0.18099 | 1.51701 | -1.51701 | 0.001358 |
| 962303 | At4g36500 | 246270_at | putative protein                                                                                                                                                                                                                                         | 0.02825 | 0.18715 | 1.53867 | -1.53867 | 6.25E-09 |
| 945321 | At5g06270 | 250734_at | putative protein similar to unknown protein (gb AAF02129.1);supported by full-length cDNA: Ceres:104017.                                                                                                                                                 | 0.02748 | 0.1925  | 1.55776 | -1.55776 | 4.85E-10 |
| 954557 | At1g70700 | TIFY7     | hypothetical protein predicted by genefinder                                                                                                                                                                                                             | 0.04445 | 0.19635 | 1.57162 | -1.57162 | 7.11E-04 |
| 958466 | At2g28550 | RAP2.7    | putative AP2 domain transcription factor pFAM domain (PF00847); supported by cDNA: gi_15292762_gb_AY050815.1_                                                                                                                                            | 0.03481 | 0.19721 | 1.57474 | -1.57474 | 1.91E-06 |
| 941833 | At5g64770 | 247252_at | unknown protein                                                                                                                                                                                                                                          | 0.04782 | 0.19879 | 1.5805  | -1.5805  | 0.00195  |
| 956329 | At1g22550 | 261924_at | peptide transporter, putative similar to peptide transporter GI:9757725 from [ <i>Arabidopsis thaliana</i> ]                                                                                                                                             | 0.03111 | 0.19971 | 1.58385 | -1.58385 | 2.22E-08 |
| 948764 | At4g24780 | 254119_at | putative pectate lyase pectate lyase, <i>Musa acuminata</i> , PATX:E209876;supported by full-length cDNA: Ceres:36681.                                                                                                                                   | 0.04164 | 0.2     | 1.58489 | -1.58489 | 1.40E-04 |
| 944216 | At5g38220 | 249551_at | putative protein predicted proteins, <i>Arabidopsis thaliana</i>                                                                                                                                                                                         | 0.03912 | 0.201   | 1.58855 | -1.58855 | 2.81E-05 |
| 960783 | At2g22770 | NAI1      | putative bHLH transcription factor                                                                                                                                                                                                                       | 0.03672 | 0.20136 | 1.58986 | -1.58986 | 5.02E-06 |
| 961409 | At2g37710 | RLK       | putative receptor-like protein kinase same as GB:X95909 (polymorphism exists at a GA repeat. We found 6 copies in our sequence whereas only 5 copies exist in GB:X95909)                                                                                 | 0.03961 | 0.20768 | 1.61318 | -1.61318 | 1.72E-05 |
| 957125 | At1g13100 | CYP71B29  | putative cytochrome P450 monooxygenase strong similarity to gb X97864 cytochrome P450 from <i>Arabidopsis thaliana</i> and is a member of the PF 00067 Cytochrome P450 family                                                                            | 0.04672 | 0.2108  | 1.62481 | -1.62481 | 5.08E-04 |
| 955903 | At1g01140 | CIPK9     | serine/threonine kinase, putative similar to serine/threonine kinase GB:CAA73067.1 GI:2632252 from [ <i>Sorghum bicolor</i> ]; supported by cDNA: gi_14423523_gb_AF386999.1_AF386999                                                                     | 0.0416  | 0.2121  | 1.62969 | -1.62969 | 3.45E-05 |
| 947936 | At4g33960 | 253317_at | putative protein                                                                                                                                                                                                                                         | 0.04893 | 0.21312 | 1.63351 | -1.63351 | 0.000711 |
| 959971 | At2g20180 | PIL5      | unknown protein                                                                                                                                                                                                                                          | 0.05866 | 0.21372 | 1.63577 | -1.63577 | 0.013965 |
| 947271 | At3g45210 | 252619_at | putative protein several hypothetical proteins - <i>Arabidopsis thaliana</i> ; supported by cDNA: gi_15724293_gb_AF412087.1_AF412087                                                                                                                     | 0.0369  | 0.2146  | 1.63909 | -1.63909 | 8.22E-07 |
| 944788 | At5g15310 | ATMYB16   | myb-related protein - like myb-related protein 1, garden petunia, PIR:S26605                                                                                                                                                                             | 0.06469 | 0.21497 | 1.64047 | -1.64047 | 0.038965 |
| 957126 | At1g13110 | CYP71B7   | putative cytochrome P450 monooxygenase identical to gb X97864 cytochrome P450 from <i>Arabidopsis thaliana</i> and is a member of the PF 00067 Cytochrome P450 family. ESTs gb T44875, gb T04814, gb R65111, gb T44310 and gb T04541 come from this gene | 0.02902 | 0.21577 | 1.64349 | -1.64349 | 2.28E-11 |

|        |           |           |                                                                                                                                                                                                      |         |         |         |          |          |
|--------|-----------|-----------|------------------------------------------------------------------------------------------------------------------------------------------------------------------------------------------------------|---------|---------|---------|----------|----------|
| 957099 | At1g28600 | 262745_at | lipase, putative contains Pfam profile: PF00657 Lipase/Acylhydrolase with GDSL-like motif;supported by full-length cDNA: Ceres:37307.                                                                | 0.0577  | 0.21856 | 1.65409 | -1.65409 | 0.008305 |
| 955114 | At1g49230 | 260753_at | RING-H2 finger protein RHA3a, putative similar to RING-H2 finger protein RHA3a GI:3790573 from [Arabidopsis thaliana]                                                                                | 0.04937 | 0.21879 | 1.65497 | -1.65497 | 7.11E-04 |
| 946812 | At3g50440 | MES10     | putative protein pir7a protein - Oryza sativa, PIR:s47086;supported by full-length cDNA: Ceres:30104.                                                                                                | 0.04742 | 0.22082 | 1.66273 | -1.66273 | 2.73E-04 |
| 952756 | At3g16560 | 258437_at | unknown protein contains protein phosphatase 2C domain; supported by full-length cDNA: Ceres: 249756.                                                                                                | 0.03483 | 0.22116 | 1.66403 | -1.66403 | 3.40E-08 |
| 949499 | At4g12310 | CYP706A5  | flavonoid 3,5-hydroxylase -like protein flavonoid 3',5'-hydroxylase - Campanula medium, PID:d1003951                                                                                                 | 0.0495  | 0.2225  | 1.66918 | -1.66918 | 5.49E-04 |
| 955742 | At1g18810 | 261407_at | unknown protein ;supported by full-length cDNA: Ceres:151637.                                                                                                                                        | 0.05678 | 0.22316 | 1.67172 | -1.67172 | 0.004655 |
| 948032 | At4g33040 | 253382_at | putative protein AT.I.24, Arabidopsis thaliana, gb:U63815;supported by full-length cDNA: Ceres:4868.                                                                                                 | 0.0607  | 0.2233  | 1.67225 | -1.67225 | 0.012258 |
| 947096 | At3g47420 | 252414_at | putative protein sn-glycerol-3-phosphate permease - Haemophilus influenzae,PID:g3603157; supported by cDNA: gi_13430515_gb_AF360170.1_AF360170                                                       | 0.04    | 0.2246  | 1.67725 | -1.67725 | 2.47E-06 |
| 958564 | At1g54820 | 264240_at | protein kinase, putative Simisimilar to protein kinase 2 GI:7573598 from [Populus nigra]                                                                                                             | 0.03194 | 0.22526 | 1.67981 | -1.67981 | 3.47E-10 |
| 955636 | At1g20190 | ATEXPA11  | expansin S2 precursor, putative similar to GB:U30460 from [Cucumis sativus];supported by full-length cDNA: Ceres:11011.                                                                              | 0.05851 | 0.22659 | 1.68498 | -1.68498 | 0.006273 |
| 963765 | At4g15630 | 245304_at | hypothetical protein ; supported by full-length cDNA: Ceres: 933.                                                                                                                                    | 0.02842 | 0.22667 | 1.68528 | -1.68528 | 3.98E-13 |
| 948984 | At4g21990 | APR3      | PRH26 protein ;supported by full-length cDNA: Ceres:36866.                                                                                                                                           | 0.04851 | 0.22701 | 1.68658 | -1.68658 | 2.48E-04 |
| 954461 | At1g78170 | 260081_at | unknown protein                                                                                                                                                                                      | 0.03006 | 0.22743 | 1.68823 | -1.68823 | 8.98E-12 |
| 960258 | At2g19650 | 265939_at | putative Ta11-like non-LTR retroelement protein similar to GB:AAA75253; some members of this protein family have a weak CCHC zinc fingers that is mostly from retroviral gag proteins (nucleocapsid) | 0.04838 | 0.22772 | 1.68936 | -1.68936 | 2.19E-04 |
| 949219 | At4g19380 | 254572_at | putative protein predicted protein MTCY20G9, Mycobacterium tuberculosis                                                                                                                              | 0.05064 | 0.22932 | 1.69557 | -1.69557 | 4.75E-04 |
| 945703 | At5g01820 | ATSR1     | putative protein serine/threonine protein kinase ATPK10 - Arabidopsis thaliana, EMBL:D30622; supported by cDNA: gi_13249126_gb_AF295669.1_AF295669                                                   | 0.05876 | 0.23105 | 1.70235 | -1.70235 | 0.004655 |
| 957263 | At1g64710 | ADH       | alcohol dehydrogenase, putative similar to alcohol dehydrogenase GI:551256 from [Nicotiana tabacum]                                                                                                  | 0.06705 | 0.23374 | 1.71291 | -1.71291 | 0.023141 |
| 961180 | At2g44940 | 266820_at | putative AP2 domain transcription factor pFAM domain (PF00847)supported by full-length cDNA: Ceres:31044.                                                                                            | 0.04501 | 0.23542 | 1.71959 | -1.71959 | 1.82E-05 |
| 956953 | At1g15260 | 262598_at | unknown protein EST gb N65467 comes from this gene;supported by full-length cDNA: Ceres:30239.                                                                                                       | 0.0197  | 0.2358  | 1.72107 | -1.72107 | 4.18E-30 |

| 957334                                                                                                                                                                                                                                                                                                 | At1g75710   | 262969_at        | unknown protein                                                                                                                                       | 0.04499     | 0.23594     | 1.72163 | -1.72163    | 1.72E-05 |
|--------------------------------------------------------------------------------------------------------------------------------------------------------------------------------------------------------------------------------------------------------------------------------------------------------|-------------|------------------|-------------------------------------------------------------------------------------------------------------------------------------------------------|-------------|-------------|---------|-------------|----------|
| 947250                                                                                                                                                                                                                                                                                                 | At3g44970   | 252629_at        | cytochrome P450 - like protein cytochrome P450 d13695c, Arabidopsis thaliana, PIR:C71417                                                              | 0.06694     | 0.2378      | 1.729   | -1.729      | 0.018802 |
| 941671                                                                                                                                                                                                                                                                                                 | At5g67280   | RLK              | receptor-like protein kinase ;supported by full-length cDNA: Ceres:110712.                                                                            | 0.04106     | 0.23948     | 1.73574 | -1.73574    | 7.50E-07 |
| 963129                                                                                                                                                                                                                                                                                                 | At2g39250   | SNZ              | putative AP2 domain transcription factor pFAM domain (PF00847)                                                                                        | 0.06232     | 0.24099     | 1.74175 | -1.74175    | 0.006273 |
| 942715                                                                                                                                                                                                                                                                                                 | At5g55620   | 248028_at        | putative protein similar to unknown protein (gb AAF04428.1);supported by full-length cDNA: Ceres:27668.                                               | 0.06711     | 0.24157     | 1.74409 | -1.74409    | 0.01622  |
| 959806                                                                                                                                                                                                                                                                                                 | At2g20950   | 265433_at        | unknown protein                                                                                                                                       | 0.05615     | 0.2478      | 1.76931 | -1.76931    | 0.000711 |
| 953273                                                                                                                                                                                                                                                                                                 | At3g10525   | 258919_at        | Expressed protein ; supported by full-length cDNA: Ceres: 2153.                                                                                       | 0.05663     | 0.24863     | 1.7727  | -1.7727     | 0.000711 |
| 960729                                                                                                                                                                                                                                                                                                 | At2g38750   | ANNAT4           | putative annexin ;supported by full-length cDNA: Ceres:32721.                                                                                         | 0.05566     | 0.25841     | 1.81306 | -1.81306    | 2.88E-04 |
| 944325                                                                                                                                                                                                                                                                                                 | At5g24570   | 249750_at        | unknown protein ;supported by full-length cDNA: Ceres:141953.                                                                                         | 0.06965     | 0.26554     | 1.84307 | -1.84307    | 0.007789 |
| 944663                                                                                                                                                                                                                                                                                                 | At5g17700   | 250045_at        | putative protein mRNA (orf04), Arabidopsis thaliana, EMBL:ATORF04                                                                                     | 0.08115     | 0.27291     | 1.8746  | -1.8746     | 0.034371 |
| 947259                                                                                                                                                                                                                                                                                                 | At3g44990   | XTR8             | xyloglucan endo-transglycosylase ; supported by cDNA: gi_15810248_gb_AY056163.1_                                                                      | 0.07652     | 0.27773     | 1.89555 | -1.89555    | 0.014352 |
| 954728                                                                                                                                                                                                                                                                                                 | At1g70560   | TAA1             | putative alliinase similar to alliinase precursor GB:AAD26853 [Allium cepa]                                                                           | 0.05605     | 0.31308     | 2.05627 | -2.05627    | 2.87E-06 |
| 956567                                                                                                                                                                                                                                                                                                 | At1g74940   | 262170_at        | hypothetical protein predicted by genemark.hmm;supported by full-length cDNA: Ceres:24864.                                                            | 0.03482     | 0.32434     | 2.11029 | -2.11029    | 4.84E-18 |
| 960280                                                                                                                                                                                                                                                                                                 | At2g15050   | LTP              | putative lipid transfer protein                                                                                                                       | 0.01596     | 0.32879     | 2.13204 | -2.13204    | 0        |
| 950807                                                                                                                                                                                                                                                                                                 | At1g51700   | ADOF1            | dof zinc finger protein identical to dof zinc finger protein [Arabidopsis thaliana] GI:3608261; supported by cDNA: gi_3608260_dbj_AB017564.1_AB017564 | 0.06588     | 0.33229     | 2.14925 | -2.14925    | 4.51E-05 |
| 959272                                                                                                                                                                                                                                                                                                 | At2g17300   | 264909_at        | unknown protein                                                                                                                                       | 0.09132     | 0.33868     | 2.18115 | -2.18115    | 0.011271 |
| 943916                                                                                                                                                                                                                                                                                                 | At5g41410   | BEL1             | homeotic protein BEL1 homolog ; supported by cDNA: gi_15146192_gb_AY049237.1_                                                                         | 0.06231     | 0.35067     | 2.24218 | -2.24218    | 2.33E-06 |
| 950790                                                                                                                                                                                                                                                                                                 | At1g51805   | 256168_at        | receptor protein kinase, putative contains Pfam profiles: PF00069: Eukaryotic protein kinase domain, multiple PF00560: Leucine Rich Repeat            | 0.03805     | 0.35914     | 2.28635 | -2.28635    | 1.61E-18 |
| 947308                                                                                                                                                                                                                                                                                                 | At3g44450   | 252661_at        | putative protein                                                                                                                                      | 0.0864      | 0.48008     | 3.02048 | -3.02048    | 3.37E-06 |
| 941718                                                                                                                                                                                                                                                                                                 | At5g66740   | 247055_at        | putative protein similar to unknown protein (emb CAB81597.1)                                                                                          | 0.13948     | 0.48629     | 3.06404 | -3.06404    | 0.023141 |
| <b>Up-regulated genes identified in response to 1h of W+FR in sav1 mutant seedlings. "Up-regulated" indicates genes that have significantly (BH&lt;0.05) higher signal (Fold change &gt; 1.5) after 1h of W+FR compared to their levels at time 0 (before starting the simulated shade treatment).</b> |             |                  |                                                                                                                                                       |             |             |         |             |          |
| Sequence ID                                                                                                                                                                                                                                                                                            | Accession # | Sequence Name(s) | Sequence Description                                                                                                                                  | Log (Error) | Log (Ratio) | Ratio   | Fold Change | BH       |

|        |           |             |                                                                                                                                                                                           |         |          |         |          |          |
|--------|-----------|-------------|-------------------------------------------------------------------------------------------------------------------------------------------------------------------------------------------|---------|----------|---------|----------|----------|
| 947650 | At4g37770 | ACS8        | 1-aminocyclopropane-1-carboxylate synthase - like protein 1-aminocyclopropane-1-carboxylate synthase, Arabidopsis thaliana, S71174; supported by cDNA: gi_12247996_gb_AF334712.1_AF334712 | 0.2316  | -1.75386 | 0.01763 | 56.73592 | 8.58E-12 |
| 958701 | At1g04180 | 264323_at   | putative dimethylaniline monooxygenase                                                                                                                                                    | 0.09903 | -1.31711 | 0.04818 | 20.75463 | 2.66E-37 |
| 948061 | At4g32280 | IAA29       | Expressed protein ; supported by cDNA: gi_14190492_gb_AF380646.1_AF380646                                                                                                                 | 0.0593  | -1.31205 | 0.04875 | 20.51417 | 0        |
| 963796 | At4g16780 | ATHB2       | DNA-binding homeotic protein Athb-2 ; supported by cDNA: gi_166751_gb_M90394.1_ATHHOMEOA                                                                                                  | 0.0937  | -1.22452 | 0.05963 | 16.76968 | 5.39E-36 |
| 958331 | At2g42870 | PAR1        | unknown protein ;supported by full-length cDNA: Ceres:102453.                                                                                                                             | 0.12241 | -1.15001 | 0.07079 | 14.12583 | 2.34E-18 |
| 948437 | At4g28720 | 253794_at   | putative protein dimethylaniline monooxygenase (N-oxide-forming), Sus scrofa domestica, PIR1:A33768                                                                                       | 0.08012 | -1.14523 | 0.07158 | 13.97101 | 0        |
| 952778 | At3g15540 | IAA19       | early auxin-induced protein, IAA19 identical to IAA19 GB:AAB84356 from [Arabidopsis thaliana]; supported by full-length cDNA: Ceres:94231.                                                | 0.04968 | -1.12475 | 0.07503 | 13.32754 | 0        |
| 954520 | At1g52830 | IAA6        | putative IAA6 protein similar to IAA6 protein GB:S5849 from [Arabidopsis thaliana];supported by full-length cDNA: Ceres:147711.                                                           | 0.08839 | -1.05175 | 0.08877 | 11.26547 | 9.78E-30 |
| 943073 | At5g51810 | GA20OX2     | gibberellin 20-oxidase (emb)CAA58294.1)                                                                                                                                                   | 0.1129  | -1.00195 | 0.09955 | 10.04501 | 2.46E-16 |
| 956171 | At1g15580 | IAA5        | auxin-induced protein IAA5, putative similar to auxin-induced protein IAA5 GI:972913 from [Arabidopsis thaliana]                                                                          | 0.08139 | -0.99951 | 0.10011 | 9.98862  | 1.02E-31 |
| 953791 | At1g02340 | HFR1        | unknown protein contains similarity to phytochrome interacting factor 3 GI:3929586 from [Arabidopsis thaliana]; supported by cDNA: gi_11870114_gb_AF324245.1_AF324245                     | 0.09663 | -0.9834  | 0.1039  | 9.62509  | 1.36E-21 |
| 949810 | At4g08040 | ACS11       | strong similarity to 1-aminocyclopropane-1-carboxylic acid synthases                                                                                                                      | 0.13079 | -0.96742 | 0.10779 | 9.2772   | 3.04E-11 |
| 945801 | At3g63440 | CKX6        | cytokinin oxidase -like protein cytokinin oxidase, Zea mays, EMBL:ZMY18377                                                                                                                | 0.10035 | -0.95484 | 0.11096 | 9.01231  | 7.79E-19 |
| 942972 | At5g52900 | 248282_at   | unknown protein ;supported by full-length cDNA: Ceres:148254.                                                                                                                             | 0.03576 | -0.93807 | 0.11533 | 8.67107  | 0        |
| 944690 | At5g18060 | 250012_x_at | auxin-induced protein-like                                                                                                                                                                | 0.05629 | -0.91982 | 0.12028 | 8.31416  | 0        |
| 942112 | At5g62280 | 247474_at   | putative protein predicted proteins, Arabidopsis thaliana                                                                                                                                 | 0.04663 | -0.90911 | 0.12328 | 8.11174  | 0        |
| 943709 | At5g43890 | YUC5        | dimethylaniline monooxygenase-like                                                                                                                                                        | 0.1321  | -0.9016  | 0.12543 | 7.97251  | 1.67E-09 |
| 963299 | At1g35140 | PHI-1       | phosphate-induced (phi-1) protein, putative similar to phi-1 GB:BAA33810 GI:3759184 from [Nicotiana tabacum];supported by full-length cDNA: Ceres:118937.                                 | 0.08185 | -0.88768 | 0.12952 | 7.72109  | 1.38E-24 |
| 946399 | At3g55840 | 251774_at   | nematode resistance protein-like protein Hs1pro-1 nematode resistance gene, Beta procumbens, EMBL:BPU79733;supported by full-length cDNA: Ceres:149697.                                   | 0.10199 | -0.88129 | 0.13143 | 7.60834  | 1.84E-15 |
| 943399 | At5g47370 | HAT2        | homeobox-leucine zipper protein-like ; supported by cDNA: gi_15450446_gb_AY052324.1_                                                                                                      | 0.05954 | -0.86988 | 0.13493 | 7.41109  | 0        |



|        |           |           |                                                                                                                                                                                       |         |          |         |         |          |
|--------|-----------|-----------|---------------------------------------------------------------------------------------------------------------------------------------------------------------------------------------|---------|----------|---------|---------|----------|
| 942556 | At5g57560 | TCH4      | TCH4 protein (gb AAA92363.1) ; supported by cDNA: gi_14194112_gb_AF367262.1_AF367262                                                                                                  | 0.03265 | -0.86658 | 0.13596 | 7.3549  | 0        |
| 953710 | At3g03830 | 259332_at | putative auxin-induced protein similar to SAUR GB:BAA25434 [Raphanus sativus]                                                                                                         | 0.07365 | -0.85466 | 0.13975 | 7.15576 | 2.86E-28 |
| 945609 | At5g02760 | PP2C      | protein phosphatase - like protein protein phosphatase 2C homolog, Mesembryanthemum crystallinum, EMBL:AF097667                                                                       | 0.0428  | -0.83338 | 0.14676 | 6.81373 | 0        |
| 943739 | At5g44260 | 249065_at | putative protein similar to unknown protein (gb AAD10689.1); supported by cDNA: gi_14334449_gb_AY034916.1_                                                                            | 0.07633 | -0.80716 | 0.1559  | 6.41453 | 2.34E-23 |
| 945281 | At5g07010 | ST2A      | steroid sulfotransferase-like protein ;supported by full-length cDNA: Ceres:124067.                                                                                                   | 0.11132 | -0.79889 | 0.15889 | 6.2935  | 1.48E-10 |
| 945642 | At5g02200 | FHL       | hypothetical protein                                                                                                                                                                  | 0.12369 | -0.79193 | 0.16146 | 6.19341 | 2.46E-08 |
| 958225 | At2g37030 | 263890_at | putative auxin-induced protein                                                                                                                                                        | 0.12761 | -0.78783 | 0.16299 | 6.13516 | 1.01E-07 |
| 945604 | At5g02580 | 251012_at | putative protein ;supported by full-length cDNA: Ceres:16476.                                                                                                                         | 0.17813 | -0.78745 | 0.16314 | 6.12983 | 7.11E-04 |
| 942799 | At5g54470 | 248160_at | putative protein similar to unknown protein (pir T05755)                                                                                                                              | 0.2048  | -0.78114 | 0.16553 | 6.04137 | 0.007789 |
| 961174 | At2g44910 | ATHB4     | homeodomain transcription factor (ATHB-4)                                                                                                                                             | 0.15729 | -0.77251 | 0.16885 | 5.92255 | 8.60E-05 |
| 964006 | At2g23170 | GH3.3     | unknown protein                                                                                                                                                                       | 0.02785 | -0.75734 | 0.17485 | 5.71921 | 0        |
| 955504 | At1g75450 | CKX5      | cytokinin oxidase, putative similar to GB:CAA77151 from [Zea mays] (Plant J. 17 (6), 615-626 (1999))                                                                                  | 0.13363 | -0.74876 | 0.17833 | 5.60744 | 2.60E-06 |
| 953709 | At3g03840 | 259331_at | putative auxin-induced protein similar to SAUR GB:BAA25434 [Raphanus sativus]                                                                                                         | 0.07717 | -0.7418  | 0.18122 | 5.51824 | 3.15E-19 |
| 954228 | At1g69570 | 259834_at | H-protein promoter binding factor-2b nearly identical to H-protein promoter binding factor-2b (Arabidopsis thaliana) GI:3386548; supported by cDNA: gi_3386547_gb_AF079504.1_AF079504 | 0.15254 | -0.73349 | 0.18472 | 5.41367 | 1.37E-04 |
| 948743 | At4g25420 | GA20OX1   | gibberellin 20-oxidase - Arabidopsis thaliana                                                                                                                                         | 0.14163 | -0.73206 | 0.18533 | 5.39586 | 2.45E-05 |
| 944978 | At5g12050 | 250327_at | putative serine rich protein predicted proteins, Arabidopsis thaliana;supported by full-length cDNA: Ceres:36958.                                                                     | 0.05214 | -0.71671 | 0.19199 | 5.20851 | 6.45E-40 |
| 943496 | At5g46240 | KAT1      | potassium channel protein KAT1 (pir S32816) ; supported by cDNA: gi_166773_gb_M86990.1_ATHKAT1                                                                                        | 0.04344 | -0.69389 | 0.20235 | 4.94185 | 0        |
| 947153 | At3g45970 | ATEXLA1   | putative protein cim1 induced allergen, Glycine max, EMBL:U03860;supported by full-length cDNA: Ceres:27534.                                                                          | 0.04036 | -0.69379 | 0.2024  | 4.94073 | 0        |
| 963695 | At4g14560 | IAA1      | auxin-responsive protein IAA1 ;supported by full-length cDNA: Ceres:33860.                                                                                                            | 0.06853 | -0.69159 | 0.20343 | 4.91575 | 3.13E-21 |
| 945605 | At5g02540 | 251013_at | putative protein various predicted proteins, Brassica rapa, Arabidopsis thaliana;supported by full-length cDNA: Ceres:26538.                                                          | 0.06792 | -0.69035 | 0.20401 | 4.90176 | 1.52E-21 |
| 956093 | At1g18400 | BEE1      | helix-loop-helix protein homolog, putative similar to helix-loop-helix protein homolog GB:BAA87957 GI:6520231 from [Arabidopsis thaliana]                                             | 0.08144 | -0.67563 | 0.21104 | 4.73837 | 3.17E-14 |
| 945276 | At5g07000 | ST2B      | steroid sulfotransferase-like protein                                                                                                                                                 | 0.04117 | -0.65765 | 0.21996 | 4.54622 | 0        |

|        |           |           |                                                                                                                                                                                 |         |          |         |         |          |
|--------|-----------|-----------|---------------------------------------------------------------------------------------------------------------------------------------------------------------------------------|---------|----------|---------|---------|----------|
| 941705 | At5g66590 | 247074_at | putative protein contains similarity to pathogenesis-related protein;supported by full-length cDNA: Ceres:2152.                                                                 | 0.08372 | -0.64575 | 0.22607 | 4.42333 | 2.93E-12 |
| 951396 | At3g29370 | 256743_at | Expressed protein ; supported by full-length cDNA: Ceres: 22461.                                                                                                                | 0.12299 | -0.63371 | 0.23243 | 4.30236 | 2.62E-05 |
| 960217 | At2g42380 | BZIP34    | unknown protein ; supported by cDNA:<br>gi_15100052_gb_AF401299.1_AF401299                                                                                                      | 0.09474 | -0.62611 | 0.23653 | 4.22779 | 6.79E-09 |
| 956322 | At1g65920 | 261917_at | hypothetical protein similar to TMV resistance protein-like GI:9757959 from [Arabidopsis thaliana]                                                                              | 0.10716 | -0.61224 | 0.24421 | 4.09482 | 1.46E-06 |
| 944868 | At5g13700 | ATPAO1    | polyamine oxidase                                                                                                                                                               | 0.11331 | -0.60921 | 0.24592 | 4.06644 | 8.76E-06 |
| 952152 | At3g23030 | IAA2      | auxin-inducible gene (IAA2) identical to auxin-inducible gene (IAA2) GB:AF027157 [Arabidopsis thaliana] (Plant Physiol. 115, 1730 (1997))                                       | 0.03852 | -0.60891 | 0.24609 | 4.06357 | 0        |
| 962983 | At5g25190 | 246932_at | ethylene-responsive element - like protein ethylene-responsive element binding protein homolog, Stylosanthes hamata, EMBL:U91857; supported by cDNA: gi_15010715_gb_AY045659.1_ | 0.08963 | -0.60763 | 0.24681 | 4.05166 | 2.26E-09 |
| 953248 | At3g06370 | NHX4      | putative sodium proton exchanger similar to sodium proton exchanger (Nhx1) GB:AAD16946 [Arabidopsis thaliana]                                                                   | 0.10789 | -0.58723 | 0.25868 | 3.86574 | 6.26E-06 |
| 947626 | At4g38400 | ATEXLA2   | putative pollen allergen pollen allergen - Pinus radiata, PID:g2935527; supported by cDNA: gi_14190354_gb_AF378855.1_AF378855                                                   | 0.05973 | -0.58586 | 0.2595  | 3.85352 | 5.00E-20 |
| 947778 | At4g36110 | 253103_at | putative auxin-induced protein high similarity to auxin-induced protein 15A, soybean, PIR2:JQ1096; supported by cDNA: gi_13194817_gb_AF349524.1_AF349524                        | 0.10195 | -0.5845  | 0.26032 | 3.84145 | 1.31E-06 |
| 950221 | At4g01250 | WRKY22    | putative DNA-binding protein ; supported by cDNA: gi_15028172_gb_AY045909.1_                                                                                                    | 0.07375 | -0.57894 | 0.26367 | 3.79263 | 1.05E-12 |
| 943913 | At5g41400 | 249306_at | RING zinc finger protein-like ;supported by full-length cDNA: Ceres:207148.                                                                                                     | 0.05965 | -0.57543 | 0.26581 | 3.76211 | 2.31E-19 |
| 944084 | At5g39860 | PRE1      | putative protein putative DNA-binding protein - Arabidopsis thaliana, EMBL:AC011765;supported by full-length cDNA: Ceres:4734.                                                  | 0.13735 | -0.57466 | 0.26628 | 3.75541 | 0.00195  |
| 961807 | At2g26710 | BAS1      | putative cytochrome P450                                                                                                                                                        | 0.06693 | -0.57449 | 0.26638 | 3.754   | 2.98E-15 |
| 955287 | At1g02660 | 260915_at | hypothetical protein similar to hypothetical protein GB:CAB83109 GI:7362739 from [Arabidopsis thaliana]; supported by cDNA: gi_15081706_gb_AY048246.1_                          | 0.06301 | -0.56501 | 0.27227 | 3.67287 | 1.11E-16 |
| 946099 | At3g59900 | ARGOS     | putative protein hypothetical protein At2g44080 - Arabidopsis thaliana, EMBL:AC004005                                                                                           | 0.07852 | -0.56402 | 0.27288 | 3.66458 | 1.43E-10 |
| 954131 | At1g29490 | 259785_at | unknown protein ;supported by full-length cDNA: Ceres:252195.                                                                                                                   | 0.08536 | -0.55599 | 0.27798 | 3.59739 | 1.23E-08 |
| 963761 | At4g16515 | 245336_at | Expressed protein ; supported by full-length cDNA: Ceres: 6580.                                                                                                                 | 0.04268 | -0.5521  | 0.28048 | 3.56535 | 2.91E-35 |
| 954133 | At1g29460 | 259787_at | auxin-induced protein, putative similar to SP:P33083 from [Glycine max];supported by full-length cDNA: Ceres:147801.                                                            | 0.07103 | -0.54867 | 0.2827  | 3.53732 | 2.72E-12 |
| 964362 | At1g29440 | 257506_at | auxin-induced protein, putative similar to SP:P33083 from [Glycine max]                                                                                                         | 0.04751 | -0.548   | 0.28314 | 3.5318  | 6.17E-28 |

|        |           |           |                                                                                                                                                                                   |         |          |         |         |          |
|--------|-----------|-----------|-----------------------------------------------------------------------------------------------------------------------------------------------------------------------------------|---------|----------|---------|---------|----------|
| 948574 | At4g27280 | 253915_at | putative protein centrin, <i>Marsilea vestita</i> ;supported by full-length cDNA: Ceres:13072.                                                                                    | 0.03281 | -0.54266 | 0.28664 | 3.48865 | 0        |
| 959648 | At2g28400 | 265276_at | hypothetical protein predicted by genscan and genefinder                                                                                                                          | 0.08643 | -0.53698 | 0.29042 | 3.44334 | 8.01E-08 |
| 947838 | At4g34770 | 253207_at | putative protein small auxin up-regulated RNA, <i>Malus domestica</i> , gb:Z93766                                                                                                 | 0.0641  | -0.53052 | 0.29477 | 3.3925  | 3.71E-14 |
| 960166 | At2g18010 | 265806_at | putative auxin-regulated protein                                                                                                                                                  | 0.10682 | -0.52384 | 0.29934 | 3.34074 | 8.89E-05 |
| 952200 | At3g28420 | 257900_at | hypothetical protein predicted by genemark.hmm                                                                                                                                    | 0.08066 | -0.52374 | 0.2994  | 3.33998 | 1.40E-08 |
| 947379 | At3g42800 | 252765_at | putative protein hypothetical proteins - <i>Arabidopsis thaliana</i>                                                                                                              | 0.06566 | -0.52239 | 0.30034 | 3.32956 | 4.61E-13 |
| 946880 | At3g50340 | 252204_at | putative protein predicted protein, <i>Arabidopsis thaliana</i>                                                                                                                   | 0.03713 | -0.52077 | 0.30146 | 3.31715 | 1.42E-41 |
| 960926 | At2g35290 | 266545_at | hypothetical protein predicted by genefinder                                                                                                                                      | 0.12754 | -0.51591 | 0.30485 | 3.2803  | 0.003082 |
| 961190 | At2g22810 | ACS4      | 1-aminocyclopropane-1-carboxylate synthase (ACS4) identical to GB:U23481; supported by cDNA: gi_12083215_gb_AF332404.1_AF332404                                                   | 0.15676 | -0.51097 | 0.30834 | 3.24317 | 0.047397 |
| 943130 | At5g51190 | 248448_at | putative protein contains similarity to ethylene responsive element binding factor;supported by full-length cDNA: Ceres:2347.                                                     | 0.05505 | -0.50999 | 0.30904 | 3.23585 | 7.71E-18 |
| 946750 | At3g50890 | AtHB28    | putative protein hypothetical protein T8K22.16 - <i>Arabidopsis thaliana</i> , chromosome II BAC T8K22, PIR2:T00609;supported by full-length cDNA: Ceres:20695.                   | 0.09815 | -0.50671 | 0.31138 | 3.21153 | 2.49E-05 |
| 954119 | At1g29500 | 259773_at | auxin-induced protein, putative similar to SP:P33083 from [ <i>Glycine max</i> ]                                                                                                  | 0.03948 | -0.50631 | 0.31167 | 3.20853 | 1.12E-34 |
| 957573 | At1g10550 | XTH33     | putative endoxyloglucan transferase similar to xyloglucan endotransglycosylase-related protein XTR4 (pir S71223);supported by full-length cDNA: Ceres:27813.                      | 0.09019 | -0.50029 | 0.31602 | 3.16437 | 3.55E-06 |
| 948765 | At4g24570 | dic-02    | putative mitochondrial uncoupling protein mitochondrial uncoupling protein, <i>Arabidopsis thaliana</i> (thale cress), PATX:E1316826;supported by full-length cDNA: Ceres:119476. | 0.0431  | -0.49673 | 0.31862 | 3.13856 | 6.70E-28 |
| 949357 | At4g13790 | 254685_at | SAUR-AC - like protein (small auxin up RNA) SAUR-AC1, <i>Arabidopsis thaliana</i> , S70188;supported by full-length cDNA: Ceres:8965.                                             | 0.14274 | -0.49446 | 0.32029 | 3.12218 | 0.024773 |
| 954130 | At1g29450 | 259784_at | auxin-induced protein, putative similar to SP:P33083 from [ <i>Glycine max</i> ];supported by full-length cDNA: Ceres:29931.                                                      | 0.06178 | -0.49338 | 0.32109 | 3.11441 | 3.73E-13 |
| 941754 | At5g66080 | PP2C      | protein phosphatase 2C-like protein                                                                                                                                               | 0.06526 | -0.48886 | 0.32445 | 3.08216 | 1.55E-11 |
| 950307 | At3g29575 | AFP3      | hypothetical protein                                                                                                                                                              | 0.10265 | -0.48778 | 0.32525 | 3.07453 | 1.78E-04 |
| 957650 | At1g10560 | PUB18     | putative zinc-binding protein similar to zinc-binding protein (gi 3249068)                                                                                                        | 0.14271 | -0.48175 | 0.3298  | 3.03215 | 0.033358 |
| 947147 | At3g45960 | ATEXLA3   | putative protein cim1 induced allergen, <i>Glycine max</i> , EMBL:U03860                                                                                                          | 0.1317  | -0.47169 | 0.33753 | 2.96269 | 0.017082 |
| 945190 | At5g08130 | BIM1      | basic helix-loop-helix (bHLH) family protein involved in brassinosteroid signaling.                                                                                               | 0.08343 | -0.46947 | 0.33926 | 2.9476  | 2.33E-06 |
| 955188 | At1g21910 | 260856_at | TINY-like protein similar to TINY GB:CAA64359 GI:1246403 from [ <i>Arabidopsis thaliana</i> ];supported by full-length cDNA: Ceres:19721.                                         | 0.05499 | -0.46703 | 0.34117 | 2.93108 | 6.16E-15 |

|        |           |             |                                                                                                                                                                     |         |          |         |         |          |
|--------|-----------|-------------|---------------------------------------------------------------------------------------------------------------------------------------------------------------------|---------|----------|---------|---------|----------|
| 959242 | At1g61260 | 264879_at   | cotton fiber expressed protein, putative similar to cotton fiber expressed protein 1 GI:3264828 from [Gossypium hirsutum]                                           | 0.11609 | -0.46688 | 0.34129 | 2.9301  | 0.003611 |
| 942803 | At5g54490 | PBP1        | putative protein similar to unknown protein (pir  T05752);supported by full-length cDNA: Ceres:109272.                                                              | 0.05533 | -0.45927 | 0.34732 | 2.8792  | 3.09E-14 |
| 961385 | At2g31010 | 267201_at   | putative protein kinase contains a protein kinase domain profile (PDOC00100)                                                                                        | 0.11052 | -0.45747 | 0.34876 | 2.86728 | 0.00195  |
| 960446 | At2g18790 | PHYB        | phytochrome B Identical to GB:X17342                                                                                                                                | 0.03904 | -0.45629 | 0.34971 | 2.85949 | 1.12E-28 |
| 963364 | At5g04190 | PKS4        | phytochrome kinase substrate 1 - like protein                                                                                                                       | 0.10106 | -0.44468 | 0.35919 | 2.78406 | 0.000711 |
| 942968 | At5g52890 | 248278_at   | putative protein similar to unknown protein (pir  T05472)                                                                                                           | 0.0994  | -0.44363 | 0.36005 | 2.77737 | 6.25E-04 |
| 943065 | At5g51670 | 248423_at   | putative protein contains similarity to unknown protein (emb CAB85560.1)                                                                                            | 0.06277 | -0.43633 | 0.36616 | 2.73107 | 6.92E-10 |
| 963768 | At4g16770 | 245307_at   | gibberellin oxidase-like protein non-consensus GG acceptor splice site at exon 8; supported by cDNA: gi_13265536_gb_AF324704.2_AF324704                             | 0.06163 | -0.4361  | 0.36635 | 2.72962 | 3.01E-10 |
| 949396 | At4g13260 | YUC2        | putative protein dimethylaniline monooxygenase (N-oxide-forming) (EC1.14.13.8) -Oryctolagus cuniculus,PID:g164989                                                   | 0.04834 | -0.43376 | 0.36834 | 2.71492 | 1.06E-16 |
| 958412 | At2g21200 | 264021_at   | putative auxin-regulated protein ;supported by full-length cDNA: Ceres:7141.                                                                                        | 0.08194 | -0.42966 | 0.37183 | 2.6894  | 1.72E-05 |
| 961679 | At2g45600 | 267503_at   | unknown protein ; supported by full-length cDNA: Ceres:36855.                                                                                                       | 0.0709  | -0.42142 | 0.37895 | 2.63889 | 4.04E-07 |
| 961160 | At2g30040 | MAPKKK14    | putative protein kinase contains a protein kinase domain profile (PDOC00100)                                                                                        | 0.04648 | -0.41136 | 0.38783 | 2.57848 | 3.02E-16 |
| 955780 | At1g21050 | 261456_at   | hypothetical protein predicted by genemark.hmm;supported by full-length cDNA: Ceres:3200.                                                                           | 0.04522 | -0.41057 | 0.38854 | 2.57376 | 4.11E-17 |
| 949514 | At4g11280 | ACS6        | ACC synthase (AtACS-6) ; supported by cDNA: gi_16226285_gb_AF428292.1_AF428292                                                                                      | 0.04059 | -0.40541 | 0.39318 | 2.54336 | 8.77E-21 |
| 947577 | At4g38850 | SAUR15      | small auxin up RNA (SAUR-AC1) ;supported by full-length cDNA: Ceres:14973.                                                                                          | 0.08221 | -0.40118 | 0.39703 | 2.51871 | 9.83E-05 |
| 950403 | At4g10150 | 255802_s_at | putative protein RING-H2 finger protein RHA1a, Arabidopsis thaliana,AF078683                                                                                        | 0.08946 | -0.40034 | 0.3978  | 2.51383 | 5.95E-04 |
| 948567 | At4g27260 | WES1        | GH3 like protein GH3 protein, Glycine max., PIR2:S17433                                                                                                             | 0.03234 | -0.39787 | 0.40006 | 2.49961 | 8.11E-32 |
| 948728 | At4g25260 | 254110_at   | putative protein pectinesterase - Citrus sinensis, PID:g2098705                                                                                                     | 0.03382 | -0.39736 | 0.40054 | 2.49664 | 5.51E-29 |
| 942240 | At5g60840 | 247596_at   | putative protein predicted protein, Drosophila melanogaster                                                                                                         | 0.08303 | -0.39562 | 0.40215 | 2.48666 | 1.68E-04 |
| 958046 | At1g04240 | SHY2        | putative auxin-induced protein AUX2-11 Match to Arabidopsis IAA3 (gb U18406). EST gb T04296 comes from this gene; supported by cDNA: gi_972910_gb_U18406.1_ATU18406 | 0.04451 | -0.3918  | 0.4057  | 2.46488 | 4.60E-16 |
| 946167 | At3g58640 | 251526_at   | putative protein several serine/threonine-specific protein kinases                                                                                                  | 0.02412 | -0.38668 | 0.41051 | 2.436   | 0        |
| 949688 | At4g08950 | EXO         | putative phi-1-like phosphate-induced protein ;supported by full-length cDNA: Ceres:3552.                                                                           | 0.04643 | -0.38189 | 0.41506 | 2.40927 | 5.63E-14 |

|        |           |             |                                                                                                                                                                     |         |          |         |         |          |
|--------|-----------|-------------|---------------------------------------------------------------------------------------------------------------------------------------------------------------------|---------|----------|---------|---------|----------|
| 958603 | At1g09250 | 264264_at   | unknown protein ESTs gb T04610, gb N38459, gb T45174, gb R30481 and gb N64971 come from this gene;supported by full-length cDNA: Ceres:9228.                        | 0.03994 | -0.38144 | 0.41549 | 2.40678 | 5.75E-19 |
| 952407 | At3g19380 | PUB25       | hypothetical protein predicted genemark;supported by full-length cDNA: Ceres:255040.                                                                                | 0.05649 | -0.37709 | 0.41967 | 2.38282 | 4.49E-09 |
| 942407 | At5g59010 | 247743_at   | protein kinase - like serine/threonine/tyrosine-specific protein kinase APK1, Arabidopsis thaliana, PIR:S28615                                                      | 0.04233 | -0.37599 | 0.42074 | 2.37679 | 2.33E-16 |
| 961537 | At2g40000 | HSPRO2      | putative nematode-resistance protein ;supported by full-length cDNA: Ceres:35056.                                                                                   | 0.0724  | -0.37565 | 0.42106 | 2.37494 | 2.21E-05 |
| 945983 | At3g60390 | HAT3        | homeobox-leucine zipper protein HAT3 ; supported by cDNA: gi_527632_gb_U09338.1_ATU09338                                                                            | 0.04969 | -0.37444 | 0.42224 | 2.3683  | 1.11E-11 |
| 948625 | At4g25810 | XTR6        | xyloglucan endo-1,4-beta-D-glucanase (XTR-6) ; supported by cDNA: gi_1244757_gb_U43488.1_ATU43488                                                                   | 0.06858 | -0.37304 | 0.4236  | 2.36069 | 6.30E-06 |
| 948277 | At4g29780 | 253643_at   | hypothetical protein ;supported by full-length cDNA: Ceres:249769.                                                                                                  | 0.09252 | -0.37166 | 0.42495 | 2.35322 | 0.003611 |
| 954136 | At1g29430 | 259790_s_at | auxin-induced protein, putative similar to SP:P33083 from [Glycine max];supported by full-length cDNA: Ceres:4119.                                                  | 0.04655 | -0.36724 | 0.4293  | 2.32937 | 7.84E-13 |
| 943327 | At5g48900 | 248681_at   | pectate lyase non-consensus AG donor splice site at exon 2; supported by full-length cDNA: Ceres: 21311.                                                            | 0.04772 | -0.36217 | 0.43434 | 2.30234 | 7.60E-12 |
| 956885 | At1g21820 | 262488_at   | unknown protein EST gb AA586241 comes from this gene                                                                                                                | 0.03451 | -0.36102 | 0.4355  | 2.29624 | 7.54E-23 |
| 942241 | At5g60860 | AtRABA1f    | GTP-binding protein - like GTP-binding protein, garden pea, PIR:T06447                                                                                              | 0.0902  | -0.35481 | 0.44176 | 2.26366 | 0.004655 |
| 960081 | At2g31980 | 265672_at   | putative cysteine proteinase inhibitor B (cystatin B) ;supported by full-length cDNA: Ceres:35447.                                                                  | 0.0762  | -0.35377 | 0.44282 | 2.25823 | 2.88E-04 |
| 956017 | At1g49780 | PUB26       | hypothetical protein predicted by genemark.hmm                                                                                                                      | 0.05949 | -0.35172 | 0.44492 | 2.24759 | 4.79E-07 |
| 946241 | At3g58120 | BZIP61      | putative protein basic leucine zipper transcription activator shoot-forming PKSF1 - Paulownia kawakamii, EMBL:AF046934;supported by full-length cDNA: Ceres:34553.  | 0.04266 | -0.35046 | 0.44621 | 2.24109 | 6.07E-14 |
| 947325 | At3g44610 | 252646_at   | protein kinase-like protein protein kinase - Solanum berthaultii, EMBL:X97980                                                                                       | 0.05908 | -0.34957 | 0.44712 | 2.23653 | 4.71E-07 |
| 958512 | At1g78970 | LUP1        | lupeol synthase identical to lupeol synthase GI:1762150 from [Arabidopsis thaliana]; supported by cDNA: gi_15450512_gb_AY052358.1_                                  | 0.10447 | -0.34847 | 0.44826 | 2.23085 | 0.03743  |
| 963920 | At2g47440 | 245176_at   | unknown protein similar to GP 2104534 AF001308 (T10M13.11)                                                                                                          | 0.03504 | -0.34334 | 0.45358 | 2.20467 | 5.46E-20 |
| 957566 | At1g54120 | 263151_at   | hypothetical protein predicted by genemark.hmm;supported by full-length cDNA: Ceres:94743.                                                                          | 0.09787 | -0.34289 | 0.45406 | 2.20235 | 0.021905 |
| 956638 | At1g70940 | PIN3        | auxin transport protein REH1, putative similar to auxin transport protein REH1 GI:3377509 from [Oryza sativa]; supported by cDNA: gi_5817300_gb_AF087818.1_AF087818 | 0.03435 | -0.34093 | 0.45611 | 2.19244 | 1.63E-20 |

|        |           |           |                                                                                                                                                  |         |          |         |         |          |
|--------|-----------|-----------|--------------------------------------------------------------------------------------------------------------------------------------------------|---------|----------|---------|---------|----------|
| 953480 | At3g02170 | LNG2      | unknown protein ;supported by full-length cDNA: Ceres:22225.                                                                                     | 0.0318  | -0.33634 | 0.46096 | 2.1694  | 2.31E-23 |
| 946869 | At3g50060 | MYB77     | R2R3-MYB transcription factor ; supported by cDNA:<br>gi_15983427_gb_AF424588.1_AF424588                                                         | 0.05137 | -0.3359  | 0.46142 | 2.16721 | 1.07E-08 |
| 946405 | At3g55980 | SZF1      | putative protein zinc finger transcription factor (PE11), Arabidopsis thaliana, EMBL:AF050463; supported by cDNA:<br>gi_15810486_gb_AY056282.1_  | 0.04614 | -0.32846 | 0.4694  | 2.13038 | 2.24E-10 |
| 960973 | At2g46310 | CRF5      | putative AP2 domain transcription factor                                                                                                         | 0.06379 | -0.32844 | 0.46942 | 2.13028 | 2.66E-05 |
| 961547 | At2g39870 | 267339_at | unknown protein ; supported by cDNA:<br>gi_13877742_gb_AF370134.1_AF370134                                                                       | 0.04338 | -0.3237  | 0.47457 | 2.10716 | 1.88E-11 |
| 948056 | At4g32350 | 253478_at | putative protein trichohyalin - human, PIR1:A45973                                                                                               | 0.0551  | -0.32265 | 0.47572 | 2.10207 | 6.70E-07 |
| 963750 | At4g14130 | XTR7      | xyloglucan endotransglycosylase-related protein XTR-7 ;supported by full-length cDNA: Ceres:33554.                                               | 0.09547 | -0.32184 | 0.47661 | 2.09817 | 0.03361  |
| 962572 | At5g15830 | AtbZIP3   | bZIP DNA-binding protein-like putative bZIP DNA-binding protein - Capsicum chinense, EMBL:AF127797                                               | 0.05186 | -0.31966 | 0.47901 | 2.08764 | 1.06E-07 |
| 946462 | At3g54810 | BME3      | putative protein GATA transcription factor 3, Arabidopsis thaliana, Y13650; supported by cDNA: gi_15724333_gb_AF412107.1_AF412107                | 0.0327  | -0.3179  | 0.48095 | 2.07921 | 1.14E-19 |
| 961657 | At2g33810 | SPL3      | putative squamosa-promoter binding protein ;supported by full-length cDNA: Ceres:10375.                                                          | 0.09339 | -0.31769 | 0.48119 | 2.0782  | 0.030565 |
| 951954 | At3g25710 | BHLH32    | putative HLH DNA-binding protein contains Pfam profile: PF00010 helix-loop-helix DNA-binding domain;supported by full-length cDNA: Ceres:247881. | 0.03855 | -0.31576 | 0.48333 | 2.06897 | 7.29E-14 |
| 948483 | At4g28240 | 253812_at | putative wound induced protein wound-induced protein - tomato (fragment), PIR2:S19773;supported by full-length cDNA: Ceres:20161.                | 0.03858 | -0.31033 | 0.48941 | 2.0433  | 2.38E-13 |
| 944588 | At5g18930 | BUD2      | S-adenosyl-L-methionine decarboxylase - like protein S-adenosyl-L-methionine decarboxylase (SAMDC3), Brassica juncea, EMBL:AF215665              | 0.07798 | -0.3089  | 0.49102 | 2.03658 | 0.004147 |
| 957387 | At1g54200 | 263002_at | hypothetical protein predicted by genemark.hmm                                                                                                   | 0.04299 | -0.30889 | 0.49103 | 2.03653 | 1.41E-10 |
| 942143 | At5g61600 | 247543_at | DNA binding protein - like DNA binding protein EREBP-4, Nicotiana tabacum, PIR:T02434;supported by full-length cDNA: Ceres:92102.                | 0.0786  | -0.3075  | 0.49261 | 2.03001 | 0.005184 |
| 951685 | At3g19680 | 257076_at | unknown protein                                                                                                                                  | 0.04269 | -0.30617 | 0.49412 | 2.0238  | 1.53E-10 |
| 942771 | At5g55250 | IAMT1     | S-adenosyl-L-methionine:salicylic acid carboxyl methyltransferase-like protein ; supported by full-length cDNA: Ceres: 37493.                    | 0.08349 | -0.30607 | 0.49423 | 2.02334 | 0.013079 |
| 944776 | At5g15160 | 250155_at | putative protein predicted proteins, Arabidopsis thaliana                                                                                        | 0.06689 | -0.3049  | 0.49557 | 2.01788 | 4.16E-04 |
| 945969 | At3g61460 | BRH1      | RING finger protein ;supported by full-length cDNA: Ceres:25801.                                                                                 | 0.02861 | -0.30488 | 0.49559 | 2.01779 | 1.05E-23 |
| 963720 | At4g17460 | HAT1      | homeobox-leucine zipper protein HAT1 (hd-zip protein 1) ;supported by full-length cDNA: Ceres:34167.                                             | 0.07411 | -0.30441 | 0.49612 | 2.01564 | 0.002549 |

|        |           |           |                                                                                                                                                                                                |         |          |         |         |          |
|--------|-----------|-----------|------------------------------------------------------------------------------------------------------------------------------------------------------------------------------------------------|---------|----------|---------|---------|----------|
| 948948 | At4g22780 | ACR7      | Translation factor EF-1 alpha - like protein translation factor EF-1 alpha genfamily, Arabidopsis thaliana, PATCHX:G1532164                                                                    | 0.08148 | -0.3041  | 0.49648 | 2.01419 | 0.010319 |
| 947827 | At4g34760 | 253255_at | putative auxin-regulated protein auxin-induced protein X15, Glycine max, PIR2:JQ1097;supported by full-length cDNA: Ceres:10510.                                                               | 0.03673 | -0.30068 | 0.50041 | 1.99838 | 7.54E-14 |
| 962639 | At5g15580 | LNG1      | putative protein unknown protein F14P3.18 - Arabidopsis thaliana, EMBL:AC009755                                                                                                                | 0.03288 | -0.30068 | 0.50041 | 1.99837 | 2.26E-17 |
| 963319 | At1g73540 | atnudt21  | unknown protein contains similarity to diphosphoinositol polyphosphate phosphohydrolase GI:3978224 from [Homo sapiens]                                                                         | 0.04434 | -0.29878 | 0.50259 | 1.98969 | 2.95E-09 |
| 947298 | At3g44260 | 252679_at | CCR4-associated factor 1-like protein CAF1_MOUSE CCR4-ASSOCIATED FACTOR 1 - Mus musculus, SWISSPROT:CAF1_MOUSE; supported by cDNA: gi_15292828_gb_AY050848.1_                                  | 0.08119 | -0.29835 | 0.50309 | 1.9877  | 0.012643 |
| 963801 | At4g17490 | ATERF6    | ethylene responsive element binding factor-like protein (AtERF6) ; supported by cDNA: gi_3298497_dbj_AB013301.1_AB013301                                                                       | 0.05209 | -0.29687 | 0.50481 | 1.98095 | 1.56E-06 |
| 944559 | At5g22500 | FAR1      | male sterility 2-like protein (emb CAA68191.1) ; supported by cDNA: gi_14334737_gb_AY035042.1_                                                                                                 | 0.06545 | -0.29392 | 0.50825 | 1.96753 | 5.58E-04 |
| 956495 | At1g59500 | GH3.4     | auxin-regulated protein GH3, putative similar to auxin-regulated protein GH3 GI:18590 from [Glycine max]                                                                                       | 0.0562  | -0.29294 | 0.5094  | 1.96311 | 1.96E-05 |
| 959156 | At1g03610 | 264836_at | unknown protein similar to hypothetical protein GB:AAD11584;supported by full-length cDNA: Ceres:123030.                                                                                       | 0.05432 | -0.29052 | 0.51225 | 1.95217 | 1.02E-05 |
| 957228 | At1g14920 | GAI       | signal response protein (GAI) identical to GAI GB:CAA75492 GI:2569938 [Arabidopsis thaliana] (Genes Dev. In press); supported by cDNA: gi_16648833_gb_AY058194.1_                              | 0.02495 | -0.28922 | 0.51379 | 1.94633 | 3.21E-28 |
| 952279 | At3g17100 | 257894_at | unknown protein ; supported by cDNA: gi_15010765_gb_AY045684.1_                                                                                                                                | 0.05426 | -0.28915 | 0.51386 | 1.94605 | 1.13E-05 |
| 955662 | At1g36940 | 261292_at | hypothetical protein predicted by genemark.hmm                                                                                                                                                 | 0.06285 | -0.28695 | 0.51648 | 1.9362  | 4.04E-04 |
| 963266 | At1g32190 | 245784_at | hypothetical protein similar to hypothetical protein GB:AAD18105 GI:4337191 from [Arabidopsis thaliana]                                                                                        | 0.03246 | -0.28546 | 0.51825 | 1.92956 | 4.83E-16 |
| 952525 | At3g24500 | MBF1C     | ethylene-responsive transcriptional coactivator, putative similar to GB:AAD46402 from [Lycopersicon esculentum] (Plant J. 18 (6), 589-600 (1999));supported by full-length cDNA: Ceres:158734. | 0.0764  | -0.2805  | 0.52421 | 1.90764 | 0.012643 |
| 945272 | At5g06930 | 250653_at | putative protein strong similarity to unknown protein (gb AAD23715.1)                                                                                                                          | 0.04219 | -0.27737 | 0.52799 | 1.89397 | 8.48E-09 |
| 948053 | At4g32290 | 253475_at | putative protein predicted protein, Arabidopsis thaliana, PATCHX:G2252634                                                                                                                      | 0.03543 | -0.2766  | 0.52894 | 1.89059 | 1.46E-12 |
| 944270 | At5g37770 | TCH2      | CALMODULIN-RELATED PROTEIN 2, TOUCH-INDUCED (TCH2) ;supported by full-length cDNA: Ceres:25475.                                                                                                | 0.03016 | -0.27594 | 0.52973 | 1.88774 | 2.20E-17 |
| 954129 | At1g29510 | SAUR68    | auxin-induced protein, putative similar to SP:P33083 from [Glycine max];supported by full-length cDNA: Ceres:9311.                                                                             | 0.04754 | -0.27311 | 0.5332  | 1.87548 | 1.24E-06 |

|        |           |             |                                                                                                                                                           |         |          |         |         |          |
|--------|-----------|-------------|-----------------------------------------------------------------------------------------------------------------------------------------------------------|---------|----------|---------|---------|----------|
| 955401 | At1g01260 | 261050_at   | transcription factor MYC7E, putative similar to transcription factor MYC7E GB:AAD15818 GI:4321762 from [Zea mays]                                         | 0.06247 | -0.27268 | 0.53373 | 1.87361 | 0.000711 |
| 943627 | At5g45340 | CYP707A3    | cytochrome P450                                                                                                                                           | 0.06709 | -0.27239 | 0.53409 | 1.87236 | 0.003082 |
| 943185 | At5g49630 | AAP6        | amino acid permease 6 (emb CAA65051.1)                                                                                                                    | 0.06698 | -0.27234 | 0.53414 | 1.87216 | 0.003082 |
| 955286 | At1g02640 | BXL2        | beta-xylosidase, putative similar to beta-xylosidase GB:Z84377 GI:2102655 from [Aspergillus niger]; supported by cDNA: gi_14194120_gb_AF367266.1_AF367266 | 0.07837 | -0.27053 | 0.53638 | 1.86434 | 0.025963 |
| 951270 | At3g28340 | GATL10      | unknown protein                                                                                                                                           | 0.06116 | -0.26936 | 0.53782 | 1.85935 | 0.000711 |
| 945936 | At3g62100 | IAA30       | auxin-induced protein homolog auxin-induced protein IAA20 - Arabidopsis thaliana, PIR:T02188                                                              | 0.06218 | -0.26766 | 0.53993 | 1.85208 | 0.001358 |
| 960718 | At2g27080 | 266316_at   | unknown protein ; supported by cDNA: gi_15450380_gb_AY052291.1_                                                                                           | 0.051   | -0.26739 | 0.54027 | 1.85092 | 1.72E-05 |
| 943175 | At5g50570 | 248524_s_at | putative protein contains similarity to squamosa promoter binding protein;supported by full-length cDNA: Ceres:113229.                                    | 0.0412  | -0.26569 | 0.54239 | 1.84368 | 1.85E-08 |
| 956886 | At1g21830 | 262489_at   | unknown protein EST gb T21171 comes from this gene                                                                                                        | 0.03797 | -0.26556 | 0.54255 | 1.84316 | 5.14E-10 |
| 958273 | At2g36220 | 263931_at   | unknown protein ;supported by full-length cDNA: Ceres:12251.                                                                                              | 0.04469 | -0.26425 | 0.54419 | 1.83761 | 4.78E-07 |
| 955579 | At1g32920 | 261193_at   | unknown protein ; supported by cDNA: gi_15450636_gb_AY052686.1_                                                                                           | 0.047   | -0.26376 | 0.5448  | 1.83553 | 2.49E-06 |
| 960806 | At2g43290 | MSS3        | putative calcium binding protein ;supported by full-length cDNA: Ceres:31535.                                                                             | 0.02529 | -0.25972 | 0.5499  | 1.81851 | 5.29E-22 |
| 962317 | At4g36780 | 246284_at   | putative protein                                                                                                                                          | 0.0484  | -0.25635 | 0.55418 | 1.80447 | 1.33E-05 |
| 949665 | At4g09890 | PMP         | putative protein Arabidopsis thaliana chromosome II BAC T30B22 genomic sequence, gene T30B22.22, PID:g2529679                                             | 0.02715 | -0.25537 | 0.55543 | 1.8004  | 2.12E-18 |
| 943481 | At5g47380 | 248784_at   | putative protein similar to unknown protein (pir T02421)                                                                                                  | 0.04727 | -0.25481 | 0.55615 | 1.79809 | 8.20E-06 |
| 959567 | At2g43060 | 265245_at   | unknown protein                                                                                                                                           | 0.06364 | -0.25413 | 0.55702 | 1.79528 | 0.004147 |
| 961495 | At2g23760 | BLH4        | putative homeodomain transcription factor ; supported by cDNA: gi_13877512_gb_AF353092.1_AF353092                                                         | 0.03847 | -0.25169 | 0.56016 | 1.78521 | 1.04E-08 |
| 954598 | At1g68550 | CPuORF53    | putative AP2 domain transcription factor contains Pfam profile: PF00847 AP2 domain; supported by cDNA: gi_16604674_gb_AY059782.1_                         | 0.02948 | -0.25167 | 0.56019 | 1.78512 | 4.47E-15 |
| 948434 | At4g28640 | IAA11       | early auxin-inducible protein 11 (IAA11) ; supported by cDNA: gi_972924_gb_U18413.1_ATU18413                                                              | 0.05289 | -0.25164 | 0.56023 | 1.78499 | 1.73E-04 |
| 954359 | At1g76600 | 259979_at   | unknown protein ;supported by full-length cDNA: Ceres:29624.                                                                                              | 0.04834 | -0.24979 | 0.56261 | 1.77742 | 2.45E-05 |
| 941868 | At5g65140 | 247228_at   | trehalose-6-phosphate phosphatase                                                                                                                         | 0.06985 | -0.24906 | 0.56355 | 1.77445 | 0.017968 |
| 942391 | At5g58650 | PSY1        | putative protein ; supported by cDNA: gi_15529263_gb_AY052256.1_                                                                                          | 0.05269 | -0.24756 | 0.56551 | 1.76831 | 2.26E-04 |
| 942802 | At5g54510 | DFL1        | auxin-responsive-like protein ; supported by cDNA: gi_11041725_dbj_AB050596.1_AB050596                                                                    | 0.01922 | -0.24684 | 0.56645 | 1.76538 | 9.16E-35 |



|        |           |           |                                                                                                                                                                         |         |          |         |         |          |
|--------|-----------|-----------|-------------------------------------------------------------------------------------------------------------------------------------------------------------------------|---------|----------|---------|---------|----------|
| 951749 | At3g15210 | ERF4      | ethylene responsive element binding factor 4 (AtERF4) identical to GB:BAA32421 from [Arabidopsis thaliana];supported by full-length cDNA: Ceres:22775.                  | 0.03624 | -0.24666 | 0.56669 | 1.76464 | 1.88E-09 |
| 953424 | At3g04860 | 259093_at | unknown protein similar to putative protein GB:CAB40986 [Arabidopsis thaliana];supported by full-length cDNA: Ceres:5170.                                               | 0.05318 | -0.24507 | 0.56876 | 1.75821 | 3.34E-04 |
| 957805 | At2g17230 | EXL5      | unknown protein ;supported by full-length cDNA: Ceres:641.                                                                                                              | 0.05314 | -0.24443 | 0.5696  | 1.75562 | 3.46E-04 |
| 955034 | At1g19380 | 260656_at | hypothetical protein predicted by genemark.hmm                                                                                                                          | 0.06049 | -0.24427 | 0.56981 | 1.75498 | 0.003082 |
| 943790 | At5g43700 | ATAUX2-11 | auxin-induced protein AUX2-11 (sp P33077)                                                                                                                               | 0.0324  | -0.24424 | 0.56984 | 1.75487 | 1.09E-11 |
| 951962 | At3g16800 | 257650_at | protein phosphatase, putative similar to protein phosphatase-2C GB:AAC36699 from [Mesembryanthemum crystallinum];supported by full-length cDNA: Ceres:6305.             | 0.05707 | -0.24352 | 0.57079 | 1.75195 | 0.001358 |
| 948204 | At4g31000 | 253571_at | putative calmodulin-binding protein calmodulin-binding protein, Nicotiana tabacum                                                                                       | 0.05739 | -0.24256 | 0.57206 | 1.74806 | 0.001358 |
| 946283 | At3g57795 | 251601_at | Expressed protein ; supported by full-length cDNA: Ceres: 19033.                                                                                                        | 0.04633 | -0.24094 | 0.5742  | 1.74157 | 2.08E-05 |
| 956372 | At1g64640 | 261975_at | unknown protein                                                                                                                                                         | 0.03862 | -0.23888 | 0.57693 | 1.73331 | 9.46E-08 |
| 953627 | At3g11490 | 259287_at | putative rac GTPase activating protein similar to rac GTPase activating protein 1 GB:AAC62624 [Lotus japonicus]                                                         | 0.04666 | -0.23745 | 0.57883 | 1.72762 | 3.61E-05 |
| 943231 | At5g50130 | 248539_at | ribitol dehydrogenase-like ; supported by cDNA: gi_15146201_gb_AY049242.1_                                                                                              | 0.06973 | -0.23741 | 0.57888 | 1.72747 | 0.030352 |
| 947535 | At4g39400 | BRI1      | brassinosteroid insensitive 1 gene (BRI1)                                                                                                                               | 0.03324 | -0.235   | 0.5821  | 1.71791 | 3.10E-10 |
| 945836 | At3g62720 | XT1       | alpha galactosyltransferase-like protein alpha galactosyltransferase - Trigonella foenum-graecum, EMBL:TFO245478; supported by cDNA: gi_15983425_gb_AF424587.1_AF424587 | 0.03923 | -0.23387 | 0.58361 | 1.71346 | 3.66E-07 |
| 961613 | At2g44500 | 267393_at | similar to axi 1 protein from Nicotiana tabacum                                                                                                                         | 0.02771 | -0.23299 | 0.5848  | 1.70999 | 1.27E-14 |
| 946377 | At3g55740 | PROT2     | proline transporter 2                                                                                                                                                   | 0.02857 | -0.23062 | 0.588   | 1.70067 | 1.88E-13 |
| 954001 | At1g69010 | BIM2      | putative DNA-binding protein predicted by genscan, multiple est matches; Pfam HMM hit: helix-loop-helix DNA-binding domain;supported by full-length cDNA: Ceres:27793.  | 0.05663 | -0.23053 | 0.58813 | 1.70031 | 0.003082 |
| 944041 | At5g40540 | 249361_at | protein kinase - like protein protein kinase ATN1, Arabidopsis thaliana, PIR:S61766                                                                                     | 0.05742 | -0.22939 | 0.58967 | 1.69586 | 0.003611 |
| 955859 | At1g21060 | 261451_at | unknown protein                                                                                                                                                         | 0.06429 | -0.2279  | 0.5917  | 1.69003 | 0.019172 |
| 958670 | At1g78700 | 264248_at | hypothetical protein predicted by genscan+; supported by cDNA: gi_15215801_gb_AY050430.1_                                                                               | 0.06538 | -0.22698 | 0.59295 | 1.68648 | 0.024356 |
| 942087 | At5g62020 | HSFB2A    | heat shock factor 6                                                                                                                                                     | 0.05534 | -0.2252  | 0.59539 | 1.67957 | 0.003082 |
| 951680 | At3g28180 | ATCSLC04  | unknown protein ; supported by cDNA: gi_15810494_gb_AY056286.1_                                                                                                         | 0.02853 | -0.22291 | 0.59853 | 1.67075 | 1.39E-12 |
| 946500 | At3g54200 | 251879_at | putative protein hin1 protein, Nicotiana tabacum, PIR:T03265;supported by full-length cDNA: Ceres:1678.                                                                 | 0.03965 | -0.22275 | 0.59876 | 1.67013 | 2.46E-06 |

|        |           |           |                                                                                                                                                                   |         |          |         |         |          |
|--------|-----------|-----------|-------------------------------------------------------------------------------------------------------------------------------------------------------------------|---------|----------|---------|---------|----------|
| 950055 | At4g03190 | GRH1      | F-box protein GRR1-like protein 1, AtFBL18 almost identical to GRR1-like protein 1 GI:12658970 from [Arabidopsis thaliana]                                        | 0.02126 | -0.2217  | 0.6002  | 1.66611 | 1.04E-22 |
| 946660 | At3g53180 | 251973_at | nodulin / glutamate-ammonia ligase - like protein MtN6 - nodulin 6, Medicago truncatula, EMBL:MET133118                                                           | 0.0364  | -0.2205  | 0.60187 | 1.66148 | 2.06E-07 |
| 953043 | At3g08640 | 258692_at | unknown protein                                                                                                                                                   | 0.02751 | -0.21911 | 0.6038  | 1.65619 | 4.33E-13 |
| 947805 | At4g35470 | 253136_at | putative protein leucine-rich protein - Helianthus annuus (common sunflower),PIR:T12704                                                                           | 0.04525 | -0.21803 | 0.60529 | 1.65209 | 1.32E-04 |
| 945912 | At3g61830 | ARF18     | auxin response factor-like protein auxin response factor 9 - Arabidopsis thaliana, PIR:T08917; supported by cDNA: gi_16604602_gb_AY059746.1_                      | 0.04679 | -0.21683 | 0.60697 | 1.64752 | 2.97E-04 |
| 944484 | At5g22940 | F8H       | putative protein strong similarity to unknown protein (gb AAC98455.1)                                                                                             | 0.0538  | -0.21658 | 0.60733 | 1.64655 | 0.003611 |
| 946152 | At3g59350 | 251494_at | protein kinase-like protein Pto kinase interactor 1 - Lycopersicon esculentum, EMBL:U28007; supported by cDNA: gi_15451117_gb_AY054639.1_                         | 0.03391 | -0.21563 | 0.60865 | 1.64297 | 3.23E-08 |
| 954610 | At1g74670 | 260221_at | GAST1-like protein similar to GAST1 protein precursor GB:P27057 [Lycopersicon esculentum] (induced by gibberellins, inhibited by ABA Plant J 1992 Mar;2(2):153-9) | 0.04036 | -0.21446 | 0.61029 | 1.63856 | 1.23E-05 |
| 952545 | At3g13980 | 258196_at | hypothetical protein predicted by genemark.hmm                                                                                                                    | 0.04815 | -0.21444 | 0.61032 | 1.63849 | 6.51E-04 |
| 960949 | At2g14900 | 266613_at | similar to gibberellin-regulated proteins                                                                                                                         | 0.05867 | -0.21406 | 0.61086 | 1.63704 | 0.01354  |
| 948101 | At4g31820 | ENP       | putative protein various predicted proteins                                                                                                                       | 0.0528  | -0.21322 | 0.61205 | 1.63387 | 0.003082 |
| 941836 | At5g64780 | 247255_at | putative protein similar to unknown protein (pir  T04031); supported by full-length cDNA: Ceres: 144066.                                                          | 0.06483 | -0.21164 | 0.61427 | 1.62795 | 0.046724 |
| 947483 | At4g39800 | MIPS1     | myo-inositol-1-phosphate synthase ;supported by full-length cDNA: Ceres:1978.                                                                                     | 0.03174 | -0.21008 | 0.61649 | 1.62209 | 6.42E-09 |
| 958875 | At1g09570 | PHYA      | putative phytochrome A similar to GB:AAA21351; supported by cDNA: gi_14517371_gb_AY039520.1_                                                                      | 0.04792 | -0.20978 | 0.61691 | 1.62098 | 0.000711 |
| 955218 | At1g06850 | AtbZIP52  | b-Zip DNA binding protein, putative similar to b-Zip DNA binding protein GB:CAB06697 GI:2246376 from [Arabidopsis thaliana]                                       | 0.04443 | -0.20943 | 0.61741 | 1.61968 | 2.13E-04 |
| 958288 | At2g36400 | AtGRF3    | unknown protein                                                                                                                                                   | 0.04877 | -0.20772 | 0.61984 | 1.61331 | 0.001358 |
| 942245 | At5g60850 | OBP4      | zinc finger protein OBP4 - like zinc finger protein OBP4, Arabidopsis thaliana, EMBL:AF155817;supported by full-length cDNA: Ceres:19080.                         | 0.05362 | -0.20716 | 0.62064 | 1.61123 | 0.006273 |
| 953484 | At3g02140 | TMAC2     | hypothetical protein predicted by genscan; supported by cDNA: gi_14334515_gb_AY034949.1_                                                                          | 0.05803 | -0.20576 | 0.62265 | 1.60605 | 0.019172 |
| 952654 | At3g15770 | 258262_at | hypothetical protein                                                                                                                                              | 0.04193 | -0.20547 | 0.62307 | 1.60496 | 9.04E-05 |
| 943196 | At5g49700 | 248564_at | putative protein contains similarity to AT-hook DNA-binding protein                                                                                               | 0.04041 | -0.20511 | 0.62358 | 1.60364 | 3.82E-05 |
| 958782 | At1g11960 | 264389_at | unknown protein similar to hypothetical protein HYP1 gb Z97338 from A. thaliana                                                                                   | 0.04929 | -0.20428 | 0.62477 | 1.60058 | 0.00195  |

|        |           |           |                                                                                                                                                                                                                            |         |          |         |         |          |
|--------|-----------|-----------|----------------------------------------------------------------------------------------------------------------------------------------------------------------------------------------------------------------------------|---------|----------|---------|---------|----------|
| 953498 | At3g01490 | 259163_at | putative protein kinase similar to ATMRK1, an Arabidopsis protein kinase related to mammal mixed-lineage kinases and Raf protein kinases GB:BAA22079 [Arabidopsis thaliana]; supported by cDNA: gi_16323086_gb_AY057647.1_ | 0.04981 | -0.20306 | 0.62653 | 1.59609 | 0.003082 |
| 954685 | At1g80280 | 260297_at | unknown protein contains Pfam profile: PF00561 alpha/beta hydrolase fold                                                                                                                                                   | 0.02754 | -0.20212 | 0.62788 | 1.59267 | 4.56E-11 |
| 958527 | At1g65310 | XTH17     | xyloglucan endotransglycosylase, putative similar to xyloglucan endotransglycosylase 1 GI:3901012 from [Fagus sylvatica]                                                                                                   | 0.04653 | -0.20185 | 0.62828 | 1.59165 | 0.000711 |
| 958308 | At2g21050 | 264025_at | AUX1-like amino acid permease ; supported by cDNA: gi_15451207_gb_AY054684.1_                                                                                                                                              | 0.03715 | -0.20101 | 0.62949 | 1.58858 | 7.31E-06 |
| 954905 | At2g41820 | 260494_at | putative receptor-like protein kinase                                                                                                                                                                                      | 0.05111 | -0.20085 | 0.62973 | 1.58799 | 0.005184 |
| 942229 | At5g60680 | 247585_at | putative protein predicted proteins, Arabidopsis thaliana;supported by full-length cDNA: Ceres:16638.                                                                                                                      | 0.03353 | -0.20038 | 0.6304  | 1.58629 | 3.36E-07 |
| 962099 | At5g10695 | 246018_at | Expressed protein ; supported by full-length cDNA: Ceres: 103171.                                                                                                                                                          | 0.03985 | -0.19962 | 0.63151 | 1.58349 | 5.34E-05 |
| 963940 | At2g45210 | 245136_at | putative auxin-regulated protein                                                                                                                                                                                           | 0.05036 | -0.19926 | 0.63203 | 1.58221 | 0.004655 |
| 950269 | At4g00820 | iqd17     | hypothetical protein                                                                                                                                                                                                       | 0.03991 | -0.19925 | 0.63205 | 1.58216 | 5.79E-05 |
| 946262 | At3g57450 | 251640_at | putative protein ;supported by full-length cDNA: Ceres:12522.                                                                                                                                                              | 0.03679 | -0.19494 | 0.63836 | 1.56652 | 1.32E-05 |
| 960126 | At2g01150 | RHA2B     | RING-H2 finger protein RHA2b identical to GP AF078823; supported by cDNA: gi_3790570_gb_AF078823.1_AF078823                                                                                                                | 0.04163 | -0.19458 | 0.63888 | 1.56525 | 2.53E-04 |
| 953752 | At1g13260 | RAV1      | DNA-binding protein RAV1 identical to RAV1 GI:3868857 from [Arabidopsis thaliana]; supported by cDNA: gi_3868856_dbj_AB013886.1_AB013886                                                                                   | 0.03689 | -0.1942  | 0.63944 | 1.56386 | 1.56E-05 |
| 961280 | At2g32560 | 267116_at | unknown protein                                                                                                                                                                                                            | 0.05235 | -0.19384 | 0.63997 | 1.56258 | 0.011271 |
| 960621 | At2g46660 | CYP78A6   | putative cytochrome P450                                                                                                                                                                                                   | 0.04607 | -0.19245 | 0.64202 | 1.55759 | 0.00195  |
| 953164 | At3g04640 | 258792_at | hypothetical protein predicted by genefinder;supported by full-length cDNA: Ceres:8992.                                                                                                                                    | 0.05364 | -0.18853 | 0.64784 | 1.5436  | 0.021129 |
| 950547 | At1g22190 | 255926_at | AP2 domain containing protein RAP2, putative similar to AP2 domain containing protein RAP2.4 GI:2281633 from [Arabidopsis thaliana]; supported by cDNA: gi_15292782_gb_AY050825.1_                                         | 0.05036 | -0.18815 | 0.64841 | 1.54223 | 0.010319 |
| 956582 | At1g68560 | XYL1      | alpha-xylosidase precursor identical to alpha-xylosidase precursor GB:AAD05539 GI:4163997 from [Arabidopsis thaliana]; supported by cDNA: gi_15982750_gb_AY057482.1_                                                       | 0.0251  | -0.18794 | 0.64872 | 1.5415  | 1.56E-11 |
| 945894 | At3g62660 | GATL7     | putative protein glycosyl transferase IgtC - Neisseria gonorrhoeae, EMBL:AF208062                                                                                                                                          | 0.05252 | -0.18618 | 0.65136 | 1.53526 | 0.019172 |
| 942614 | At5g57100 | 247944_at | putative protein similar to unknown protein (gb AAF04433.1);supported by full-length cDNA: Ceres:156439.                                                                                                                   | 0.04718 | -0.18599 | 0.65164 | 1.5346  | 0.004655 |
| 943738 | At5g44250 | 249064_at | putative protein contains similarity to unknown protein (gb AAD17413.1);supported by full-length cDNA: Ceres:27195.                                                                                                        | 0.04153 | -0.18586 | 0.65185 | 1.53411 | 5.95E-04 |

|        |           |           |                                                                                                                                                                                    |         |          |         |         |          |
|--------|-----------|-----------|------------------------------------------------------------------------------------------------------------------------------------------------------------------------------------|---------|----------|---------|---------|----------|
| 950629 | At1g58340 | ZF14      | unknown protein contains Pfam profile: PF01554 uncharacterized membrane protein family UPF0013; supported by cDNA: gi_6520160_dbj_AB028198.1_AB028198                              | 0.04402 | -0.18506 | 0.65304 | 1.53131 | 0.00195  |
| 942108 | At5g62220 | 247470_at | putative protein various predicted proteins, Arabidopsis thaliana                                                                                                                  | 0.03799 | -0.18479 | 0.65345 | 1.53034 | 1.06E-04 |
| 944619 | At5g19120 | 249923_at | conglutin gamma - like protein conglutin gamma precursor, Lupinus angustifolius, PIR:S21426; supported by cDNA: gi_15010797_gb_AY045700.1_                                         | 0.05643 | -0.18446 | 0.65394 | 1.52919 | 0.046219 |
| 946165 | At3g58620 | TTL4      | putative protein At2g42580 - Arabidopsis thaliana, EMBL:AC007087                                                                                                                   | 0.03975 | -0.18028 | 0.66026 | 1.51455 | 4.59E-04 |
| 942603 | At5g56980 | 247933_at | putative protein non-consensus CG donor splice site at exon 1, GA donor splice site at exon 3, similar to unknown protein (pir T04268);supported by full-length cDNA: Ceres:32257. | 0.04376 | -0.17961 | 0.66128 | 1.51222 | 0.002549 |
| 948150 | At4g31390 | 253517_at | predicted protein hypothetical protein slr1919, Synechocystis sp., PIR2:S75233                                                                                                     | 0.04301 | -0.17916 | 0.66197 | 1.51065 | 0.00195  |
| 952225 | At3g12920 | 257858_at | hypothetical protein predicted by genefinder;supported by full-length cDNA: Ceres:924.                                                                                             | 0.03524 | -0.17887 | 0.66242 | 1.50961 | 3.82E-05 |
| 947223 | At3g45780 | PHOT1     | nonphototropic hypocotyl 1 ; supported by cDNA: gi_14532875_gb_AY040062.1_                                                                                                         | 0.0276  | -0.17867 | 0.66272 | 1.50892 | 1.58E-08 |
| 954470 | At1g78100 | 260058_at | unknown protein ; supported by cDNA: gi_15450975_gb_AY054568.1_                                                                                                                    | 0.03554 | -0.17724 | 0.66491 | 1.50397 | 5.92E-05 |

**Table S3.** List of shade- regulated and IAA-, BL- and GA-regulated genes.

| <b>Class SD and SU</b>          |                                                                                                                                                                                                                                                                                                                                                                                                                                                                                                                                      |                                                     |
|---------------------------------|--------------------------------------------------------------------------------------------------------------------------------------------------------------------------------------------------------------------------------------------------------------------------------------------------------------------------------------------------------------------------------------------------------------------------------------------------------------------------------------------------------------------------------------|-----------------------------------------------------|
| <b>Class SD, Down-regulated</b> |                                                                                                                                                                                                                                                                                                                                                                                                                                                                                                                                      |                                                     |
| <b>Accession #</b>              | <b>Sequence Description</b>                                                                                                                                                                                                                                                                                                                                                                                                                                                                                                          | <b>Primary Gene Symbol</b>                          |
| At3g44450                       | Unknown protein.                                                                                                                                                                                                                                                                                                                                                                                                                                                                                                                     | -                                                   |
| At1g70560                       | TAA1/SAV3 is involved in the shade-induced production of indole-3-pyruvate (IPA), a precursor to IAA, a biologically active auxin. It is also involved in regulating many aspects of plant growth and development from embryogenesis to flower formation and plays a role in ethylene-mediated signaling. This enzyme can catalyze the formation of IPA from L-tryptophan. Though L-Trp is expected to be the preferred substrate in vivo, TAA1 also acts as an aminotransferase using L-Phe, L-Tyr, L-Leu, L-Ala, L-Met, and L-Gln. | TRYPTOPHAN AMINOTRANSFERASE OF ARABIDOPSIS 1 (TAA1) |
| At5g41410                       | Homeodomain protein required for ovule identity. Loss of function mutations show homeotic conversion of integuments to carpels. Forms heterodimers with STM and KNAT1. Interacts with AG-SEP heterodimers is thought to restrict WUS expression. BEL interacts with MADS box dimers composed of SEP1 (or SEP3) and AG, SHP1, SHP2 and STK. The interaction of BEL1 with AG-SEP3 is required for proper integument development and specification of integument identity.                                                              | BELL 1 (BEL1)                                       |
| At3g47420                       | Encodes a Pi starvation-responsive protein AtPS3. A member of the phosphate starvation-induced glycerol-3-phosphate permease gene family.                                                                                                                                                                                                                                                                                                                                                                                            | GLYCEROL-3-PHOSPHATE PERMEASE 1 (G3Pp1)             |
| At1g51805                       | Leucine-rich repeat protein kinase family protein.                                                                                                                                                                                                                                                                                                                                                                                                                                                                                   | -                                                   |
| At1g74940                       | Protein of unknown function (DUF581).                                                                                                                                                                                                                                                                                                                                                                                                                                                                                                | -                                                   |
| At3g44990                       | xyloglucan endo-transglycosylase                                                                                                                                                                                                                                                                                                                                                                                                                                                                                                     | XYLOGLUCAN ENDO-TRANSGLYCOSYLASE-RELATED 8 (XTR8)   |
| At2g15050                       | Predicted to encode a PR (pathogenesis-related) protein. Belongs to the lipid transfer protein (LTP) family.                                                                                                                                                                                                                                                                                                                                                                                                                         | LIPID TRANSFER PROTEIN 7 (LTP7)                     |
| At4g24780                       | Pectin lyase-like superfamily protein.                                                                                                                                                                                                                                                                                                                                                                                                                                                                                               | -                                                   |
| At4g21990                       | Encodes a protein disulfide isomerase-like (PDIL) protein, a member of a multigene family within the thioredoxin (TRX) superfamily. This protein also belongs to the adenosine 5'-phosphosulfate reductase-like (APRL) group.                                                                                                                                                                                                                                                                                                        | APS REDUCTASE 3 (APR3)                              |
| At1g75710                       | C2H2-like zinc finger protein.                                                                                                                                                                                                                                                                                                                                                                                                                                                                                                       | -                                                   |
|                                 |                                                                                                                                                                                                                                                                                                                                                                                                                                                                                                                                      |                                                     |
| <b>Class SU, Up-regulated</b>   |                                                                                                                                                                                                                                                                                                                                                                                                                                                                                                                                      |                                                     |
| <b>Accession #</b>              | <b>Sequence Description</b>                                                                                                                                                                                                                                                                                                                                                                                                                                                                                                          | <b>Primary Gene Symbol</b>                          |
| At1g68550                       | Encodes a member of the ERF (ethylene response factor) subfamily B-6 of ERF/AP2 transcription factor family.                                                                                                                                                                                                                                                                                                                                                                                                                         | CYTOKININ RESPONSE FACTOR 10 (CRF10)                |
| At3g58620                       | Encodes one of the 36 carboxylate clamp (CC)-tetratricopeptide repeat (TPR) proteins.                                                                                                                                                                                                                                                                                                                                                                                                                                                | TETRATRICOPETIDE-REPEAT THIOREDOXIN-LIKE 4 (TTL4)   |
| At3g13980                       | Unknown protein.                                                                                                                                                                                                                                                                                                                                                                                                                                                                                                                     | -                                                   |
| At5g06930                       | Unknown function.                                                                                                                                                                                                                                                                                                                                                                                                                                                                                                                    | -                                                   |
| At5g48900                       | Pectin lyase-like superfamily protein.                                                                                                                                                                                                                                                                                                                                                                                                                                                                                               | -                                                   |

|           |                                                                                                                                                                           |                                                                  |
|-----------|---------------------------------------------------------------------------------------------------------------------------------------------------------------------------|------------------------------------------------------------------|
| At3g57795 | -                                                                                                                                                                         | -                                                                |
| At4g32290 | Core-2/I-branching beta-1,6-N-acetylglucosaminyltransferase family protein.                                                                                               | -                                                                |
| At3g02170 | Encodes LONGIFOLIA2 (LNG2). Regulates leaf morphology by promoting cell expansion in the leaf-length direction. The LNG2 homologue LNG1 (At5g15580) has similar function. | LONGIFOLIA2 (LNG2)                                               |
| At4g28240 | Wound-responsive family protein.                                                                                                                                          | -                                                                |
| At3g17100 | Sequence-specific DNA binding transcription factors.                                                                                                                      | -                                                                |
| At3g54810 | Encodes a protein containing a GATA type zinc finger domain that is expressed in the embryo axis and involved in germination.                                             | BLUE MICROPYLAR END 3 (BME3)/GATA TRANSCRIPTION FACTOR 8 (GATA8) |
| At2g47440 | Tetratricopeptide repeat (TPR)-like superfamily protein.                                                                                                                  | -                                                                |
| At1g32920 | Unknown protein.                                                                                                                                                          | -                                                                |
| At1g54200 | Unknown protein.                                                                                                                                                          | -                                                                |
| At1g04240 | SHY2/IAA3 regulates multiple auxin responses in roots. It is induced rapidly by IAA, and has been shown to be phosphorylated by oat phytochrome A in vitro.               | SHORT HYPOCOTYL 2 (SHY2)                                         |
| At1g14920 | Repressor of GA responses and involved in gibberellic acid mediated signaling.                                                                                            | GIBBERELIC ACID INSENSITIVE (GAI)                                |
| At1g70940 | A regulator of auxin efflux and involved in differential growth.                                                                                                          | PIN-FORMED 3 (PIN3)                                              |
| At2g46310 | CRF5 encodes one of the six cytokinin response factors.                                                                                                                   | CYTOKININ RESPONSE FACTOR 5 (CRF5)                               |
| At3g58640 | Mitogen activated protein kinase kinase kinase-related.                                                                                                                   | -                                                                |
| At4g34760 | SAUR-like auxin-responsive protein family.                                                                                                                                | -                                                                |
| At1g29510 | SAUR-like auxin-responsive protein family.                                                                                                                                | SMALL AUXIN UPREGULATED 68 (SAUR68);                             |
| At1g21820 | -                                                                                                                                                                         | -                                                                |
| At2g40000 | Ortholog of sugar beet HS1 PRO-1 2 (HSPRO2).                                                                                                                              | ORTHOLOG OF SUGAR BEET HS1 PRO-1 2 (HSPRO2)                      |
| At4g27260 | Encodes an IAA-amido synthase that conjugates Asp and other amino acids to auxin in vitro.                                                                                | (WES1)                                                           |
| At1g01260 | Basic helix-loop-helix (bHLH) DNA-binding superfamily protein.                                                                                                            | -                                                                |
| At4g08950 | Unknown function.                                                                                                                                                         | EXORDIUM (EXO)                                                   |
| At2g39870 | Unknown protein.                                                                                                                                                          | -                                                                |
| At3g19680 | Protein of unknown function.                                                                                                                                              | -                                                                |
| At4g16770 | 2-oxoglutarate (2OG) and Fe(II)-dependent oxygenase superfamily protein.                                                                                                  | -                                                                |
| At3g58120 | Encodes a member of the BZIP family of transcription factors.                                                                                                             | (BZIP61)                                                         |
| At4g11280 | Encodes a member of the 1-aminocyclopropane-1-carboxylate (ACC) synthase gene family.                                                                                     | 1-AMINOCYCLOPROPANE-1-CARBOXYLIC ACID (ACC) SYNTHASE 6 (ACS6)    |
| At4g25260 | Plant invertase/pectin methylesterase inhibitor superfamily protein.                                                                                                      | -                                                                |
| At1g09250 | Basic helix-loop-helix (bHLH) DNA-binding superfamily protein.                                                                                                            | -                                                                |

|           |                                                                                                                                |                                                              |
|-----------|--------------------------------------------------------------------------------------------------------------------------------|--------------------------------------------------------------|
| At1g21910 | Encodes a member of the DREB subfamily A-5 of ERF/AP2 transcription factor family.                                             | DEHYDRATION RESPONSE ELEMENT-BINDING PROTEIN 26 (DREB26)     |
| At1g29430 | SAUR-like auxin-responsive protein family.                                                                                     | -                                                            |
| At4g13260 | Encodes YUC2. Catalyzes conversion of IPA (indole-3-pyruvic acid) to IAA (indole-3-acetic acid) in auxin biosynthesis pathway. | YUCCA2 (YUC2)                                                |
| At4g16515 | Encodes a root meristem growth factor (RGF).                                                                                   | ROOT MERISTEM GROWTH FACTOR 6 (RGF6)                         |
| At2g18790 | Red/far-red photoreceptor involved in the regulation of de-etiolation.                                                         | PHYTOCHROME B (PHYB)                                         |
| At5g08130 | Arabidopsis thaliana basic helix-loop-helix (bHLH) family protein involved in brassinosteroid signaling.                       | (BIM1)                                                       |
| At4g38400 | Member of EXPANSIN-LIKE.                                                                                                       | EXPANSIN-LIKE A2 (EXLA2)                                     |
| At1g29450 | SAUR-like auxin-responsive protein family.                                                                                     | -                                                            |
| At1g29500 | SAUR-like auxin-responsive protein family.                                                                                     | -                                                            |
| At1g21050 | Protein of unknown function.                                                                                                   | -                                                            |
| At1g02660 | Alpha/beta-Hydrolases superfamily protein.                                                                                     | -                                                            |
| At4g01250 | AtWRKY22 is a member of WRKY Transcription Factor.                                                                             | (WRKY22)                                                     |
| At3g23030 | Auxin inducible gene expressed in the nucleus.                                                                                 | INDOLE-3-ACETIC ACID INDUCIBLE 2 (IAA2)                      |
| At3g29575 | ABI five binding protein 3 (AFP3).                                                                                             | ABI FIVE BINDING PROTEIN 3 (AFP3)                            |
| At5g07000 | Encodes a member of the sulfotransferase family of proteins.                                                                   | SULFOTRANSFERASE 2B (ST2B)                                   |
| At1g29460 | SAUR-like auxin-responsive protein family.                                                                                     | -                                                            |
| At1g29440 | SAUR-like auxin-responsive protein family.                                                                                     | SMALL AUXIN UP RNA 63 (SAUR63)                               |
| At5g46240 | Encodes a potassium channel protein (KAT1).                                                                                    | POTASSIUM CHANNEL IN ARABIDOPSIS THALIANA 1 (KAT1)           |
| At5g51190 | Encodes a member of the ERF (ethylene response factor) subfamily B-3 of ERF/AP2 transcription factor family.                   | -                                                            |
| At4g34770 | SAUR-like auxin-responsive protein family.                                                                                     | -                                                            |
| At2g42380 | Encodes a member of the BZIP family of transcription factors.                                                                  | Encodes a member of the BZIP family of transcription factors |
| At5g25190 | Encodes a member of the ERF (ethylene response factor) subfamily B-6 of ERF/AP2 transcription factor family.                   | ETHYLENE AND SALT INDUCIBLE 3 (ESE3)                         |
| At5g12050 | Unknown protein.                                                                                                               | -                                                            |
| At5g66590 | CAP (Cysteine-rich secretory proteins, Antigen 5, and Pathogenesis-related 1 protein) superfamily protein.                     | -                                                            |
| At3g50340 | Unknown protein.                                                                                                               | -                                                            |
| At5g44260 | Zinc finger C-x8-C-x5-C-x3-H type family protein.                                                                              | -                                                            |
| At5g62280 | Protein of unknown function.                                                                                                   | -                                                            |
| At3g03840 | SAUR-like auxin-responsive protein family.                                                                                     | SMALL AUXIN UP RNA 27 (SAUR27)                               |

|           |                                                                                                                                                                      |                                                                                                                 |
|-----------|----------------------------------------------------------------------------------------------------------------------------------------------------------------------|-----------------------------------------------------------------------------------------------------------------|
| At5g02760 | Protein phosphatase 2C family protein.                                                                                                                               | -                                                                                                               |
| At5g43890 | Encodes a YUCCA-like putative flavin monooxygenase.                                                                                                                  | YUCCA 5 (YUC5)                                                                                                  |
| At4g27280 | Calcium-binding EF-hand family protein.                                                                                                                              | -                                                                                                               |
| At5g52900 | Encodes a member of the MAKR (MEMBRANE-ASSOCIATED KINASE REGULATOR) gene family.                                                                                     | MEMBRANE-ASSOCIATED KINASE REGULATOR 6 (MAKR6)                                                                  |
| At5g18060 | SAUR-like auxin-responsive protein family.                                                                                                                           | SMALL AUXIN UP RNA 23 (SAUR23)                                                                                  |
| At5g47370 | Homeobox-leucine zipper genes induced by auxin, but not by other phytohormones.                                                                                      | HAT2                                                                                                            |
| At5g57560 | Encodes a cell wall-modifying enzyme.                                                                                                                                | TOUCH 4 (TCH4)                                                                                                  |
| At1g35140 | Involved in the C-starvation response.                                                                                                                               | PHOSPHATE-INDUCED 1 (PHI-1)                                                                                     |
| At2g44910 | Encodes a homeodomain protein whose expression displays a dependence on phyB for both red and far-red light response. Also involved in the shade avoidance syndrome. | ARABIDOPSIS THALIANA HOMEODOMAIN-LEUCINE ZIPPER PROTEIN 4 (ATHB-4)                                              |
| At1g02340 | Encodes a light-inducible, nuclear bHLH protein involved in phytochrome signaling.                                                                                   | LONG HYPOCOTYL IN FAR-RED (HFR1)                                                                                |
| At4g28720 | Auxin biosynthetic gene.                                                                                                                                             | YUCCA 8 (YUC8)                                                                                                  |
| At1g75450 | CKX5 (it used to be called AtCKX6) encodes a protein whose sequence is similar to cytokinin oxidase/dehydrogenase, which catalyzes the degradation of cytokinins.    | CYTOKININ OXIDASE 5 (CKX5)                                                                                      |
| At3g15540 | Primary auxin-responsive gene.                                                                                                                                       | INDOLE-3-ACETIC ACID INDUCIBLE 19 (IAA19)                                                                       |
| At3g03830 | SAUR-like auxin-responsive protein family.                                                                                                                           | SMALL AUXIN UP RNA 28 (SAUR28)                                                                                  |
| At5g07010 | Encodes a sulfotransferase that acts specifically on 11- and 12-hydroxyjasmonic acid.                                                                                | SULFOTRANSFERASE 2A (ST2A)                                                                                      |
| At4g32280 | Auxin inducible protein.                                                                                                                                             | INDOLE-3-ACETIC ACID INDUCIBLE 29 (IAA29)                                                                       |
| At2g42870 | Encodes PHYTOCHROME RAPIDLY REGULATED1 (PAR1), an atypical basic helix-loop-helix (bHLH) protein.                                                                    | PHY RAPIDLY REGULATED 1 (PAR1)                                                                                  |
| At4g16780 | Encodes a homeodomain-leucine zipper protein that is rapidly and strongly induced by changes in the ratio of red to far-red light.                                   | ARABIDOPSIS THALIANA HOMEODOMAIN-LEUCINE ZIPPER PROTEIN 4 (ATHB-4) / HOMEODOMAIN-LEUCINE ZIPPER PROTEIN 4 (HB4) |
| At1g04180 | Auxin biosynthetic gene.                                                                                                                                             | YUCCA 9 (YUC9)                                                                                                  |
| At4g37770 | Encodes an auxin inducible ACC synthase.                                                                                                                             | 1-AMINO-CYCLOPROPANE-1-CARBOXYLATE SYNTHASE 8 (ACS8)                                                            |

**Class S+A, shade-regulated genes (in both Col-0 and sav3 seedlings) and IAA-regulated genes.**



| Shade down-regulated + IAA up-regulated   |                                                                                                                                                                                                                                                                                                                                                                                                 |                                                               |
|-------------------------------------------|-------------------------------------------------------------------------------------------------------------------------------------------------------------------------------------------------------------------------------------------------------------------------------------------------------------------------------------------------------------------------------------------------|---------------------------------------------------------------|
| Accession #                               | Sequence Description                                                                                                                                                                                                                                                                                                                                                                            | Primary Gene Symbol                                           |
| Shade down-regulated + IAA down-regulated |                                                                                                                                                                                                                                                                                                                                                                                                 |                                                               |
| Accession #                               | Sequence Description                                                                                                                                                                                                                                                                                                                                                                            | Primary Gene Symbol                                           |
| At2g15050                                 | Predicted to encode a PR (pathogenesis-related) protein. Belongs to the lipid transfer protein (PR-14) family with the following members: At2g38540/LTP1, At2g38530/LTP2, At5g59320/LTP3, At5g59310/LTP4, At3g51600/LTP5, At3g08770/LTP6, At2g15050/LTP7, At2g18370/LTP8, At2g15325/LTP9, At5g01870/LTP10, At4g33355/LTP11, At3g51590/LTP12, At5g44265/LTP13, At5g62065/LTP14, At4g08530/LTP15. | LTP7                                                          |
| Shade up-regulated + IAA up-regulated     |                                                                                                                                                                                                                                                                                                                                                                                                 |                                                               |
| Accession #                               | Sequence Description                                                                                                                                                                                                                                                                                                                                                                            | Primary Gene Symbol                                           |
| At5g06930                                 | Unknown protein.                                                                                                                                                                                                                                                                                                                                                                                | -                                                             |
| At3g02170                                 | Encodes LONGIFOLIA2 (LNG2). Regulates leaf morphology by promoting cell expansion in the leaf-length direction. The LNG2 homologue LNG1 (At5g15580) has similar function.                                                                                                                                                                                                                       | LONGIFOLIA2 (LNG2)                                            |
| At1g32920                                 | Unknown protein.                                                                                                                                                                                                                                                                                                                                                                                | -                                                             |
| At1g54200                                 | Unknown protein.                                                                                                                                                                                                                                                                                                                                                                                | -                                                             |
| At1g04240                                 | SHY2/IAA3 regulates multiple auxin responses in roots. It is induced rapidly by IAA, and has been shown to be phosphorylated by oat phytochrome A in vitro.                                                                                                                                                                                                                                     | SHORT HYPOCOTYL 2 (SHY2)                                      |
| At1g70940                                 | A regulator of auxin efflux and involved in differential growth.                                                                                                                                                                                                                                                                                                                                | PIN-FORMED 3 (PIN3)                                           |
| At4g34760                                 | SAUR-like auxin-responsive protein family.                                                                                                                                                                                                                                                                                                                                                      | -                                                             |
| At1g29510                                 | SAUR-like auxin-responsive protein family.                                                                                                                                                                                                                                                                                                                                                      | SMALL AUXIN UPREGULATED 68 (SAUR68);                          |
| At1g21820                                 | -                                                                                                                                                                                                                                                                                                                                                                                               | -                                                             |
| At4g27260                                 | Encodes an IAA-amido synthase that conjugates Asp and other amino acids to auxin in vitro. Lines carrying insertions in this gene are hypersensitive to auxin. It is involved in camalexin biosynthesis via conjugating indole-3-carboxylic acid (ICA) and cysteine (Cys).                                                                                                                      | WES1                                                          |
| At4g08950                                 | Unknown function.                                                                                                                                                                                                                                                                                                                                                                               | EXORDIUM (EXO)                                                |
| At2g39870                                 | Unknown protein.                                                                                                                                                                                                                                                                                                                                                                                | -                                                             |
| At3g58120                                 | Encodes a member of the BZIP family of transcription factors.                                                                                                                                                                                                                                                                                                                                   | BZIP61                                                        |
| At4g11280                                 | Encodes a member of the 1-aminocyclopropane-1-carboxylate (ACC) synthase (S-adenosyl-L-methionine methylthioadenosine-lyase, EC 4.4.1.14) gene family.                                                                                                                                                                                                                                          | 1-AMINOCYCLOPROPANE-1-CARBOXYLIC ACID (ACC) SYNTHASE 6 (ACS6) |
| At1g09250                                 | basic helix-loop-helix (bHLH) DNA-binding superfamily protein.                                                                                                                                                                                                                                                                                                                                  | -                                                             |
| At1g29430                                 | SAUR-like auxin-responsive protein family.                                                                                                                                                                                                                                                                                                                                                      | -                                                             |
| At4g16515                                 | Encodes a root meristem growth factor (RGF).                                                                                                                                                                                                                                                                                                                                                    | ROOT MERISTEM GROWTH FACTOR 6 (RGF6)                          |
| At1g29450                                 | SAUR-like auxin-responsive protein family.                                                                                                                                                                                                                                                                                                                                                      | -                                                             |

|                                                |                                                                                                              |                                                             |
|------------------------------------------------|--------------------------------------------------------------------------------------------------------------|-------------------------------------------------------------|
| At1g29500                                      | SAUR-like auxin-responsive protein family.                                                                   | -                                                           |
| At1g21050                                      | Protein of unknown function.                                                                                 | -                                                           |
| At1g02660                                      | Alpha/beta-Hydrolases superfamily protein.                                                                   | -                                                           |
| At3g23030                                      | Auxin inducible gene.                                                                                        | INDOLE-3-ACETIC ACID<br>INDUCIBLE 2 (IAA2)                  |
| At1g29460                                      | SAUR-like auxin-responsive protein family.                                                                   | -                                                           |
| At1g29440                                      | SAUR-like auxin-responsive protein family.                                                                   | SMALL AUXIN UP RNA 63<br>(SAUR63)                           |
| At5g51190                                      | Encodes a member of the ERF (ethylene response factor) subfamily B-3 of ERF/AP2 transcription factor family. | -                                                           |
| At4g34770                                      | SAUR-like auxin-responsive protein family.                                                                   | -                                                           |
| At5g25190                                      | Encodes a member of the ERF (ethylene response factor) subfamily B-6 of ERF/AP2 transcription factor family. | ETHYLENE AND SALT<br>INDUCIBLE 3 (ESE3)                     |
| At5g12050                                      | Unknown protein.                                                                                             | -                                                           |
| At3g50340                                      | Unknown protein.                                                                                             | -                                                           |
| At5g44260                                      | Zinc finger C-x8-C-x5-C-x3-H type family protein.                                                            | -                                                           |
| At5g62280                                      | Protein of unknown function.                                                                                 | -                                                           |
| At3g03840                                      | SAUR-like auxin-responsive protein family.                                                                   | SMALL AUXIN UP RNA 27<br>(SAUR27)                           |
| At5g02760                                      | Protein phosphatase 2C family protein.                                                                       | -                                                           |
| At4g27280                                      | Calcium-binding EF-hand family protein.                                                                      | -                                                           |
| At5g52900                                      | Encodes a member of the MAKR (MEMBRANE-ASSOCIATED KINASE REGULATOR) gene family.                             | MEMBRANE-ASSOCIATED<br>KINASE REGULATOR 6<br>(MAKR6)        |
| At5g18060                                      | SAUR-like auxin-responsive protein family.                                                                   | SMALL AUXIN UP RNA 23<br>(SAUR23)                           |
| At5g47370                                      | homeobox-leucine zipper genes induced by auxin, but not by other phytohormones.                              | HAT2                                                        |
| At5g57560                                      | Encodes a cell wall-modifying enzyme.                                                                        | TOUCH 4 (TCH4)                                              |
| At1g35140                                      | Involved in the C-starvation response.                                                                       | PHOSPHATE-INDUCED 1 (PHI-<br>1)                             |
| At3g15540                                      | Primary auxin-responsive gene.                                                                               | INDOLE-3-ACETIC ACID<br>INDUCIBLE 19 (IAA19)                |
| At3g03830                                      | SAUR-like auxin-responsive protein family.                                                                   | SMALL AUXIN UP RNA 28<br>(SAUR28)                           |
| At4g32280                                      | Auxin inducible protein.                                                                                     | INDOLE-3-ACETIC ACID<br>INDUCIBLE 29 (IAA29)                |
| At4g37770                                      | Encodes an auxin inducible ACC synthase.                                                                     | 1-AMINO-CYCLOPROPANE-1-<br>CARBOXYLATE SYNTHASE 8<br>(ACS8) |
| <b>Shade up-regulated + IAA down-regulated</b> |                                                                                                              |                                                             |
| <b>Accession #</b>                             | <b>Sequence Description</b>                                                                                  | <b>Primary Gene Symbol</b>                                  |

**Class S+B, shade-regulated genes (in both Col-0 and sav3 seedlings) and BL-regulated genes.**

| <b>Shade down-regulated + BL up-regulated</b>   |                                                                                                                                                                           |                                                                  |
|-------------------------------------------------|---------------------------------------------------------------------------------------------------------------------------------------------------------------------------|------------------------------------------------------------------|
| <b>Accession #</b>                              | <b>Sequence Description</b>                                                                                                                                               | <b>Primary Gene Symbol</b>                                       |
|                                                 |                                                                                                                                                                           |                                                                  |
| <b>Shade down-regulated + BL down-regulated</b> |                                                                                                                                                                           |                                                                  |
| <b>Accession #</b>                              | <b>Sequence Description</b>                                                                                                                                               | <b>Primary Gene Symbol</b>                                       |
|                                                 |                                                                                                                                                                           |                                                                  |
| <b>Shade up-regulated + BL up-regulated</b>     |                                                                                                                                                                           |                                                                  |
| <b>Accession #</b>                              | <b>Sequence Description</b>                                                                                                                                               | <b>Primary Gene Symbol</b>                                       |
| At3g58620                                       | Encodes one of the 36 carboxylate clamp (CC)-tetratricopeptide repeat (TPR) proteins                                                                                      | TETRATRICOPETIDE-REPEAT THIOREDOXIN-LIKE 4 (TTL4)                |
| At3g02170                                       | Encodes LONGIFOLIA2 (LNG2). Regulates leaf morphology by promoting cell expansion in the leaf-length direction. The LNG2 homologue LNG1 (At5g15580) has similar function. | LONGIFOLIA2 (LNG2)                                               |
| At3g54810                                       | Encodes a protein containing a GATA type zinc finger domain that is expressed in the embryo axis and involved in germination                                              | BLUE MICROPYLAR END 3 (BME3)/GATA TRANSCRIPTION FACTOR 8 (GATA8) |
| At1g32920                                       | unknown protein                                                                                                                                                           |                                                                  |
| At1g04240                                       | SHY2/IAA3 regulates multiple auxin responses in roots                                                                                                                     | INDOLE-3-ACETIC ACID INDUCIBLE 3 (IAA3)/SHORT HYOCOTYL 2 (SHY2)  |
| At1g29510                                       | SAUR-like auxin-responsive protein family.                                                                                                                                | SMALL AUXIN UPREGULATED 68 (SAUR68);                             |
| At1g21820                                       | -                                                                                                                                                                         | -                                                                |
| At4g08950                                       | Unknown function.                                                                                                                                                         | EXORDIUM (EXO)                                                   |
| At4g11280                                       | encodes a member of the 1-aminocyclopropane-1-carboxylate (ACC) synthase gene family.                                                                                     | 1-AMINOCYCLOPROPANE-1-CARBOXYLIC ACID (ACC) SYNTHASE 6 (ACS6)    |
| At1g21910                                       | encodes a member of the DREB subfamily A-5 of ERF/AP2 transcription factor family.                                                                                        | DEHYDRATION RESPONSE ELEMENT-BINDING PROTEIN 26 (DREB26)         |
| At1g29430                                       | SAUR-like auxin-responsive protein family.                                                                                                                                | -                                                                |
| At4g16515                                       | Encodes a root meristem growth factor (RGF).                                                                                                                              | ROOT MERISTEM GROWTH FACTOR 6 (RGF6)                             |
| At1g29450                                       | SAUR-like auxin-responsive protein family.                                                                                                                                | -                                                                |
| At1g29500                                       | SAUR-like auxin-responsive protein family.                                                                                                                                | -                                                                |
| At1g29460                                       | SAUR-like auxin-responsive protein family.                                                                                                                                | -                                                                |
| At1g29440                                       | SAUR-like auxin-responsive protein family                                                                                                                                 | SMALL AUXIN UP RNA 63                                            |

|                                               |                                                                                                                                                                                                                                                                            |                                                |
|-----------------------------------------------|----------------------------------------------------------------------------------------------------------------------------------------------------------------------------------------------------------------------------------------------------------------------------|------------------------------------------------|
|                                               |                                                                                                                                                                                                                                                                            | (SAUR63)                                       |
| At5g25190                                     | encodes a member of the ERF (ethylene response factor) subfamily B-6 of ERF/AP2 transcription factor family.                                                                                                                                                               | ETHYLENE AND SALT INDUCIBLE 3 (ESE3)           |
| At4g27280                                     | Calcium-binding EF-hand family protein                                                                                                                                                                                                                                     | -                                              |
| At5g52900                                     | Encodes a member of the MAKR (MEMBRANE-ASSOCIATED KINASE REGULATOR) gene family                                                                                                                                                                                            | MEMBRANE-ASSOCIATED KINASE REGULATOR 6 (MAKR6) |
| At5g57560                                     | Encodes a cell wall-modifying enzyme.                                                                                                                                                                                                                                      | TOUCH 4 (TCH4)                                 |
| At1g35140                                     | Involved in the C-starvation response.                                                                                                                                                                                                                                     | PHOSPHATE-INDUCED 1 (PHI-1)                    |
| At3g03830                                     | SAUR-like auxin-responsive protein family                                                                                                                                                                                                                                  | SMALL AUXIN UP RNA 28 (SAUR28)                 |
| <b>Shade up-regulated + BL down-regulated</b> |                                                                                                                                                                                                                                                                            |                                                |
| <b>Accession #</b>                            | <b>Sequence Description</b>                                                                                                                                                                                                                                                | <b>Primary Gene Symbol</b>                     |
| At4g32290                                     | Core-2/l-branching beta-1,6-N-acetylglucosaminyltransferase family protein.                                                                                                                                                                                                | -                                              |
| At4g28240                                     | Wound-responsive family protein.                                                                                                                                                                                                                                           | -                                              |
| At4g27260                                     | Encodes an IAA-amido synthase that conjugates Asp and other amino acids to auxin in vitro. Lines carrying insertions in this gene are hypersensitive to auxin. It is involved in camalexin biosynthesis via conjugating indole-3-carboxylic acid (ICA) and cysteine (Cys). | WES1                                           |
| At3g19680                                     | Protein of unknown function.                                                                                                                                                                                                                                               | -                                              |
| At2g18790                                     | Red/far-red photoreceptor involved in the regulation of de-etiolation.                                                                                                                                                                                                     | PHYTOCHROME B (PHYB)                           |
| At1g21050                                     | Protein of unknown function.                                                                                                                                                                                                                                               | -                                              |
| At3g23030                                     | Auxin inducible gene expressed in the nucleus.                                                                                                                                                                                                                             | INDOLE-3-ACETIC ACID INDUCIBLE 2 (IAA2)        |
| At5g12050                                     | Unknown protein.                                                                                                                                                                                                                                                           | -                                              |
| At5g66590                                     | CAP (Cysteine-rich secretory proteins, Antigen 5, and Pathogenesis-related 1 protein) superfamily protein.                                                                                                                                                                 | -                                              |

|                                                                                                    |                             |                            |
|----------------------------------------------------------------------------------------------------|-----------------------------|----------------------------|
| <b>Class S+G, shade-regulated genes (in both Col-0 and sav3 seedlings) and GA-regulated genes.</b> |                             |                            |
| <b>Shade down-regulated + GA up-regulated</b>                                                      |                             |                            |
| <b>Accession #</b>                                                                                 | <b>Sequence Description</b> | <b>Primary Gene Symbol</b> |
|                                                                                                    |                             |                            |
| <b>Shade down-regulated + GA down-regulated</b>                                                    |                             |                            |
| <b>Accession #</b>                                                                                 | <b>Sequence Description</b> | <b>Primary Gene Symbol</b> |
|                                                                                                    |                             |                            |

| Shade up-regulated + GA up-regulated   |                                                                                                                                                                           |                     |
|----------------------------------------|---------------------------------------------------------------------------------------------------------------------------------------------------------------------------|---------------------|
| Accession #                            | Sequence Description                                                                                                                                                      | Primary Gene Symbol |
| At3g57795                              | -                                                                                                                                                                         | -                   |
| At3g02170                              | Encodes LONGIFOLIA2 (LNG2). Regulates leaf morphology by promoting cell expansion in the leaf-length direction. The LNG2 homologue LNG1 (At5g15580) has similar function. | LONGIFOLIA2 (LNG2)  |
| Shade up-regulated + GA down-regulated |                                                                                                                                                                           |                     |
| Accession #                            | Sequence Description                                                                                                                                                      | Primary Gene Symbol |
| At1g54200                              | Unknown protein                                                                                                                                                           | -                   |

**Table S4.** ANOVA table for experiments shown in Figure 4. DF, Degrees of Freedom; SS, Sum of Squares; MS; Mean Square.

HYP elongation in wt vs. *hfr1-5*

| Source of variation | DF  | SS      | MS      | F-value | p-value       |
|---------------------|-----|---------|---------|---------|---------------|
| Genotype            | 1   | 0.04678 | 0.04678 | 0.34    | 0.5604        |
| PIC                 | 2   | 92.75   | 46.38   | 337.56  | <0.0001       |
| Interaction         | 2   | 1.196   | 0.5978  | 4.35    | <b>0.0145</b> |
| Residual (error)    | 159 | 21.84   | 0.1374  | -       | -             |

HYP elongation in wt vs. *hfr1-5*

| Source of variation | DF  | SS     | MS     | F-value | p-value       |
|---------------------|-----|--------|--------|---------|---------------|
| Genotype            | 1   | 1.148  | 1.148  | 6.49    | 0.0117        |
| EBL                 | 2   | 104.1  | 202.5  | 1143.88 | <0.0001       |
| Interaction         | 2   | 0.3676 | 0.1838 | 1.04    | <b>0.3562</b> |
| Residual (error)    | 184 | 32.58  | 0.1771 | -       | -             |

HYP elongation in wt vs. G-BH.03

| Source of variation | DF  | SS    | MS      | F-value | p-value           |
|---------------------|-----|-------|---------|---------|-------------------|
| Genotype            | 1   | 40.47 | 40.47   | 466.90  | <0.0001           |
| PIC                 | 2   | 168.8 | 84.40   | 973.83  | <0.0001           |
| Interaction         | 2   | 8.625 | 4.312   | 49.76   | <b>&lt;0.0001</b> |
| Residual (error)    | 142 | 12.31 | 0.08667 | -       | -                 |

HYP elongation in wt vs. G-H.02

| Source of variation | DF  | SS    | MS     | F-value | p-value       |
|---------------------|-----|-------|--------|---------|---------------|
| Genotype            | 1   | 12.54 | 12.54  | 107.16  | <0.0001       |
| PIC                 | 2   | 210.3 | 105.1  | 898.63  | <0.0001       |
| Interaction         | 2   | 2.078 | 1.039  | 8.88    | <b>0.0002</b> |
| Residual (error)    | 141 | 16.50 | 0.1170 | -       | -             |

HYP elongation in wt vs. G-BH.03

| Source of variation | DF  | SS    | MS     | F-value | p-value           |
|---------------------|-----|-------|--------|---------|-------------------|
| Genotype            | 1   | 11.53 | 11.53  | 61.48   | <0.0001           |
| EBL                 | 2   | 288.1 | 144.1  | 767.90  | <0.0001           |
| Interaction         | 2   | 7.791 | 3.896  | 20.76   | <b>&lt;0.0001</b> |
| Residual (error)    | 149 | 27.96 | 0.1876 | -       | -                 |

HYP elongation in wt vs. G-H.02

| Source of variation | DF  | SS     | MS     | F-value | p-value       |
|---------------------|-----|--------|--------|---------|---------------|
| Genotype            | 1   | 7.651  | 7.651  | 54.48   | <0.0001       |
| EBL                 | 2   | 252.5  | 126.2  | 898.89  | <0.0001       |
| Interaction         | 2   | 0.8391 | 0.4196 | 2.99    | <b>0.0533</b> |
| Residual (error)    | 157 | 22.05  | 0.1404 | -       | -             |

**Table S5.** ANOVA table for experiments shown in Figure 5. DF, Degrees of Freedom; SS, Sum of Squares; MS; Mean Square.

HYP elongation in wt vs. PAR1-RNAi.06

| Source of variation | DF  | SS     | MS     | F-value | p-value       |
|---------------------|-----|--------|--------|---------|---------------|
| Genotype            | 1   | 6.718  | 6.718  | 63.67   | <0.0001       |
| PIC                 | 2   | 58.96  | 29.48  | 279.36  | <0.0001       |
| Interaction         | 2   | 0.3180 | 0.1590 | 1.51    | <b>0.2249</b> |
| Residual (error)    | 151 | 15.93  | 0.1055 | -       | -             |

HYP elongation in wt vs. PAR1-RNAi.06

| Source of variation | DF  | SS      | MS      | F-value | p-value       |
|---------------------|-----|---------|---------|---------|---------------|
| Genotype            | 1   | 0.02631 | 0.02631 | 0.25    | 0.6177        |
| EBL                 | 2   | 288.8   | 144.4   | 1373.92 | <0.0001       |
| Interaction         | 2   | 0.5986  | 0.2993  | 2.85    | <b>0.0617</b> |
| Residual (error)    | 128 | 13.46   | 0.1051  | -       | -             |

HYP elongation in wt vs. par2-1

| Source of variation | DF  | SS     | MS     | F-value | p-value       |
|---------------------|-----|--------|--------|---------|---------------|
| Genotype            | 1   | 6.426  | 6.426  | 31.82   | <0.0001       |
| PIC                 | 2   | 150.3  | 75.14  | 372.10  | <0.0001       |
| Interaction         | 2   | 0.3636 | 0.1818 | 0.90    | <b>0.4084</b> |
| Residual (error)    | 166 | 33.52  | 0.2019 | -       | -             |

HYP elongation in wt vs. par2-1

| Source of variation | DF  | SS     | MS     | F-value | p-value       |
|---------------------|-----|--------|--------|---------|---------------|
| Genotype            | 1   | 1.975  | 1.975  | 15.51   | 0.0001        |
| EBL                 | 2   | 492.3  | 246.1  | 1933.57 | <0.0001       |
| Interaction         | 2   | 0.3949 | 0.1974 | 1.55    | <b>0.2156</b> |
| Residual (error)    | 144 | 18.33  | 0.1273 | -       | -             |

HYP elongation in wt vs. PAR1-G.01

| Source of variation | DF  | SS    | MS     | F-value | p-value           |
|---------------------|-----|-------|--------|---------|-------------------|
| Genotype            | 1   | 29.83 | 29.83  | 218.14  | <0.0001           |
| PIC                 | 2   | 19.06 | 9.532  | 69.71   | <0.0001           |
| Interaction         | 2   | 12.71 | 6.356  | 46.48   | <b>&lt;0.0001</b> |
| Residual (error)    | 109 | 14.91 | 0.1367 | -       | -                 |

HYP elongation in wt vs. PAR1-GG.13

| Source of variation | DF   | SS    | MS     | F-value | p-value           |
|---------------------|------|-------|--------|---------|-------------------|
| Genotype            | 1    | 31.74 | 31.74  | 277.14  | <0.0001           |
| PIC                 | 2    | 16.36 | 8.181  | 71.43   | <0.0001           |
| Interaction         | 2    | 14.61 | 7.306  | 63.79   | <b>&lt;0.0001</b> |
| Residual (error)    | 97.0 | 11.11 | 0.1145 | -       | -                 |

HYP elongation in wt vs. PAR2.12

| Source of variation | DF  | SS    | MS     | F-value | p-value           |
|---------------------|-----|-------|--------|---------|-------------------|
| Genotype            | 1   | 47.58 | 47.58  | 465.09  | <0.0001           |
| PIC                 | 2   | 16.88 | 8.440  | 82.49   | <0.0001           |
| Interaction         | 2   | 13.41 | 6.704  | 65.52   | <b>&lt;0.0001</b> |
| Residual (error)    | 102 | 10.44 | 0.1023 | -       | -                 |

HYP elongation in wt vs. PAR2-G.03

| Source of variation | DF   | SS    | MS     | F-value | p-value           |
|---------------------|------|-------|--------|---------|-------------------|
| Genotype            | 1    | 51.23 | 51.23  | 503.31  | <0.0001           |
| PIC                 | 2    | 16.11 | 8.055  | 79.14   | <0.0001           |
| Interaction         | 2    | 14.24 | 7.118  | 69.93   | <b>&lt;0.0001</b> |
| Residual (error)    | 99.0 | 10.08 | 0.1018 | -       | -                 |

HYP elongation in wt vs. PAR1-G.01

| Source of variation | DF  | SS    | MS     | F-value | p-value           |
|---------------------|-----|-------|--------|---------|-------------------|
| Genotype            | 1   | 24.02 | 24.02  | 186.54  | <0.0001           |
| EBL                 | 2   | 274.4 | 137.2  | 1065.48 | <0.0001           |
| Interaction         | 2   | 3.250 | 1.625  | 12.62   | <b>&lt;0.0001</b> |
| Residual (error)    | 175 | 22.53 | 0.1288 | -       | -                 |

HYP elongation in wt vs. PAR1-GG.13

| Source of variation | DF  | SS     | MS     | F-value | p-value       |
|---------------------|-----|--------|--------|---------|---------------|
| Genotype            | 1   | 3.492  | 3.492  | 24.11   | <0.0001       |
| EBL                 | 2   | 350.0  | 175.0  | 1208.49 | <0.0001       |
| Interaction         | 2   | 0.2405 | 0.1202 | 0.83    | <b>0.4376</b> |
| Residual (error)    | 175 | 25.34  | 0.1448 | -       | -             |

HYP elongation in wt vs. PAR2.12

| Source of variation | DF  | SS    | MS     | F-value | p-value           |
|---------------------|-----|-------|--------|---------|-------------------|
| Genotype            | 1   | 29.47 | 29.47  | 222.19  | <0.0001           |
| EBL                 | 2   | 222.1 | 111.1  | 837.34  | <0.0001           |
| Interaction         | 2   | 12.63 | 6.315  | 47.62   | <b>&lt;0.0001</b> |
| Residual (error)    | 173 | 22.94 | 0.1326 | -       | -                 |

HYP elongation in wt vs. PAR2-G.03

| Source of variation | DF  | SS     | MS     | F-value | p-value       |
|---------------------|-----|--------|--------|---------|---------------|
| Genotype            | 1   | 9.605  | 9.605  | 65.66   | <0.0001       |
| EBL                 | 2   | 338.0  | 169.0  | 1155.24 | <0.0001       |
| Interaction         | 2   | 0.3971 | 0.1985 | 1.36    | <b>0.2601</b> |
| Residual (error)    | 174 | 25.45  | 0.1463 | -       | -             |



**Table S6.** ANOVA table for experiments shown in Figure 6. DF, Degrees of Freedom; SS, Sum of Squares; MS; Mean Square.

HYP elongation in wt vs. *bee123*

| Source of variation | DF  | SS    | MS      | F-value | p-value           |
|---------------------|-----|-------|---------|---------|-------------------|
| Genotype            | 1   | 5.186 | 5.186   | 54.33   | <0.0001           |
| PIC                 | 2   | 90.28 | 45.14   | 472.90  | <0.0001           |
| Interaction         | 2   | 2.027 | 1.014   | 10.62   | <b>&lt;0.0001</b> |
| Residual (error)    | 157 | 14.99 | 0.09545 | -       | -                 |

HYP elongation in wt vs. *bee123*

| Source of variation | DF  | SS    | MS     | F-value | p-value           |
|---------------------|-----|-------|--------|---------|-------------------|
| Genotype            | 1   | 20.51 | 20.51  | 123.16  | <0.0001           |
| EBL                 | 2   | 266.1 | 133.0  | 798.74  | <0.0001           |
| Interaction         | 2   | 7.443 | 3.721  | 123.16  | <b>&lt;0.0001</b> |
| Residual (error)    | 144 | 23.98 | 0.1666 | -       | -                 |

HYP elongation in wt vs. *bim123*

| Source of variation | DF  | SS    | MS     | F-value | p-value       |
|---------------------|-----|-------|--------|---------|---------------|
| Genotype            | 1   | 16.61 | 16.61  | 106.65  | <0.0001       |
| PIC                 | 2   | 101.2 | 50.58  | 324.70  | <0.0001       |
| Interaction         | 2   | 2.245 | 1.123  | 7.21    | <b>0.0010</b> |
| Residual (error)    | 171 | 26.64 | 0.1558 | -       | -             |

HYP elongation in wt vs. *bim123*

| Source of variation | DF  | SS    | MS     | F-value | p-value           |
|---------------------|-----|-------|--------|---------|-------------------|
| Genotype            | 1   | 8.474 | 8.474  | 62.52   | <0.0001           |
| EBL                 | 2   | 359.9 | 180.0  | 1327.69 | <0.0001           |
| Interaction         | 2   | 11.06 | 5.529  | 40.79   | <b>&lt;0.0001</b> |
| Residual (error)    | 142 | 19.25 | 0.1355 | -       | -                 |

**Table S7.** Changes in the expression of genes reported as involved in some aspects of BR **(A)** or GA **(B)** metabolism or inactivation in response to short (1 h) or long treatments (24 h) with simulated shade. The ratio of the expression levels of the genes shown are based on data from available microarray experiments GSE9816 (Tao *et al.*, 2008) and GSE8745 (Franklin and Whitelam, 2007). Gene description was obtained from TAIR ([www.arabidopsis.org](http://www.arabidopsis.org)) database.

| <b>A. BR metabolism or inactivation.</b> |                               |                                                                                                                                                                                                                                                                                                                                                                                                                                                                                                                                                                              |              |                      |
|------------------------------------------|-------------------------------|------------------------------------------------------------------------------------------------------------------------------------------------------------------------------------------------------------------------------------------------------------------------------------------------------------------------------------------------------------------------------------------------------------------------------------------------------------------------------------------------------------------------------------------------------------------------------|--------------|----------------------|
| Locus                                    | Other Name (Type)             | Description                                                                                                                                                                                                                                                                                                                                                                                                                                                                                                                                                                  | GSE9816      | GSE8745              |
|                                          |                               |                                                                                                                                                                                                                                                                                                                                                                                                                                                                                                                                                                              | 1 h low/high | 24 h low/high (22°C) |
| At1g50430                                | DWF5                          | Mutants are defective in BR biosynthesis ( $\Delta 7$ -sterol-C7 reduction step) and have a dwarf phenotype.                                                                                                                                                                                                                                                                                                                                                                                                                                                                 | 1,049        | 0,900                |
| At2g36800                                | DOGT1;<br>UGT73C5             | Encodes a DON-Glucosyltransferase. The UGT73C5 glucosylates both brassinolide and CS in the 23-O position. The enzyme is presumably involved in the homeostasis of those steroid hormones hence regulating BR activity. Transgenic plants overexpressing UGT73C5 show a typical BR-deficient phenotype.                                                                                                                                                                                                                                                                      | NP           | NP                   |
| At2g26710                                | BAS1;<br>CYP72B1;<br>CYP734A1 | Encodes a member of the cytochrome p450 family that serves as a control point between multiple photoreceptor systems and BR signal transduction. Involved in brassinolide metabolism. Mediates response to a variety of light signals including hypocotyl elongation and cotyledon expansion.                                                                                                                                                                                                                                                                                | 2,862        | 2,114                |
| At2g03760                                | ATST1                         | Encodes a BR sulfotransferase. In vitro experiments show that this enzyme has a preference for 24-epibrassinosteroids, particularly 24-epicathasterone, but does not act on CS and brassinolide. It is differentially expressed during development, being more abundant in young seedlings and actively growing cell cultures. Expression is induced in response to salicylic acid and methyl jasmonate and bacterial pathogens.                                                                                                                                             | 0,773        | 0,920                |
| At2g45400                                | BEN1                          | Involved in the regulation of BR metabolic pathway                                                                                                                                                                                                                                                                                                                                                                                                                                                                                                                           | 1,273        | 0,893                |
| At2g14920                                | ATST4A                        | Encodes a BR sulfotransferase that may be involved in BR inactivation. In vitro experiments show that this enzyme can act on a broad group of naturally occurring BRs, including the 24-epimers and (22R,23R)-28 homobrassinosteroids, that have an array of different side chains, though it shows a preference for (22R,23R)-28 homobrassinosteroids. ST4A is expressed in the roots and transcript levels fall in response to cytokinin treatment.                                                                                                                        | 0,876        | 0,354                |
| At2g38050                                | DET2                          | Similar to mammalian steroid-5-alpha-reductase. Involved in the brassinolide biosynthetic pathway.                                                                                                                                                                                                                                                                                                                                                                                                                                                                           | 0,814        | 1,046                |
| At3g02580                                | DWF7                          | BR biosynthetic enzyme, catalyzes $\Delta 7$ sterol C-5 desaturation step. Mutant has dwarf phenotype.                                                                                                                                                                                                                                                                                                                                                                                                                                                                       | 1,006        | 1,216                |
| At3g13730                                | CYP90D1                       | Encodes a cytochrome P-450 gene that is involved in BR biosynthesis, most likely in the conversion step of teasterone (TE) to 3-dehydroteasterone (3DT), and/or 6-deoxoteasterone (6-deoxoTE) to 6-deoxo-3-dehydroteasterone (6-deoxo3DT); or the conversion of cathasterone (CT) to TE, and/or 6-deoxocathasterone (6-deoxoCT) to 6-deoxoTE. Recently, CYP90D1 was shown to catalyse the C-23 hydroxylation of several BRs (the enzyme has a broad specificity for 22-hydroxylated substrates). Member of the CYP90C CYP450 family. Similar to Cytochrome P450 90C1 (ROT3). | 1,116        | 0,872                |
| At3g19820                                | CBB1;<br>DWF1                 | Involved in the conversion of the early BR precursor 24-methylenecholesterol to campesterol. BRs affect cellular elongation. Mutants have dwarf phenotype. DWF1 is a Ca <sup>2+</sup> -dependent                                                                                                                                                                                                                                                                                                                                                                             | 1,032        | 1,030                |

|                                                                                       |                            |                                                                                                                                                                                                                                                                                                                                                                                                                                                                                                                                                                                                                                                                                                                                                                                                                                                                                                                                                                   |       |              |
|---------------------------------------------------------------------------------------|----------------------------|-------------------------------------------------------------------------------------------------------------------------------------------------------------------------------------------------------------------------------------------------------------------------------------------------------------------------------------------------------------------------------------------------------------------------------------------------------------------------------------------------------------------------------------------------------------------------------------------------------------------------------------------------------------------------------------------------------------------------------------------------------------------------------------------------------------------------------------------------------------------------------------------------------------------------------------------------------------------|-------|--------------|
|                                                                                       |                            | calmodulin-binding protein.                                                                                                                                                                                                                                                                                                                                                                                                                                                                                                                                                                                                                                                                                                                                                                                                                                                                                                                                       |       |              |
| <b>At3g30180</b>                                                                      | <b>BR6OX2;<br/>CYP85A2</b> | Encodes a cytochrome p450 enzyme that catalyzes the last reaction in the production of brassinolide. It is capable of converting 6-deoxocastasterone into CS, a C-6 oxidation, as well as the further conversion of CS into brassinolide by a Baeyer-Villinger oxidation reaction at C-6, resulting in the formation of an unusual seven-membered lactone ring. The enzyme possesses high affinity for both C28- and C27-BRs. The expression of the gene using a CYP85A2 promoter:LUC fusion construct was shown to be under circadian and light control.                                                                                                                                                                                                                                                                                                                                                                                                         | 1,474 | 1,819        |
| <b>At3g50660</b>                                                                      | <b>DWF4;<br/>SAV1</b>      | Encodes a 22 $\alpha$ hydroxylase whose reaction is a rate-limiting step in BR biosynthetic pathway. The protein is a member of CYP90B gene family. CLM is an epi-allele with small, compressed rosette, reduced internode length, and reduced fertility, appears in selfed ddm mutant plants possibly due to loss of cytosine methylation. Transcripts accumulate in actively growing tissues, and GUS expression is negatively regulated by BRs. Localized in the endoplasmic reticulum. The in vitro expressed protein can perform the C-22 hydroxylation of a variety of C27-, C28- and C29-sterols. Cholesterol was the best substrate, followed by campesterol. Sitosterol was a poor substrate.                                                                                                                                                                                                                                                            | 1,275 | 1,935        |
| <b>At4g36380</b>                                                                      | <b>ROT3</b>                | Encodes a cytochrome P-450 gene that is involved in leaf blade expansion by controlling polar cell expansion in the leaf length direction. Member of the CYP90C CYP450 family. ROT3 was shown to be involved in brassinosteroid biosynthesis, most likely in the conversion step of typhasterol (TY) to CS. As 6-deoxo-CS was unable to restore the phenotype of rot3-1, it has been postulated that ROT3 might be specifically involved in the conversion of TY to CS in the C6-oxidation pathway of brassinolide. Recently, CYP90C1 was shown to catalyze the C-23 hydroxylation of several BRs (the enzyme has a broad specificity for 22-hydroxylated substrates).                                                                                                                                                                                                                                                                                            | 0,773 | 0,628        |
| <b>At5g05690</b>                                                                      | <b>CPD;<br/>DWF3</b>       | Encodes a member of the CP90A family, a cytochrome P450 monooxygenase which converts 6-deoxocastasterone to 6-deoxoteasterone in the late C6 oxidation pathway and castasterone to teasterone in the early C6 oxidation pathway of brassinolide biosynthesis. Expressed in cotyledons and leaves. Mutants display de-etiolation and derepression of light-induced genes in the dark, dwarfism, male sterility and activation of stress-regulated genes in the light. The expression of the gene using a CPD promoter:LUC fusion construct was shown to be under circadian and light control. Additionally, the circadian regulation was shown to be independent of BR levels as it remains unchanged in <i>br1</i> mutant lines. CPD appears to be involved in the autonomous pathway that regulates the transition to flowering, primarily through a BR11-mediated signaling pathway that affects FLC expression levels, as uncovered by double mutant analyses. | 1,243 | 1,483        |
| <b>At1g17060</b>                                                                      | <b>CYP72C1;<br/>SOB7</b>   | Encodes a protein with similarity to other cytochrome P450's and is a homolog of BAS1. Over expression causes a dwarf phenotype resembling brassinolide resistant mutants. Double mutant analysis of sob7/bas1 loss of function mutants suggests these genes have redundant functions in light responsiveness. SOB7 may function in metabolizing brassinolides. Expressed in leaf, root, stem and silique but expression highest in flower and cauline leaves. Dominant overexpressing plants have dwarf phenotype, short siliques/seeds, rounded dark green leaves and short hypocotyls in light and dark. Loss of function alleles result in plants with long hypocotyls.                                                                                                                                                                                                                                                                                       | 1,135 | 1,442        |
| <b>At5g38970</b>                                                                      | <b>BR6OX1;<br/>CYP85A1</b> | Encodes a polypeptide involved in the C-6 oxidation of BRs. Heterologous expression of the protein in yeast conferred the ability to catalyze multiple reactions in which the C-6 position of 6-deoxocastasterone, 6-deoxytyphasterol, 3-dehydro-6-deoxoteasterone and 6-deoxoteasterone are oxidized.                                                                                                                                                                                                                                                                                                                                                                                                                                                                                                                                                                                                                                                            | 0,595 | <b>0,282</b> |
| <b>At1g50430</b>                                                                      | <b>DWF5</b>                | Mutants are defective in BR biosynthesis (delta7-sterol-C7 reduction step) and have a dwarf phenotype.                                                                                                                                                                                                                                                                                                                                                                                                                                                                                                                                                                                                                                                                                                                                                                                                                                                            | 1,049 | 0,900        |
| <b>Loss-of-function mutants have a DWARF phenotype - defective in BR biosynthesis</b> |                            |                                                                                                                                                                                                                                                                                                                                                                                                                                                                                                                                                                                                                                                                                                                                                                                                                                                                                                                                                                   |       |              |
| <b>When overexpressed, plants have a DWARF phenotype - metabolism of active BRs</b>   |                            |                                                                                                                                                                                                                                                                                                                                                                                                                                                                                                                                                                                                                                                                                                                                                                                                                                                                                                                                                                   |       |              |
| <b>not clearly defined whether involved in BR metabolism or inactivation.</b>         |                            |                                                                                                                                                                                                                                                                                                                                                                                                                                                                                                                                                                                                                                                                                                                                                                                                                                                                                                                                                                   |       |              |

## B. GA metabolism or inactivation.

| Locus                                                              | Other Name (Type) | Description             | GSE9816     | GSE8745             |
|--------------------------------------------------------------------|-------------------|-------------------------|-------------|---------------------|
|                                                                    |                   |                         | 1h low/high | 24h low/high (22°C) |
| At4g25420                                                          | GA20ox1           | Encodes a GA 20 oxidase | 5,41        | 8,31                |
| At5g51810                                                          | GA20ox2           | Encodes a GA 20 oxidase | 4,11        | 3,91                |
| At5g07200                                                          | GA20ox3           | Encodes a GA 20 oxidase | 0,66        | 4,56                |
| At1g60980                                                          | GA20ox4           | Encodes a GA 20 oxidase | 1,36        | 3,06                |
| At1g44090                                                          | GA20ox5           | Encodes a GA 20 oxidase | 0,54        | 3,67                |
| At1g15550                                                          | GA3ox1            | Encodes a GA 3 oxidase  | 1,83        | 0,90                |
| At1g80340                                                          | GA3ox2            | Encodes a GA 3 oxidase  | 1,22        | 0,89                |
| At4g21690                                                          | GA3ox3            | Encodes a GA 3 oxidase  | 0,21        | 6,15                |
| At1g80330                                                          | GA3ox4            | Encodes a GA 3 oxidase  | 1,08        | 1,56                |
| At1g78440                                                          | GA2ox1            | Encodes a GA 2 oxidase  | 1,16        | 1,00                |
| At1g30040                                                          | GA2ox2            | Encodes a GA 2 oxidase  | 1,05        | 1,30                |
| At2g34555                                                          | GA2ox3            | Encodes a GA 2 oxidase  | 1,12        | 1,20                |
| At1g47990                                                          | GA2ox4            | Encodes a GA 2 oxidase  | 0,58        | 0,56                |
| At1g02400                                                          | GA2ox6            | Encodes a GA 2 oxidase  | 1,12        | 0,63                |
| At1g50960                                                          | GA2ox7            | Encodes a GA 2 oxidase  | 0,94        | 0,21                |
| At4g21200                                                          | GA2ox8            | Encodes a GA 2 oxidase  | 1,20        | 1,48                |
| Encode enzymes involved in metabolism (production) of active GAs   |                   |                         |             |                     |
| Encode enzymes involved in catabolism (inactivation) of active GAs |                   |                         |             |                     |
